# Supplementary material
Source: publisher figshare collection journal article supplement (https://acs.figshare.com/ndownloader/files/30848927)
Supplement: Supplementary file 1 [file 30848927]

## *Supporting Information*

### ***Exo*-Selective and Enantioselective Photoenolization/Diels–Alder Reaction**

Min Hou,<sup>a†</sup> Mengmeng Xu,<sup>a†</sup> Baochao Yang,<sup>a</sup> Haibing He,<sup>\*b</sup> Shuanhu Gao<sup>\*a,b</sup>

<sup>a</sup> Shanghai Key Laboratory of Green Chemistry and Chemical Processes, School of Chemistry and Molecular Engineering, East China Normal University, 3663N Zhongshan Road, Shanghai 200062, China.

<sup>b</sup> Shanghai Engineering Research Center of Molecular Therapeutics and New Drug Development, East China Normal University, 3663N Zhongshan Road, Shanghai 200062, China.

Corresponding Author: Haibing He<sup>\*</sup> and Shuanhu Gao<sup>\*</sup>

E-mail: hbbe@chem.ecnu.edu.cn, shgao@chem.ecnu.edu.cn

## Contents

|             |                                                                  |            |
|-------------|------------------------------------------------------------------|------------|
| <b>I.</b>   | <b>General Information</b>                                       | <b>S3</b>  |
| <b>II.</b>  | <b>General Procedures for the enantioselective PEDA reaction</b> | <b>S4</b>  |
| <b>III.</b> | <b>Crystal data and structure refinement for 7</b>               | <b>S14</b> |
| <b>IV.</b>  | <b>Crystal data and structure refinement for 7a</b>              | <b>S16</b> |
| <b>V.</b>   | <b>Crystal data and structure refinement for 9</b>               | <b>S18</b> |
| <b>VI.</b>  | <b>NMR and HPLC Spectra</b>                                      | <b>S20</b> |

## I. General Information

General Experimental Procedures. All reactions were carried out under nitrogen except noted. Anhydrous dichloromethane, toluene, acetonitrile and dimethylformamide were purified by the PS-MD5 (Innovative Technology) solvent purification system. Tetrahydrofuran and anhydrous diethyl ether were distilled from sodium-benzophenone ketyl. All other commercial reagents were used as received. Flash column chromatography was performed as described by Still, employing Qingdao Haiyang silica gel 60 (200–300 mesh). TLC analyses were performed on EMD 250  $\mu\text{m}$  Silica Gel HSGF254 plates and visualized by quenching of UV fluorescence ( $\lambda_{\text{max}} = 254 \text{ nm}$ ), or by staining ceric ammonium molybdate, phosphomolybdic acid, or potassium permanganate.  $^1\text{H}$  and  $^{13}\text{C}$  NMR spectra were recorded on a Bruker 500, 400 spectrometer. Chemical shifts for  $^1\text{H}$  and  $^{13}\text{C}$  NMR spectra are reported in ppm ( $\delta$ ) relative to residue protium in the solvent ( $\text{CDCl}_3$ :  $\delta$  7.26, 77.0 ppm, and the multiplicities are presented as follows: s = singlet, d = doublet, t = triplet, q = quartet, m = multiplet, brs = broad single. High-resolution mass spectra (HRMS) were acquired on Thermo Scientific, Q Exactive Focus (Orbitrap). The  $[\alpha]_D^{25}$  was recorded using Anton Paar MCP 5500. Infrared (IR) spectra were obtained using a Shimadzu IRTracer-100 fourier transform infrared spectroscopy (FTIR). HPLC analysis on chiral stationary phase was performed on an Agilent 1200-series instrument, employing Daicel Chiralpak OD-H, AS-H, OJ-H and IG chiral columns. Single-crystal X-ray diffraction data were collected on a X-ray Diffractometer (XtaLAB P2000). The photo reactor used for this photolysis is Rayonet RPR-200 (Southern New England Ultraviolet Company). The irradiation vessel of the photo reaction is quartz glass tube, 10 cm from the light source.

## II. General Procedures for Asymmetric Photoenolization/Diels–Alder Reaction (APEDA)

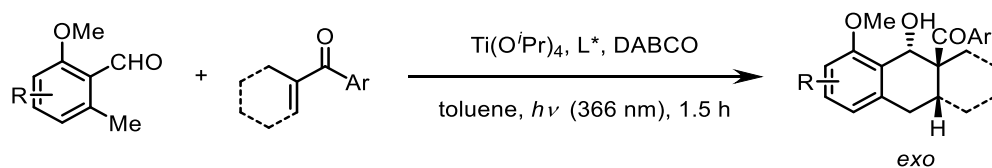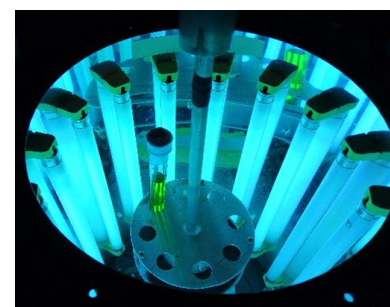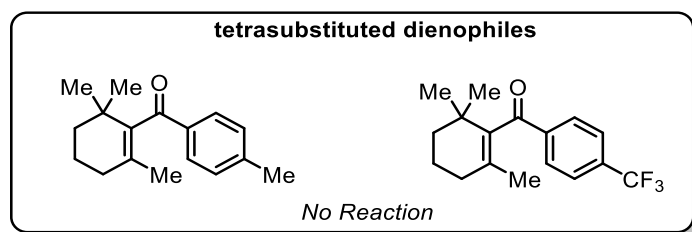

To a solution of aromatic aldehyde (0.3 mmol, 1.0 equiv.), chiral ligand (0.15 mmol, 0.5 equiv.) and 1,4-diazabicyclo[2.2.2]octane (DABCO) (0.3 mmol, 1.0 equiv.) in anhydrous toluene (30 mL, 0.01 M) was added dienophile (0.45 mmol, 1.5 equiv.) (if the dienophile was solid, it was added before the addition of solvent) under  $\text{N}_2$ , in quartz tube sealed with rubber plug. Then, titanium (IV) isopropoxide ( $\text{Ti}(\text{O}i\text{-Pr})_4$ , 0.3 mmol, 1.0 equiv.) was added, after homogeneous mixing, the solution was photolyzed at room temperature in a Rayonet chamber reactor (16 lamps) at  $\lambda_{\text{max}} = 366$  nm for 1.5 h. Then the reaction mixture was poured into saturated sodium bicarbonate and stirred over 30 min, the above mixture was extracted three times with ethyl acetate, the combined organic phases were washed twice with brine and dried over anhydrous sodium sulfate. The dried solution was filtered and the filtrate was concentrated under vacuum. The residue was purified by silica gel column chromatography to give the corresponding cycloadducts, and the ligand could be recovered over 95% yield.

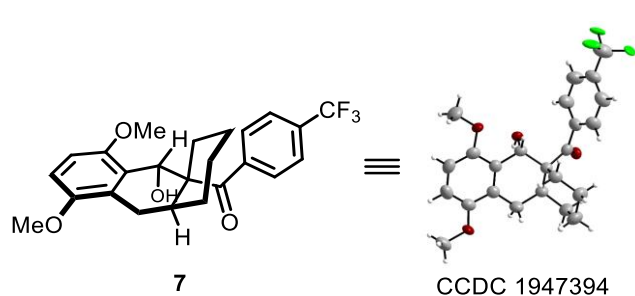

**7** (50 mg, dr > 20:1) was prepared according to general procedure in 38% yield (in the presence of  $\text{Ti}(\text{O}i\text{-Pr})_4$ , (0.9 mmol, 3.0 equiv.), without ligand and DABCO). The reaction time was 90 min under 366 nm light. The product was isolated through silica gel column chromatography (6% to 20% ethyl acetate-petroleum ether) as a white solid;  $R_f = 0.3$  (20% ethyl acetate-petroleum ether); and it was recrystallized from dichloromethane /hexane (V/V = 1/4), slowly volatilize for several days at 25 °C, to obtain colorless crystals, CCDC (1947394).  $^1\text{H}$  NMR (400 MHz,  $\text{CDCl}_3$ )  $\delta$  7.92 (d,  $J = 8.0$  Hz, 2H), 7.67 (d,  $J = 8.1$  Hz, 2H), 6.75 (d,  $J = 8.8$  Hz, 1H), 6.71 (d,  $J = 8.9$  Hz, 1H), 5.10 (d,  $J = 3.3$  Hz, 1H), 3.84 (s, 3H), 3.82 (s, 3H), 2.95 – 2.80 (m, 2H), 2.72 – 2.61 (m, 2H), 1.95 (d,  $J = 12.0$  Hz, 1H), 1.62 – 1.42 (m, 5H), 1.31 – 1.21 (m, 2H). ppm;  $^{13}\text{C}$  NMR (100 MHz,  $\text{CDCl}_3$ )  $\delta$  208.6, 151.5, 151.1, 144.7, 132.0 (q,  $J = 32.6$  Hz, 1C), 127.8 (2C), 125.7, 125.6, 125.2, 124.9 (q,  $J = 3.8$  Hz, 1C), 122.5, 108.9, 107.2, 69.1, 55.64, 55.60, 55.1, 27.4, 27.2, 26.5, 24.7, 22.8, 19.6 ppm; IR  $\nu_{\text{max}}$  2949, 1481,

1325, 1305, 1255, 1166, 1126, 1066, 742  $\text{cm}^{-1}$ ; HRMS–ESI ( $m/z$ ):  $[\text{M}+\text{Na}]^+$  calcd for  $\text{C}_{24}\text{H}_{25}\text{O}_4\text{F}_3\text{Na}$ , 457.1597; found, 457.1594.

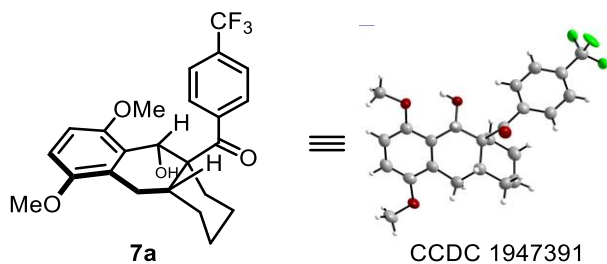

**7a** (102 mg, dr = 3.6:1) was prepared according to general procedure in 78% yield. The reaction time was 90 min under 366 nm light. The product was isolated through silica gel column chromatography (6% to 20% ethyl acetate-petroleum ether) as a white solid:  $R_f$  = 0.6 (20% ethyl acetate-petroleum ether); m.p. 142 – 144  $^{\circ}\text{C}$ ;  $[\alpha]_{\text{D}}^{20}$  -70.2 (c

1.24, DCM); and it was recrystallized from dichloromethane /hexane (V/V = 1/4), slowly volatilize for several days at 25  $^{\circ}\text{C}$ , to obtain colorless crystals, CCDC (1947391).  $^1\text{H}$  NMR (400 MHz,  $\text{CDCl}_3$ )  $\delta$  8.06 (d,  $J$  = 8.1 Hz, 2H), 7.66 (d,  $J$  = 8.1 Hz, 2H), 6.72 (s, 2H), 5.23 (s, 1H), 4.81 (d,  $J$  = 1.5 Hz, 1H), 3.84 (s, 3H), 3.81 (s, 3H), 2.88 – 2.64 (m, 3H), 2.44 (dt,  $J$  = 14.6, 2.9 Hz, 1H), 1.75 – 1.65 (m, 1H), 1.60 – 1.39 (m, 5H), 1.05 – 0.90 (m, 1H) ppm;  $^{13}\text{C}$  NMR (100 MHz,  $\text{CDCl}_3$ )  $\delta$  211.9, 151.8, 151.3, 144.7, 131.9 (q,  $J$  = 32.5 Hz, 1C), 127.9 (2C), 126.7, 125.9, 125.2, 124.9 (q,  $J$  = 3.8 Hz, 1C), 122.5, 108.2, 108.1, 73.5, 55.8, 55.7, 55.6, 33.4, 27.6, 24.3, 21.8, 21.6, 19.1 ppm; IR  $\nu_{\text{max}}$  2949, 1481, 1325, 1305, 1255, 1166, 1126, 1066, 742  $\text{cm}^{-1}$ ; HRMS–ESI ( $m/z$ ):  $[\text{M}+\text{Na}]^+$  calcd for  $\text{C}_{24}\text{H}_{25}\text{O}_4\text{F}_3\text{Na}$ , 457.1597; found, 457.1594; Enantiomeric excess: 99.1%, determined by HPLC (Daicel Chiralpak IG, hexane/isopropanol = 70/30, flow rate 0.8 mL/min, T = 25  $^{\circ}\text{C}$ , 230 nm):  $t_{\text{R}}$  = 10.883 min (major),  $t_{\text{R}}$  = 17.052 min (minor).

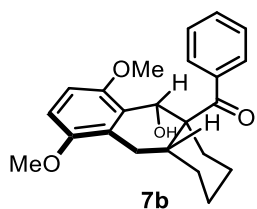

**7b** (42 mg, dr = 5.3:1) was prepared according to general procedure in 38% yield. The reaction time was 90 min under 366 nm light. The product was isolated through silica gel column chromatography (6% to 20% ethyl acetate-petroleum ether) as a yellow oil:  $R_f$  = 0.5 (20% ethyl acetate-petroleum ether);  $[\alpha]_{\text{D}}^{20}$  -77.4 (c 0.25, DCM);  $^1\text{H}$  NMR (400 MHz,  $\text{CDCl}_3$ )  $\delta$  7.96 – 7.91 (m, 2H), 7.48 – 7.36 (m, 3H), 6.71 (s, 2H), 5.30 (d,  $J$  = 1.6

Hz, 1H), 4.69 (d,  $J$  = 1.7 Hz, 1H), 3.83 (s, 3H), 3.81 (s, 3H), 2.88 – 2.74 (m, 2H), 2.74 – 2.61 (m, 1H), 2.52 (dt,  $J$  = 14.7, 3.8 Hz, 1H), 1.72 – 1.51 (m, 4H), 1.49 – 1.42 (m, 1H), 1.42 – 1.34 (m, 1H), 1.08 (dt,  $J$  = 13.4, 4.6 Hz, 1H) ppm;  $^{13}\text{C}$  NMR (100 MHz,  $\text{CDCl}_3$ )  $\delta$  211.9, 151.9, 151.2, 141.3, 130.3, 127.8, 127.6 (2C), 127.0 (2C), 126.0, 108.1, 107.9, 73.0, 55.8 (d,  $J$  = 2.4 Hz, 1C), 55.6 (d,  $J$  = 2.4 Hz, 1C), 55.3, 33.6, 27.6, 24.3, 21.8, 21.7, 19.3 ppm; IR  $\nu_{\text{max}}$  1371, 1282, 1267, 1180, 1141, 744, 707  $\text{cm}^{-1}$ ; HRMS–ESI ( $m/z$ ):  $[\text{M}+\text{Na}]^+$  calcd for  $\text{C}_{23}\text{H}_{26}\text{O}_4\text{Na}$ , 389.1723; found, 389.1719; Enantiomeric excess: 99.3%, determined by HPLC (Daicel Chiralpak OD-H, hexane/isopropanol = 85/15, flow rate 0.8 mL/min, T = 25  $^{\circ}\text{C}$ , 230 nm):  $t_{\text{R}}$  = 8.594 min (minor),  $t_{\text{R}}$  = 16.710 min (major).

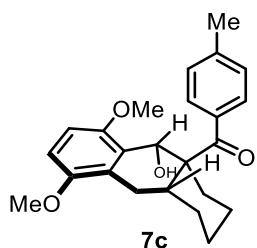

**7c** (65 mg, dr = 7.3:1) was prepared according to general procedure in 58% yield. The reaction time was 90 min under 366 nm light. The product was isolated through silica gel column chromatography (6% to 20% ethyl acetate-petroleum ether) as a yellow solid:  $R_f$  = 0.55 (20% ethyl acetate-petroleum ether); m.p. 130 – 132 °C;  $[\alpha]_D^{20}$  -103 (c 0.26, DCM);  $^1\text{H}$  NMR (400 MHz,  $\text{CDCl}_3$ )  $\delta$  7.87 (d,  $J$  = 8.2 Hz, 2H), 7.19 (d,  $J$  = 8.0 Hz, 2H), 6.71 (s, 2H), 5.30 (d,  $J$  = 1.7 Hz, 1H), 4.66 (d,  $J$  = 1.8 Hz, 1H), 3.82 (s, 3H), 3.81 (s, 3H), 2.88 – 2.76 (m, 2H), 2.69 (q,  $J$  = 12.0 Hz, 1H), 2.54 (dt,  $J$  = 14.9, 3.7 Hz, 1H), 2.39 (s, 3H), 1.71 – 1.60 (m, 1H), 1.56 – 1.31 (m, 5H), 1.10 (dt,  $J$  = 13.3, 4.5 Hz, 1H) ppm;  $^{13}\text{C}$  NMR (100 MHz,  $\text{CDCl}_3$ )  $\delta$  211.1, 151.9, 151.1, 140.7, 138.4, 128.4 (2C), 127.9 (2C), 127.0, 126.1, 108.0, 107.8, 72.7, 55.7 (d,  $J$  = 2.2 Hz, 1C), 55.5 (d,  $J$  = 2.1 Hz, 1C), 55.2, 33.6, 27.5, 24.3, 21.82, 21.78, 21.4, 19.3 ppm; IR  $\nu_{\text{max}}$  3003, 1604, 1342, 1203, 1147, 1066, 1016, 827, 742, 702  $\text{cm}^{-1}$ ; HRMS–ESI ( $m/z$ ):  $[\text{M}+\text{Na}]^+$  calcd for  $\text{C}_{24}\text{H}_{28}\text{O}_4\text{Na}$ , 403.1880; found, 403.1876; Enantiomeric excess: 96%, determined by HPLC (Daicel Chiralpak OD-H, hexane/isopropanol = 70/30, flow rate 0.8 mL/min,  $T$  = 25 °C, 230 nm):  $t_R$  = 9.673 min (minor),  $t_R$  = 15.138 min (major).

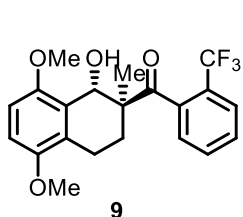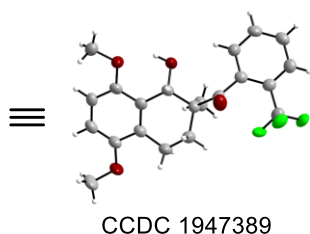

**9** (73.2 mg) was prepared according to general procedure in 62% yield. DABCO (0.60 mmol, 2.0 equiv.) was used. The reaction time was 90 min under 366 nm light. The product was isolated through silica gel column chromatography (6% to 20% ethyl acetate-petroleum ether) as a white solid:  $R_f$  = 0.33 (20% ethyl acetate-petroleum ether); m.p. 118 - 120;  $[\alpha]_D^{20}$  -20.6 (c 0.73, DCM); and it was recrystallized from dichloromethane /hexane (V/V = 1/4), slowly volatilize for several days at 25 °C, to obtain colorless crystals, CCDC (1947389).  $^1\text{H}$  NMR (500 MHz,  $\text{CDCl}_3$ )  $\delta$  7.81 – 7.77 (m, 1H), 7.69 – 7.66 (m, 1H), 7.58 – 7.53 (m, 1H), 7.51 – 7.46 (m, 1H), 6.73 (d,  $J$  = 8.9 Hz, 1H), 6.69 (d,  $J$  = 8.9 Hz, 1H), 5.37 (s, 1H), 4.43 (s, 1H), 3.84 (s, 3H), 3.78 (s, 3H), 2.81 – 2.70 (m, 1H), 2.68 – 2.57 (m, 1H), 2.22 – 2.12 (m, 1H), 2.04 – 1.94 (m, 1H), 1.22 (s, 3H) ppm;  $^{13}\text{C}$  NMR (125 MHz,  $\text{CDCl}_3$ )  $\delta$  212.0, 152.1, 151.3, 139.6 (q,  $J$  = 1.9 Hz, 1C), 131.0, 128.7, 127.7, 126.7, 126.6 (q,  $J$  = 31.7 Hz, 1C), 126.4 (q,  $J$  = 4.5 Hz, 1C), 126.2, 123.6 (q,  $J$  = 273.7 Hz, 1C), 108.3, 108.2, 71.5, 55.8, 55.5, 51.5, 29.7, 20.5, 16.1 ppm; IR  $\nu_{\text{max}}$  3055, 1697, 1280, 1107, 802, 744  $\text{cm}^{-1}$ ; HRMS–EI ( $m/z$ ):  $[\text{M}]^+$  calcd for  $\text{C}_{21}\text{H}_{21}\text{F}_3\text{O}_4$ , 394.1392; found, 394.1395; Enantiomeric excess: 97%, determined by HPLC (Daicel Chiralpak IG, hexane/isopropanol = 85/15, flow rate 0.8 mL/min,  $T$  = 25 °C, 230 nm):  $t_R$  = 13.027 min (major),  $t_R$  = 15.067 min (minor).

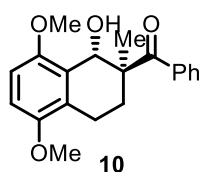

**10** (86.9 mg) was prepared according to general procedure in 92% yield. DABCO (0.60 mmol, 2.0 equiv.) was used. The reaction time was 90 min under 366 nm light. The product was isolated through silica gel column chromatography (6% to 20% ethyl acetate-petroleum ether) as a yellow solid:  $R_f$  = 0.34 (20% ethyl acetate-petroleum ether); m.p. 96 - 98;  $[\alpha]_D^{20}$  +56.2 (c 0.24, DCM);  $^1\text{H}$  NMR (400 MHz,  $\text{CDCl}_3$ )  $\delta$  7.65 – 7.59 (m, 2H), 7.46 – 7.41 (m, 1H), 7.38 – 7.31 (m, 2H), 6.66 (s, 2H), 5.43 (s, 1H), 3.79 (s, 3H), 3.73 (s, 3H), 2.81 – 2.66 (m, 2H), 2.50 – 2.29 (m, 2H), 2.14

– 2.03 (m, 1H), 1.58 (s, 3H) ppm;  $^{13}\text{C}$  NMR (125 MHz,  $\text{CDCl}_3$ )  $\delta$  207.3, 151.6, 151.2, 138.8, 130.8, 128.2, 128.0 (2C), 127.5 (2C), 125.9, 108.6, 107.9, 66.8, 55.8, 55.5, 51.2, 27.5, 21.1, 20.8 ppm; IR  $\nu_{\text{max}}$  3691, 3055, 1697, 1265, 1107, 744  $\text{cm}^{-1}$ ; HRMS–EI ( $m/z$ ):  $[\text{M}]^+$  calcd for  $\text{C}_{20}\text{H}_{22}\text{O}_4$ , 326.1518; found, 326.1512; Enantiomeric excess: 79%, determined by HPLC (Daicel Chiralpak IG, hexane/isopropanol = 70/30, flow rate 0.8 mL/min,  $T = 25\text{ }^\circ\text{C}$ , 230 nm):  $t_{\text{R}} = 13.843$  min (major),  $t_{\text{R}} = 16.134$  min (minor).

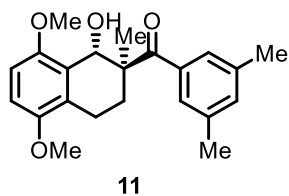

**11** (101.1 mg, dr = 5:1) was prepared according to general procedure in 81% yield. DABCO (0.60 mmol, 2.0 equiv.) was used. The reaction time was 90 min under 366 nm light. The product was isolated through silica gel column chromatography (6% to 20% ethyl acetate-petroleum ether) as a colorless oil:  $R_f = 0.27$  (20% ethyl acetate-petroleum ether);  $[\alpha]_{\text{D}}^{20} +91.1$  (c 0.77, DCM);  $^1\text{H}$  NMR (400 MHz,  $\text{CDCl}_3$ )  $\delta$  7.14 (s, 2H), 7.05 (s, 1H), 6.67 (s, 2H), 5.41 (s, 1H), 3.79 (s, 3H), 3.74 (s, 3H), 2.77 – 2.65 (m, 2H), 2.53 – 2.40 (m, 1H), 2.29 (s, 6H), 2.13 – 2.01 (m, 1H), 1.54 (s, 3H) ppm;  $^{13}\text{C}$  NMR (100 MHz,  $\text{CDCl}_3$ )  $\delta$  208.0, 151.6, 151.3, 139.1, 137.5 (2C), 132.2, 128.3, 126.1, 125.0 (2C), 108.6, 107.8, 66.8, 55.8, 55.5, 51.3, 27.4, 21.3 (2C), 21.1, 21.0 ppm; IR  $\nu_{\text{max}}$  2889, 1685, 1267, 1049, 744  $\text{cm}^{-1}$ ; HRMS–ESI ( $m/z$ ):  $[\text{M}+\text{Na}]^+$  calcd for  $\text{C}_{22}\text{H}_{26}\text{O}_4\text{Na}$ , 377.1723; found, 377.1719; Enantiomeric excess: 82%, determined by HPLC (Daicel Chiralpak IG, hexane/isopropanol = 85/15, flow rate 0.8 mL/min,  $T = 25\text{ }^\circ\text{C}$ , 230 nm):  $t_{\text{R}} = 26.115$  min (major),  $t_{\text{R}} = 31.599$  min (minor).

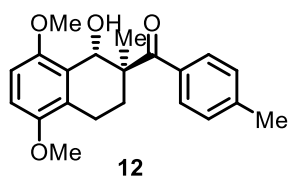

**12** (72.7 mg) was prepared according to general procedure in 71% yield. DABCO (0.60 mmol, 2.0 equiv.) was used. The reaction time was 90 min under 366 nm light. The product was isolated through silica gel column chromatography (6% to 20% ethyl acetate-petroleum ether) as a colorless oil:  $R_f = 0.18$  (20% ethyl acetate-petroleum ether);  $[\alpha]_{\text{D}}^{20} +122$  (c 0.49, DCM);  $^1\text{H}$  NMR (400 MHz,  $\text{CDCl}_3$ )  $\delta$  7.62 (d,  $J = 8.1$  Hz, 2H), 7.16 (d,  $J = 8.1$  Hz, 2H), 6.68 (d,  $J = 8.9$  Hz, 1H), 6.65 (d,  $J = 8.9$  Hz, 1H), 5.46 (s, 1H), 3.81 (s, 3H), 3.72 (s, 3H), 2.78 – 2.66 (m, 2H), 2.44 – 2.31 (m, 5H), 2.18 – 2.07 (m, 1H), 1.59 (s, 3H) ppm;  $^{13}\text{C}$  NMR (100 MHz,  $\text{CDCl}_3$ )  $\delta$  206.2, 151.7, 151.2, 141.5, 135.7, 128.7, 128.5 (2C), 128.0 (2C), 125.9, 108.6, 107.9, 66.78, 66.75, 55.9, 55.5, 51.0, 27.7, 21.2, 21.1 ppm; IR  $\nu_{\text{max}}$  3055, 2889, 1676, 1315, 1267, 1051, 744  $\text{cm}^{-1}$ ; HRMS–EI ( $m/z$ ):  $[\text{M}]^+$  calcd for  $\text{C}_{21}\text{H}_{24}\text{O}_4$ , 340.1675; found, 340.1680; Enantiomeric excess: 85%, determined by HPLC (Daicel Chiralpak IG, hexane/isopropanol = 85/15, flow rate 0.8 mL/min,  $T = 25\text{ }^\circ\text{C}$ , 230 nm):  $t_{\text{R}} = 33.565$  min (major),  $t_{\text{R}} = 38.586$  min (minor).

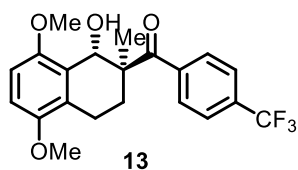

**13** (80.5 mg, dr = 3.5:1) was prepared according to general procedure in 68% yield. DABCO (0.60 mmol, 2.0 equiv.) was used. The reaction time was 90 min under 366 nm light. The product was isolated through silica gel column chromatography (6% to 20% ethyl acetate-petroleum ether) as a colorless oil:  $R_f = 0.15$  (20% ethyl acetate-petroleum ether);  $[\alpha]_{\text{D}}^{20} +81.9$  (c 0.19, DCM);  $^1\text{H}$  NMR (500 MHz,  $\text{CDCl}_3$ )  $\delta$  7.60 (s, 4H), 6.68 (d,  $J = 8.8$  Hz, 1H), 6.65 (d,  $J = 8.8$  Hz, 1H), 5.35 (s, 1H), 3.76 (s, 3H), 3.74 (s, 3H), 2.94 (s, 1H), 2.80 – 2.68 (m, 1H), 2.57 – 2.46 (m, 1H), 2.34 – 2.23 (m, 1H), 2.10 – 2.04 (m, 1H), 1.53 (s, 3H) ppm;  $^{13}\text{C}$  NMR (125 MHz,  $\text{CDCl}_3$ )  $\delta$

207.5, 151.6, 151.3, 142.5, 132.1 (q,  $J = 32.6$  Hz, 1C), 127.7, 127.4 (2C), 125.9, 125.0 (q,  $J = 3.7$  Hz, 2C), 123.7 (d,  $J = 272.3$  Hz, 1C), 108.7, 107.9, 66.9, 55.7, 55.5, 51.5, 27.4, 20.9, 20.3 ppm; IR  $\nu_{\max}$  3055, 1697, 1280, 1265, 1107, 744  $\text{cm}^{-1}$ ; HRMS–EI ( $m/z$ ):  $[M]^+$  calcd for  $\text{C}_{21}\text{H}_{21}\text{F}_3\text{O}_4$ , 394.1392; found, 394.1387; Enantiomeric excess: 99.5%, determined by HPLC (Daicel Chiralpak IG, hexane/isopropanol = 70/30, flow rate 0.8 mL/min,  $T = 25$  °C, 230 nm):  $t_R = 8.402$  min (major),  $t_R = 9.827$  min (minor). For the 1 mmol scale reaction, two 50 ml quartz glass tubes are used (0.5 mmol for each), after the reaction is complete, combine the two reaction solutions for treatment, the same yield and ee value was obtained.

For the 1 mmol scale reaction, two 50 ml quartz glass tubes are used (0.5 mmol for each): aromatic aldehyde (0.5 mmol, 1.0 equiv.), chiral ligand (0.25 mmol, 0.5 equiv.), dienophile (0.75 mmol, 1.5 equiv.) and 1,4-diazabicyclo[2.2.2]octane (DABCO) (1.0 mmol, 2.0 equiv.) was added in a 50 ml quartz glass tube sealed with rubber plug, then add anhydrous toluene (50 mL, 0.01 M) to dissolve the reactants under  $\text{N}_2$ . Then, titanium (IV) isopropoxide ( $\text{Ti}(\text{O}i\text{-Pr})_4$ , 0.5 mmol, 1.0 equiv.) was added, after homogeneous mixing, the solution was photolyzed at room temperature in a Rayonet chamber reactor (16 lamps) at  $\lambda_{\max} = 366$  nm for 1.5 h. After the reaction is complete, combine the two reaction solutions for treatment. The reaction mixture was poured into saturated sodium bicarbonate and stirred over 30 min, the above mixture was extracted three times with ethyl acetate, the combined organic phases were washed twice with brine and dried over anhydrous sodium sulfate. The dried solution was filtered and the filtrate was concentrated under vacuum. The residue was purified by silica gel column chromatography to give the corresponding cycloadducts 268 mg (68%, dr = 3.5:1, 99.5% ee).

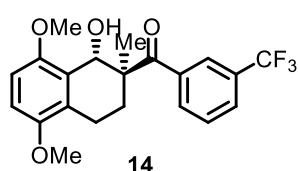

**14**

**14** (109.1 mg) was prepared according to general procedure in 85% yield. Ligand **L10** (0.24 mmol, 0.8 equiv.), DABCO (0.96 mmol, 3.2 equiv.) was used. The reaction time was 90 min under 366 nm light. The product was isolated through silica gel column chromatography (6% to 20% ethyl acetate-petroleum ether) as a

colorless oil:  $R_f = 0.32$  (20% ethyl acetate-petroleum ether);  $[\alpha]_D^{20} +60.6$  (c 0.86, DCM);  $^1\text{H}$  NMR (400 MHz,  $\text{CDCl}_3$ )  $\delta$  7.80 – 7.65 (m, 3H), 7.54 – 7.45 (m, 1H), 6.68 (d,  $J = 8.9$  Hz, 1H), 6.66 (d,  $J = 8.9$  Hz, 1H), 5.36 (s, 1H), 3.77 (s, 3H), 3.74 (s, 3H), 2.84 (s, 1H), 2.79 – 2.69 (m, 1H), 2.56 – 2.45 (m, 1H), 2.35 – 2.26 (m, 1H), 2.16 – 2.03 (m, 1H), 1.55 (s, 3H) ppm;  $^{13}\text{C}$  NMR (125 MHz,  $\text{CDCl}_3$ )  $\delta$  206.7, 151.5, 151.3, 139.6, 130.5 (2C), 128.6 (2C), 127.7, 127.2, 125.9, 124.1, 108.8, 107.8, 66.8, 55.7, 55.51, 51.46, 27.3, 21.0, 20.6 ppm; IR  $\nu_{\max}$  2889, 1685, 1267, 1089, 1051, 881  $\text{cm}^{-1}$ ; HRMS–EI ( $m/z$ ):  $[M]^+$  calcd for  $\text{C}_{21}\text{H}_{21}\text{F}_3\text{O}_4$ , 394.1392; found, 394.1388; Enantiomeric excess: 98%, determined by HPLC (Daicel Chiralpak IG, hexane/isopropanol = 85/15, flow rate 0.8 mL/min,  $T = 25$  °C, 230 nm):  $t_R = 8.494$  min (major),  $t_R = 10.672$  min (minor).

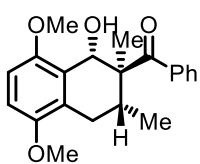

**15**

**15** (63.8 mg) was prepared according to general procedure in 62% yield. DABCO (0.60 mmol, 2.0 equiv.) was used. The reaction time was 90 min under 366 nm light. The product was isolated through silica gel column chromatography (6% to 20% ethyl acetate-petroleum ether) as a white solid:  $R_f = 0.46$  (20% ethyl acetate-petroleum ether); m.p. 88 - 90 °C;  $[\alpha]$



<sup>20</sup><sub>D</sub> -23.4 (c 0.37, DCM); <sup>1</sup>H NMR (500 MHz, CDCl<sub>3</sub>) δ 7.66 – 7.61 (m, 2H), 7.46 – 7.36 (m, 3H), 6.72 (d, *J* = 8.9 Hz, 1H), 6.68 (d, *J* = 8.9 Hz, 1H), 5.43 (s, 1H), 4.73 (d, *J* = 1.3 Hz, 1H), 3.81 (s, 3H), 3.79 (s, 3H), 2.79 (dd, *J* = 17.9, 5.0 Hz, 1H), 2.55 – 2.44 (m, 1H), 2.38 – 2.26 (m, 1H), 1.19 (s, 3H), 1.06 (d, *J* = 6.7 Hz, 3H) ppm; <sup>13</sup>C NMR (125 MHz, CDCl<sub>3</sub>) δ 212.5, 152.2, 151.1, 141.4, 129.8, 127.9 (2C), 127.4, 126.5 (2C), 126.1, 108.3, 108.1, 74.1, 55.8, 55.7, 55.5, 33.4, 29.5, 16.6, 9.9 ppm; IR ν<sub>max</sub> 3055, 2306, 1676, 1317, 1265, 740 cm<sup>-1</sup>; HRMS–ESI (*m/z*): [M+Na]<sup>+</sup> calcd for C<sub>21</sub>H<sub>24</sub>O<sub>4</sub>Na, 363.1567; found, 363.1562; Enantiomeric excess: 96%, determined by HPLC (Daicel Chiralpak OD-H, hexane/isopropanol = 85/15, flow rate 0.8 mL/min, T = 25 °C, 230 nm): t<sub>R</sub> = 9.985 min (minor), t<sub>R</sub> = 13.200 min (major).

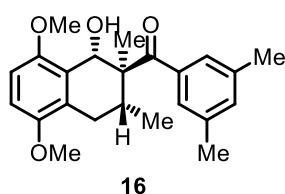

**16** (47.5 mg) was prepared according to general procedure in 43% yield. DABCO (0.60 mmol, 2.0 equiv.) was used. The reaction time was 90 min under 366 nm light. The product was isolated through silica gel column chromatography (6% to 20% ethyl acetate-petroleum ether) as a white solid: R<sub>f</sub> = 0.5 (20% ethyl acetate-petroleum ether);

m.p. 142 – 144 °C; [α]<sub>D</sub><sup>20</sup> -25.2 (c 0.58, DCM); <sup>1</sup>H NMR (500 MHz, CDCl<sub>3</sub>) δ 7.22 (s, 2H), 7.06 (s, 1H), 6.72 (d, *J* = 8.9 Hz, 1H), 6.69 (d, *J* = 8.9 Hz, 1H), 5.44 (s, 1H), 4.69 (d, *J* = 1.3 Hz, 1H), 3.82 (s, 3H), 3.79 (s, 3H), 2.78 (dd, *J* = 18.0, 5.1 Hz, 1H), 2.55 – 2.46 (m, 1H), 2.36 – 2.29 (m, 7H), 1.18 (s, 3H), 1.06 (d, *J* = 6.7 Hz, 3H) ppm; <sup>13</sup>C NMR (125 MHz, CDCl<sub>3</sub>) δ 212.8, 152.3, 151.1, 141.5, 137.4 (2C), 131.5, 127.6, 126.2, 124.2 (2C), 108.3, 108.0, 74.1, 55.8, 55.7, 55.5, 33.5, 29.5, 21.4 (2C), 16.6, 10.0 ppm; IR ν<sub>max</sub> 3055, 1685, 1483, 1267, 1111, 746 cm<sup>-1</sup>; HRMS–ESI (*m/z*): [M+Na]<sup>+</sup> calcd for C<sub>23</sub>H<sub>28</sub>O<sub>4</sub>Na, 391.1880; found, 391.1874; Enantiomeric excess: 99%, determined by HPLC (Daicel Chiralpak OD-H, hexane/isopropanol = 85/15, flow rate 0.8 mL/min, T = 25 °C, 230 nm): t<sub>R</sub> = 9.099 min (major), t<sub>R</sub> = 11.419 min (minor).

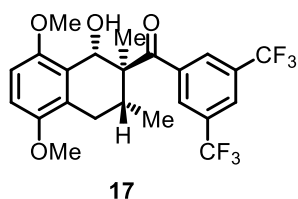

**17** (97.7 mg) was prepared according to general procedure in 68% yield. DABCO (0.60 mmol, 2.0 equiv.) was used. The reaction time was 90 min under 366 nm light. The product was isolated through silica gel column chromatography (6% to 20% ethyl acetate-petroleum ether) as a colorless oil: R<sub>f</sub> = 0.5 (20% ethyl acetate-petroleum ether);

[α]<sub>D</sub><sup>20</sup> +45.3 (c 0.52, DCM); <sup>1</sup>H NMR (400 MHz, CDCl<sub>3</sub>) δ 8.30 (s, 2H), 7.95 (s, 1H), 6.76 (d, *J* = 8.8 Hz, 1H), 6.72 (d, *J* = 8.8 Hz, 1H), 5.06 (d, *J* = 3.0 Hz, 1H), 3.84 (s, 3H), 3.81 (s, 3H), 3.00 (dd, *J* = 18.5, 5.8 Hz, 1H), 2.88 – 2.79 (m, 1H), 2.75 (d, *J* = 3.0 Hz, 1H), 2.18 (dd, *J* = 18.5, 11.6 Hz, 1H), 1.10 (s, 3H), 0.89 (d, *J* = 6.5 Hz, 3H) ppm; <sup>13</sup>C NMR (100 MHz, CDCl<sub>3</sub>) δ 206.7, 151.7, 150.8 (2C), 143.0 (2C), 131.3 (q, *J* = 33.6 Hz, 2C), 128.0, 125.9, 125.5, 123.5, 123.1 (q, *J* = 272.8 Hz, 1C), 109.1, 107.5, 70.4, 70.3, 55.6, 54.5, 29.5, 26.9, 16.8, 14.1 ppm; IR ν<sub>max</sub> 3055, 1751, 1707, 1483, 1267, 1109, 746 cm<sup>-1</sup>; HRMS–ESI (*m/z*): [M+Na]<sup>+</sup> calcd for C<sub>23</sub>H<sub>22</sub>F<sub>6</sub>O<sub>4</sub>Na, 499.1314; found, 499.1308; Enantiomeric excess: 91%, determined by HPLC (Daicel Chiralpak IG, hexane/isopropanol = 95/5, flow rate 0.8 mL/min, T = 25 °C, 230 nm): t<sub>R</sub> = 9.018 min (major), t<sub>R</sub> = 11.141 min (minor).

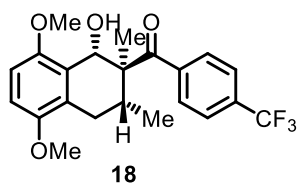

**18** (74.3 mg) was prepared according to general procedure in 61% yield. DABCO (0.60 mmol, 2.0 equiv.) was used. The reaction time was 90 min under 366 nm light. The product was isolated through silica gel column chromatography (6% to 20% ethyl acetate-petroleum ether) as a white solid:  $R_f$  = 0.5 (20% ethyl acetate-petroleum ether); m.p. 86 - 88 °C;  $[\alpha]_D^{20}$  -24.1 (c 0.30, DCM);  $^1\text{H}$  NMR (400 MHz,  $\text{CDCl}_3$ )  $\delta$  7.71 (d,  $J$  = 8.2 Hz, 2H), 7.66 (d,  $J$  = 8.2 Hz, 2H), 6.73 (d,  $J$  = 8.9 Hz, 1H), 6.69 (d,  $J$  = 8.9 Hz, 1H), 5.34 (s, 1H), 4.83 (s, 1H), 3.83 (s, 3H), 3.79 (s, 3H), 2.80 (dd,  $J$  = 17.8, 5.0 Hz, 1H), 2.53 – 2.39 (m, 1H), 2.31 (dd,  $J$  = 17.8, 11.9 Hz, 1H), 1.16 (s, 3H), 1.06 (d,  $J$  = 6.6 Hz, 3H) ppm;  $^{13}\text{C}$  NMR (100 MHz,  $\text{CDCl}_3$ )  $\delta$  212.3, 152.2, 151.2, 144.9, 131.5 (q,  $J$  = 32.5 Hz, 1C), 127.1, 126.7 (2C), 126.0, 125.0 (q,  $J$  = 3.8 Hz, 2C), 122.5, 108.5, 108.2, 74.3, 56.0, 55.8, 55.6, 33.3, 29.5, 16.6, 9.8 ppm; IR  $\nu_{\text{max}}$  3055, 1751, 1483, 1267, 1085, 744, 677  $\text{cm}^{-1}$ ; HRMS–ESI ( $m/z$ ):  $[\text{M}+\text{Na}]^+$  calcd for  $\text{C}_{22}\text{H}_{23}\text{F}_3\text{O}_4\text{Na}$ , 431.1441; found, 431.1436; Enantiomeric excess: 99%, determined by HPLC (Daicel Chiralpak OD-H, hexane/isopropanol = 85/15, flow rate 0.8 mL/min,  $T$  = 25 °C, 230 nm):  $t_R$  = 7.497 min (minor),  $t_R$  = 9.044 min (major).

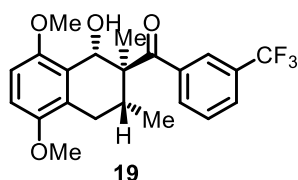

**19** (57.2 mg) was prepared according to general procedure in 47% yield. DABCO (0.60 mmol, 2.0 equiv.) was used. The reaction time was 90 min under 366 nm light. The product was isolated through silica gel column chromatography (6% to 20% ethyl acetate-petroleum ether) as a white solid:  $R_f$  = 0.38 (20% ethyl acetate-petroleum ether); m.p. 108 - 110 °C;  $[\alpha]_D^{20}$  -26.8 (c 0.04, DCM);  $^1\text{H}$  NMR (500 MHz,  $\text{CDCl}_3$ )  $\delta$  7.89 (s, 1H), 7.81 (d,  $J$  = 7.8 Hz, 1H), 7.69 (d,  $J$  = 8.1 Hz, 1H), 7.53 (t,  $J$  = 7.8 Hz, 1H), 6.73 (d,  $J$  = 8.9 Hz, 1H), 6.69 (d,  $J$  = 8.9 Hz, 1H), 5.35 (s, 1H), 4.83 (d,  $J$  = 1.2 Hz, 1H), 3.84 (s, 3H), 3.79 (s, 3H), 2.80 (dd,  $J$  = 18.1, 5.2 Hz, 1H), 2.52 – 2.42 (m, 1H), 2.38 – 2.24 (m, 1H), 1.17 (s, 3H), 1.06 (d,  $J$  = 6.7 Hz, 3H) ppm;  $^{13}\text{C}$  NMR (125 MHz,  $\text{CDCl}_3$ )  $\delta$  211.9, 152.2, 151.1, 142.1, 130.3 (q,  $J$  = 32.3 Hz, 1C), 129.7, 128.5, 127.1, 126.5 (q,  $J$  = 4.0 Hz, 1C), 126.0, 123.5 (q,  $J$  = 4.0 Hz, 1C), 122.8, 108.5, 108.2, 74.4, 55.9, 55.8, 55.6, 33.5, 29.5, 16.6, 10.0 ppm; IR  $\nu_{\text{max}}$  3055, 1751, 1707, 1483, 1109, 746  $\text{cm}^{-1}$ ; HRMS–ESI ( $m/z$ ):  $[\text{M}+\text{Na}]^+$  calcd for  $\text{C}_{22}\text{H}_{23}\text{F}_3\text{O}_4\text{Na}$ , 431.1441; found, 431.1435; Enantiomeric excess: 99%, determined by HPLC (Daicel Chiralpak IG, hexane/isopropanol = 70/30, flow rate 0.8 mL/min,  $T$  = 25 °C, 230 nm):  $t_R$  = 7.045 min (major),  $t_R$  = 9.123 min (minor).

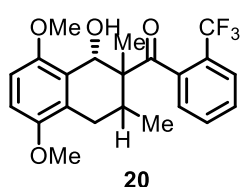

**20** (57.2 mg, dr = 1.8:1) was prepared according to general procedure in 54% yield. DABCO (0.60 mmol, 2.0 equiv.) was used. The reaction time was 90 min under 366 nm light. The product was isolated through silica gel column chromatography (6% to 20% ethyl acetate-petroleum ether) to give **20a** (20.4 mg, 19%) and **20b** (36.8 mg, 35%) as a yellow solid.

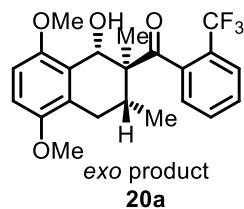

**20a** (the relative configuration was determined by NOESY spectra)  $R_f$  = 0.33 (20% ethyl acetate-petroleum ether); m.p. 99 - 101 °C;  $[\alpha]_D^{20}$  -8.2 (c 0.056, DCM);  $^1\text{H}$  NMR (400 MHz,  $\text{CDCl}_3$ )  $\delta$  7.78 – 7.69 (m, 2H), 7.57 – 7.46 (m, 2H), 6.71 (d,  $J$  = 9.5 Hz, 1H), 6.69 (d,  $J$  = 9.5 Hz, 1H), 5.24 (s, 1H), 4.49 (d,  $J$  = 1.6 Hz, 1H), 3.81 (s, 3H), 3.79 (s, 3H), 2.78 (dd,  $J$  = 16.8, 3.6 Hz, 1H), 2.49 – 2.33 (m, 2H), 1.21 (s, 3H), 1.11 (d,  $J$  = 6.3 Hz, 3H) ppm;  $^{13}\text{C}$  NMR (125 MHz,  $\text{CDCl}_3$ )  $\delta$  210.6, 152.0, 150.9, 130.5, 129.4, 129.1, 128.1, 127.9 (q,  $J$  = 32.1 Hz, 1C), 127.6, 127.4 (q,  $J$  = 4.9 Hz, 1C), 126.5, 126.2, 108.11, 108.07, 73.7, 56.1, 55.61, 55.56, 33.7, 29.5, 16.6, 10.7 ppm; IR  $\nu_{\text{max}}$  3055, 1707, 1483, 1421, 1317, 1111, 746  $\text{cm}^{-1}$ ; HRMS–ESI ( $m/z$ ):  $[\text{M}+\text{Na}]^+$  calcd for  $\text{C}_{22}\text{H}_{23}\text{F}_3\text{O}_4\text{Na}$ , 431.1441; found, 431.1432; Enantiomeric excess: 98%, determined by HPLC (Daicel Chiralpak IG, hexane/isopropanol = 70/30, flow rate 0.8 mL/min,  $T$  = 25 °C, 230 nm):  $t_R$  = 7.302 min (major),  $t_R$  = 9.260 min (minor).

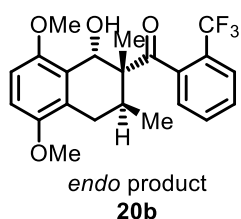

**20b** (the relative configuration was determined by NOESY spectra)  $R_f$  = 0.18 (20% ethyl acetate-petroleum ether); m.p. 120 - 122 °C;  $[\alpha]_D^{20}$  -13.1 (c 0.19, DCM);  $^1\text{H}$  NMR (400 MHz,  $\text{CDCl}_3$ )  $\delta$  7.73 – 7.66 (m, 2H), 7.52 (t,  $J$  = 7.6 Hz, 1H), 7.35 (t,  $J$  = 7.7 Hz, 1H), 6.75 (s, 2H), 5.12 (d,  $J$  = 2.3 Hz, 1H), 4.34 (dd,  $J$  = 12.2, 5.5 Hz, 1H), 3.86 (s, 3H), 3.76 (s, 3H), 3.55 (s, 1H), 3.15 (dd,  $J$  = 18.5, 5.5 Hz, 1H), 2.81 (dd,  $J$  = 18.5, 12.2 Hz, 1H), 1.78 (s, 3H), 1.32 (s, 3H) ppm;  $^{13}\text{C}$  NMR (125 MHz,  $\text{CDCl}_3$ )  $\delta$  213.1, 151.9, 150.7, 143.4, 131.6, 129.3 (q,  $J$  = 28.9 Hz, 1C), 128.8, 126.6 (q,  $J$  = 6.1 Hz, 1C), 126.5, 126.2, 125.5, 124.4 (d,  $J$  = 274.4 Hz, 1C), 109.1, 108.3, 70.3, 56.0, 55.5, 54.8, 33.6, 30.5, 27.5, 16.3 ppm; IR  $\nu_{\text{max}}$  3055, 1707, 1483, 1421, 1317, 1111, 746  $\text{cm}^{-1}$ ; HRMS–ESI ( $m/z$ ):  $[\text{M}+\text{Na}]^+$  calcd for  $\text{C}_{22}\text{H}_{23}\text{F}_3\text{O}_4\text{Na}$ , 431.1441; found, 431.1432; Enantiomeric excess: 92%, determined by HPLC (Daicel Chiralpak IG, hexane/isopropanol = 70/30, flow rate 0.8 mL/min,  $T$  = 25 °C, 230 nm):  $t_R$  = 16.068 min (minor),  $t_R$  = 30.321 min (major).

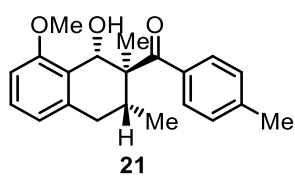

**21** (46 mg) was prepared according to general procedure in 47% yield. DABCO (0.60 mmol, 2.0 equiv.) was used. The reaction time was 90 min under 366 nm light. The product was isolated through silica gel column chromatography (6% to 20% ethyl acetate-petroleum ether) as a white solid:  $R_f$  = 0.55 (20% ethyl acetate-petroleum ether); m.p. 120 – 122 °C;  $[\alpha]_D^{20}$  -5.58 (c 0.74, DCM);  $^1\text{H}$  NMR (400 MHz,  $\text{CDCl}_3$ )  $\delta$  7.59 (d,  $J$  = 8.0 Hz, 2H), 7.21 (d,  $J$  = 8.0 Hz, 2H), 7.15 (t,  $J$  = 8.0 Hz, 1H), 6.78 – 6.71 (m, 2H), 5.49 (s, 1H), 4.50 (d,  $J$  = 1.5 Hz, 1H), 3.85 (s, 3H), 2.74 – 2.66 (m, 2H), 2.65 – 2.53 (m, 1H), 2.38 (s, 3H), 1.24 (s, 3H), 1.02 (d,  $J$  = 6.4 Hz, 3H) ppm;  $^{13}\text{C}$  NMR (100 MHz,  $\text{CDCl}_3$ )  $\delta$  211.2, 158.5, 140.4, 138.2, 137.3, 128.6 (2C), 127.6, 127.0 (2C), 126.4, 121.5, 108.3, 73.7, 56.1, 55.4, 34.9, 33.9, 21.4, 16.4, 10.3 ppm; IR  $\nu_{\text{max}}$  2964, 1583, 1469, 1257, 1083, 1016, 744  $\text{cm}^{-1}$ ; HRMS–ESI ( $m/z$ ):  $[\text{M}+\text{Na}]^+$  calcd for  $\text{C}_{21}\text{H}_{24}\text{O}_3\text{Na}$ , 347.1618; found, 347.1613; Enantiomeric excess: 99.7%, determined by HPLC (Daicel Chiralpak IG, hexane/isopropanol = 75/25, flow rate 0.8 mL/min,  $T$  = 25 °C, 230 nm):  $t_R$  = 19.337 min (major),  $t_R$  = 27.734 min (minor).

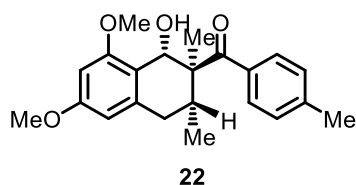

**22** (46.5 mg) was prepared according to general procedure in 44% yield. DABCO (0.60 mmol, 2.0 equiv.) was used. The reaction time was 90 min under 366 nm light. The product was isolated through silica gel column chromatography (6% to 20% ethyl acetate-petroleum ether) as a white solid:  $R_f$  = 0.52 (30% ethyl acetate-petroleum ether); m.p. 74 - 76 °C;  $[\alpha]_D^{20}$  -14.8 (c 0.42, DCM);  $^1\text{H}$  NMR (500 MHz,  $\text{CDCl}_3$ )  $\delta$  7.58 (d,  $J$  = 8.2 Hz, 2H), 7.20 (d,  $J$  = 7.9 Hz, 2H), 6.33 (d,  $J$  = 2.3 Hz, 1H), 6.26 (d,  $J$  = 2.3 Hz, 1H), 5.43 (s, 1H), 4.32 (d,  $J$  = 1.4 Hz, 1H), 3.82 (s, 3H), 3.78 (s, 3H), 2.67 – 2.53 (m, 3H), 2.38 (s, 3H), 1.22 (s, 3H), 1.00 (d,  $J$  = 6.3 Hz, 3H) ppm;  $^{13}\text{C}$  NMR (125 MHz,  $\text{CDCl}_3$ )  $\delta$  211.2, 159.5, 159.2, 140.4, 138.2, 138.0, 128.6 (2C), 127.1 (2C), 119.1, 104.4, 97.1, 73.3, 56.2, 55.5, 55.3, 35.3, 33.9, 21.4, 16.4, 10.4 ppm; IR  $\nu_{\text{max}}$  3053, 2964, 1670, 1610, 1456, 1267, 1149, 833, 738  $\text{cm}^{-1}$ ; HRMS–EI ( $m/z$ ):  $[\text{M}]^+$  calcd for  $\text{C}_{22}\text{H}_{26}\text{O}_4$ , 354.1831; found, 354.1835; Enantiomeric excess: 99.9%, determined by HPLC (Daicel Chiralpak IG, hexane/isopropanol = 70/30, flow rate 0.8 mL/min, T = 25 °C, 230 nm):  $t_R$  = 20.989 min (major),  $t_R$  = 33.791 min (minor).

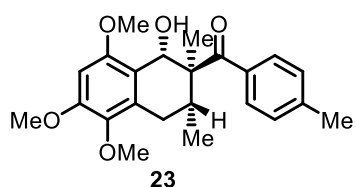

**23** (48.7 mg) was prepared according to general procedure in 42% yield. DABCO (0.60 mmol, 2.0 equiv.) was used. The reaction time was 90 min under 366 nm light. The product was isolated through silica gel column chromatography (6% to 20% ethyl acetate-petroleum ether) as a white solid:  $R_f$  = 0.42 (30% ethyl acetate-petroleum ether); m.p. 95 - 97 °C;  $[\alpha]_D^{20}$  -21.4 (c 0.38, DCM);  $^1\text{H}$  NMR (400 MHz,  $\text{CDCl}_3$ )  $\delta$  7.57 (d,  $J$  = 8.2 Hz, 2H), 7.20 (d,  $J$  = 7.9 Hz, 2H), 6.42 (s, 1H), 5.42 (s, 1H), 4.40 (d,  $J$  = 1.4 Hz, 1H), 3.87 (s, 3H), 3.84 (s, 3H), 3.76 (s, 3H), 2.83 (dd,  $J$  = 16.9, 4.1 Hz, 1H), 2.54 – 2.41 (m, 2H), 2.38 (s, 3H), 1.20 (s, 3H), 1.03 (d,  $J$  = 6.3 Hz, 3H) ppm;  $^{13}\text{C}$  NMR (100 MHz,  $\text{CDCl}_3$ )  $\delta$  211.4, 154.7, 151.5, 140.3, 140.2, 138.3, 131.2, 128.6 (2C), 127.0 (2C), 119.1, 95.5, 73.5, 60.1, 56.0, 55.9, 55.8, 33.6, 29.5, 21.4, 16.5, 10.2 ppm; IR  $\nu_{\text{max}}$  3053, 2303, 1610, 1492, 1236, 1124, 744  $\text{cm}^{-1}$ ; HRMS–ESI ( $m/z$ ):  $[\text{M}+\text{Na}]^+$  calcd for  $\text{C}_{23}\text{H}_{28}\text{O}_5\text{Na}$ , 407.1829; found, 407.1822; Enantiomeric excess: 99.8%, determined by HPLC (Daicel Chiralpak IG, hexane/isopropanol = 70/30, flow rate 0.8 mL/min, T = 25 °C, 230 nm):  $t_R$  = 26.250 min (major),  $t_R$  = 31.271 min (minor).

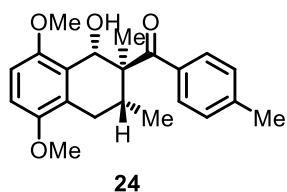

**24** (71.9 mg) was prepared according to general procedure in 68% yield. DABCO (0.60 mmol, 2.0 equiv.) was used. The reaction time was 90 min under 366 nm light. The product was isolated through silica gel column chromatography (6% to 20% ethyl acetate-petroleum ether) as a colorless oil:  $R_f$  = 0.45 (20% ethyl acetate-petroleum ether);  $[\alpha]_D^{20}$  -20.2 (c 0.16, DCM);  $^1\text{H}$  NMR (500 MHz,  $\text{CDCl}_3$ )  $\delta$  7.58 (d,  $J$  = 8.2 Hz, 2H), 7.20 (d,  $J$  = 7.9 Hz, 2H), 6.71 (d,  $J$  = 8.9 Hz, 1H), 6.68 (d,  $J$  = 8.9 Hz, 1H), 5.47 (s, 1H), 4.68 (d,  $J$  = 1.3 Hz, 1H), 3.81 (s, 3H), 3.79 (s, 3H), 2.81 – 2.74 (m, 1H), 2.56 – 2.47 (m, 1H), 2.38 (s, 3H), 2.37 – 2.29 (m, 1H), 1.21 (s, 3H), 1.04 (d,  $J$  = 6.7 Hz, 3H) ppm;  $^{13}\text{C}$  NMR (125 MHz,  $\text{CDCl}_3$ )  $\delta$  211.6, 152.2, 151.1, 140.2, 138.3, 128.5 (2C), 127.5, 126.9 (2C), 126.2, 108.3, 108.0, 73.9, 55.8, 55.7, 55.5, 33.5, 29.5, 21.4, 16.5, 10.0 ppm; IR  $\nu_{\text{max}}$  3055, 1672,

1309, 1267, 1122, 740  $\text{cm}^{-1}$ ; HRMS–ESI ( $m/z$ ):  $[\text{M}+\text{Na}]^+$  calcd for  $\text{C}_{22}\text{H}_{26}\text{O}_4\text{Na}$ , 377.1723; found, 377.1717; Enantiomeric excess: 97%, determined by HPLC (Daicel Chiralpak OD-H, hexane/isopropanol = 85/15, flow rate 0.8 mL/min,  $T = 25\text{ }^\circ\text{C}$ , 230 nm):  $t_{\text{R}} = 10.124\text{ min}$  (minor),  $t_{\text{R}} = 12.489\text{ min}$  (major).

### III. Crystal data and structure refinement for 7

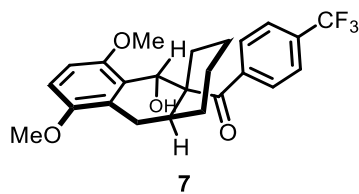

CCDC 1947394

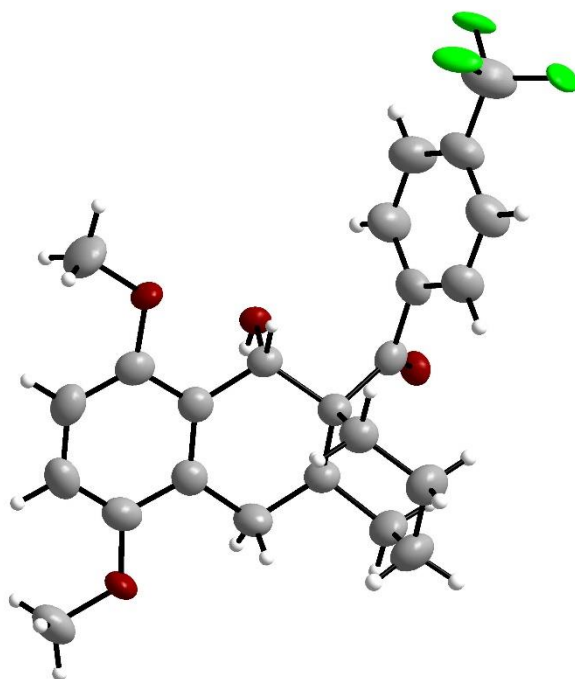

(ellipsoid contour at 50% probability level)

## Crystal data and structure refinement for 7

|                                             |                                                               |
|---------------------------------------------|---------------------------------------------------------------|
| Identification code                         | 7                                                             |
| Empirical formula                           | C <sub>24</sub> H <sub>25</sub> F <sub>3</sub> O <sub>4</sub> |
| Formula weight                              | 434.44                                                        |
| Temperature/K                               | 100.00(10)                                                    |
| Crystal system                              | triclinic                                                     |
| Space group                                 | P-1                                                           |
| a/Å                                         | 10.2397(2)                                                    |
| b/Å                                         | 10.3182(2)                                                    |
| c/Å                                         | 10.7297(3)                                                    |
| $\alpha$ /°                                 | 74.853(2)                                                     |
| $\beta$ /°                                  | 74.200(2)                                                     |
| $\gamma$ /°                                 | 69.720(2)                                                     |
| Volume/Å <sup>3</sup>                       | 1005.55(4)                                                    |
| Z                                           | 2                                                             |
| $\rho$ calc/g/cm <sup>3</sup>               | 1.435                                                         |
| $\mu$ /mm <sup>-1</sup>                     | 0.971                                                         |
| F(000)                                      | 456.0                                                         |
| Crystal size/mm <sup>3</sup>                | 0.43 × 0.38 × 0.36                                            |
| Radiation                                   | CuK $\alpha$ ( $\lambda$ = 1.54184)                           |
| 2 $\theta$ range for data collection/°      | 8.716 to 148.936                                              |
| Index ranges                                | -12 ≤ h ≤ 12, -12 ≤ k ≤ 12, -12 ≤ l ≤ 12                      |
| Reflections collected                       | 21252                                                         |
| Independent reflections                     | 4008 [R <sub>int</sub> = 0.0337, R <sub>sigma</sub> = 0.0195] |
| Data/restraints/parameters                  | 4008/0/283                                                    |
| Goodness-of-fit on F <sup>2</sup>           | 1.041                                                         |
| Final R indexes [I ≥ 2 $\sigma$ (I)]        | R <sub>1</sub> = 0.0357, wR <sub>2</sub> = 0.0899             |
| Final R indexes [all data]                  | R <sub>1</sub> = 0.0372, wR <sub>2</sub> = 0.0910             |
| Largest diff. peak/hole / e Å <sup>-3</sup> | 0.26/-0.25                                                    |

#### IV. Crystal data and structure refinement for 7a

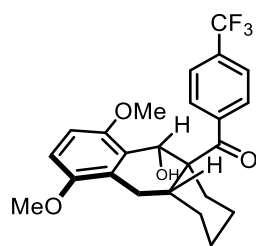

**7a**  
CCDC 1947391

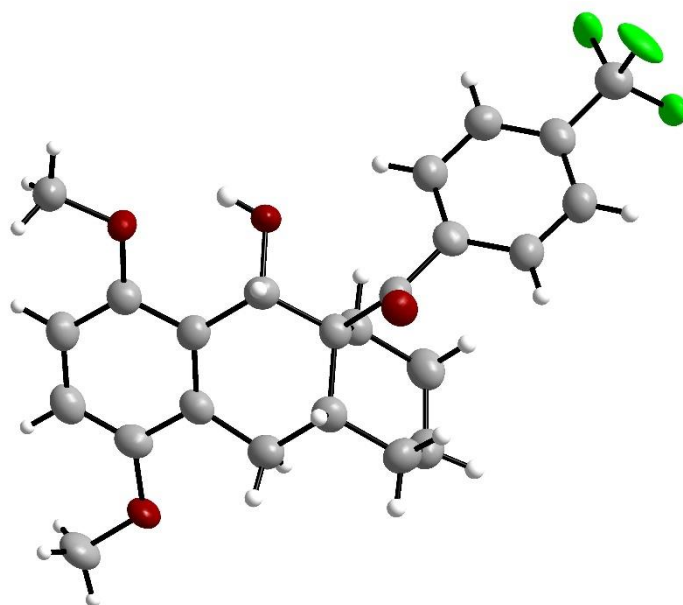

(ellipsoid contour at 50% probability level)



## Crystal data and structure refinement for 7a

|                                             |                                                                |
|---------------------------------------------|----------------------------------------------------------------|
| Identification code                         | <b>7a</b>                                                      |
| Empirical formula                           | C <sub>24</sub> H <sub>25</sub> F <sub>3</sub> O <sub>4</sub>  |
| Formula weight                              | 434.44                                                         |
| Temperature/K                               | 100.00(10)                                                     |
| Crystal system                              | orthorhombic                                                   |
| Space group                                 | P2 <sub>1</sub> 2 <sub>1</sub> 2 <sub>1</sub>                  |
| a/Å                                         | 7.45280(10)                                                    |
| b/Å                                         | 12.18510(10)                                                   |
| c/Å                                         | 22.5826(2)                                                     |
| $\alpha$ /°                                 | 90                                                             |
| $\beta$ /°                                  | 90                                                             |
| $\gamma$ /°                                 | 90                                                             |
| Volume/Å <sup>3</sup>                       | 2050.80(4)                                                     |
| Z                                           | 4                                                              |
| $\rho_{\text{calc}}$ /cm <sup>3</sup>       | 1.407                                                          |
| $\mu$ /mm <sup>-1</sup>                     | 0.953                                                          |
| F(000)                                      | 912.0                                                          |
| Crystal size/mm <sup>3</sup>                | 0.38 × 0.26 × 0.22                                             |
| Radiation                                   | CuK $\alpha$ ( $\lambda$ = 1.54184)                            |
| 2 $\Theta$ range for data collection/°      | 7.83 to 148.952                                                |
| Index ranges                                | -8 ≤ h ≤ 8, -15 ≤ k ≤ 15, -27 ≤ l ≤ 28                         |
| Reflections collected                       | 49662                                                          |
| Independent reflections                     | 4111 [ $R_{\text{int}}$ = 0.1197, $R_{\text{sigma}}$ = 0.0406] |
| Data/restraints/parameters                  | 4111/0/284                                                     |
| Goodness-of-fit on F <sup>2</sup>           | 1.063                                                          |
| Final R indexes [ $I \geq 2\sigma(I)$ ]     | $R_1$ = 0.0370, $wR_2$ = 0.0966                                |
| Final R indexes [all data]                  | $R_1$ = 0.0390, $wR_2$ = 0.0982                                |
| Largest diff. peak/hole / e Å <sup>-3</sup> | 0.25/-0.22                                                     |
| Flack parameter                             | -0.17(7)                                                       |

## V. Crystal data and structure refinement for **9**

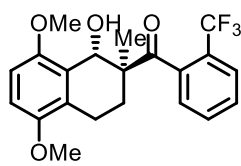

**9**

CCDC 1947389

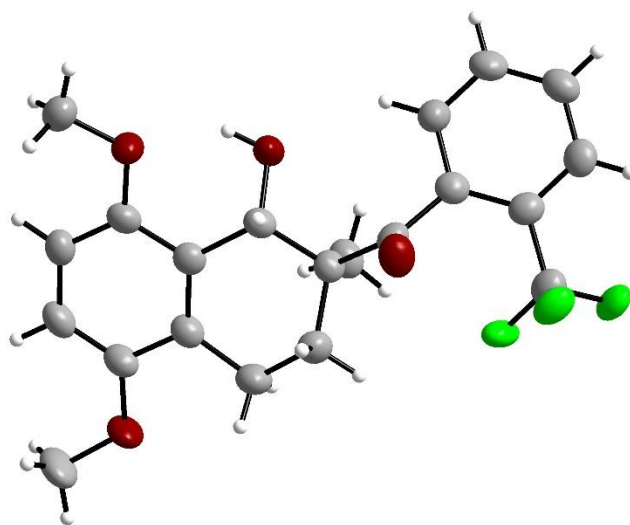

(ellipsoid contour at 50% probability level)

## Crystal data and structure refinement for **9**

|                                                |                                                                |
|------------------------------------------------|----------------------------------------------------------------|
| Identification code                            | <b>9</b>                                                       |
| Empirical formula                              | C <sub>21</sub> H <sub>21</sub> F <sub>3</sub> O <sub>4</sub>  |
| Formula weight                                 | 394.38                                                         |
| Temperature/K                                  | 100.00(10)                                                     |
| Crystal system                                 | orthorhombic                                                   |
| Space group                                    | P2 <sub>1</sub> 2 <sub>1</sub> 2 <sub>1</sub>                  |
| a/Å                                            | 7.01890(10)                                                    |
| b/Å                                            | 10.7355(2)                                                     |
| c/Å                                            | 24.6659(3)                                                     |
| $\alpha/^\circ$                                | 90                                                             |
| $\beta/^\circ$                                 | 90                                                             |
| $\gamma/^\circ$                                | 90                                                             |
| Volume/Å <sup>3</sup>                          | 1858.61(5)                                                     |
| Z                                              | 4                                                              |
| $\rho_{\text{calc}}/\text{cm}^3$               | 1.409                                                          |
| $\mu/\text{mm}^{-1}$                           | 0.992                                                          |
| F(000)                                         | 824.0                                                          |
| Crystal size/mm <sup>3</sup>                   | 0.48 × 0.28 × 0.22                                             |
| Radiation                                      | CuK $\alpha$ ( $\lambda$ = 1.54184)                            |
| 2 $\Theta$ range for data collection/ $^\circ$ | 8.984 to 149.184                                               |
| Index ranges                                   | -8 ≤ h ≤ 8, -13 ≤ k ≤ 13, -30 ≤ l ≤ 30                         |
| Reflections collected                          | 41677                                                          |
| Independent reflections                        | 3767 [ $R_{\text{int}}$ = 0.1067, $R_{\text{sigma}}$ = 0.0365] |
| Data/restraints/parameters                     | 3767/0/260                                                     |
| Goodness-of-fit on F <sup>2</sup>              | 1.050                                                          |
| Final R indexes [ $I \geq 2\sigma(I)$ ]        | $R_1$ = 0.0435, $wR_2$ = 0.1124                                |
| Final R indexes [all data]                     | $R_1$ = 0.0446, $wR_2$ = 0.1134                                |
| Largest diff. peak/hole / e Å <sup>-3</sup>    | 0.32/-0.27                                                     |
| Flack parameter                                | 0.02(7)                                                        |

## VI. NMR and HPLC Spectra

HM-VI-93C-1. 10. fid  
HM-VI-93C-1

7.93  
7.91  
7.68  
7.66  
6.76  
6.74  
6.72  
6.70

5.10  
5.10

3.84  
3.82  
2.91  
2.89  
2.84  
2.82  
2.71  
2.68  
2.66  
2.64  
2.63

1.94  
1.61  
1.59  
1.58  
1.54  
1.53  
1.50  
1.47  
1.44  
1.29  
1.27  
1.26  
1.23

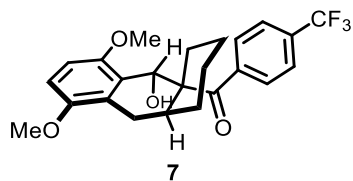

Chemical Formula:  $C_{24}H_{25}F_3O_4$   
400 MHz,  $CDCl_3$

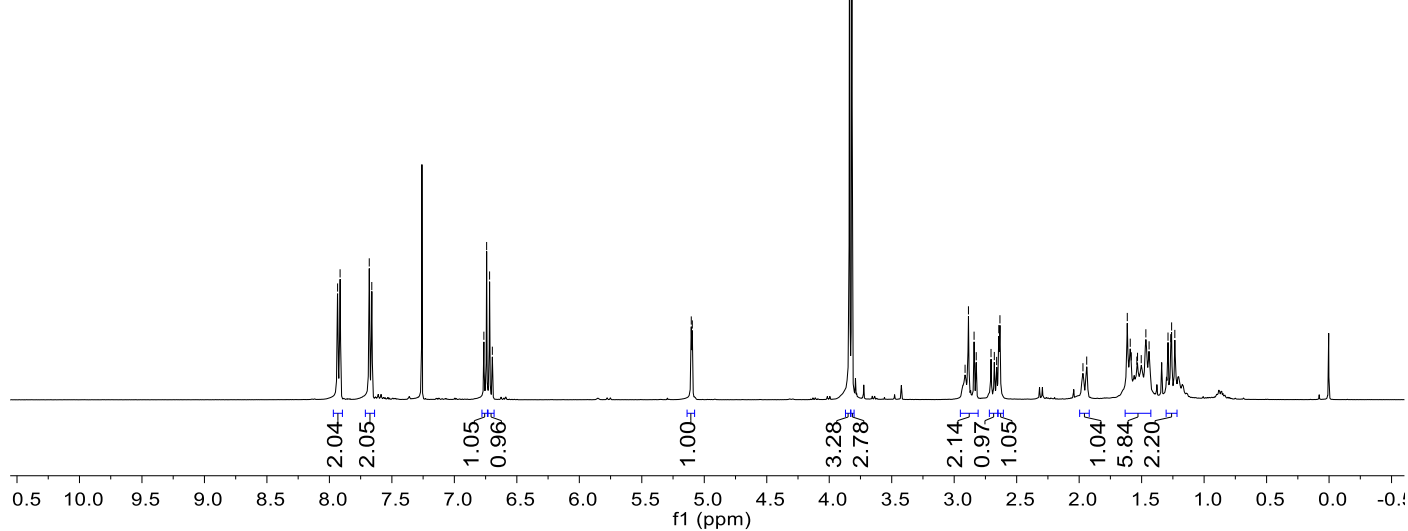

HM-VI-93C-1 C. 12. fid  
HM-VI-93C-1 C

208.59

151.49  
151.13  
144.67  
132.13  
131.80  
127.81  
125.70  
125.63  
125.24  
124.97  
124.93  
124.90  
124.86  
122.53  
108.89  
107.18  
69.06  
55.62  
55.57  
55.12  
27.42  
27.17  
26.51  
24.72  
22.80  
19.55

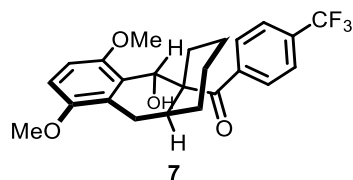

Chemical Formula:  $C_{24}H_{25}F_3O_4$   
100 MHz,  $CDCl_3$

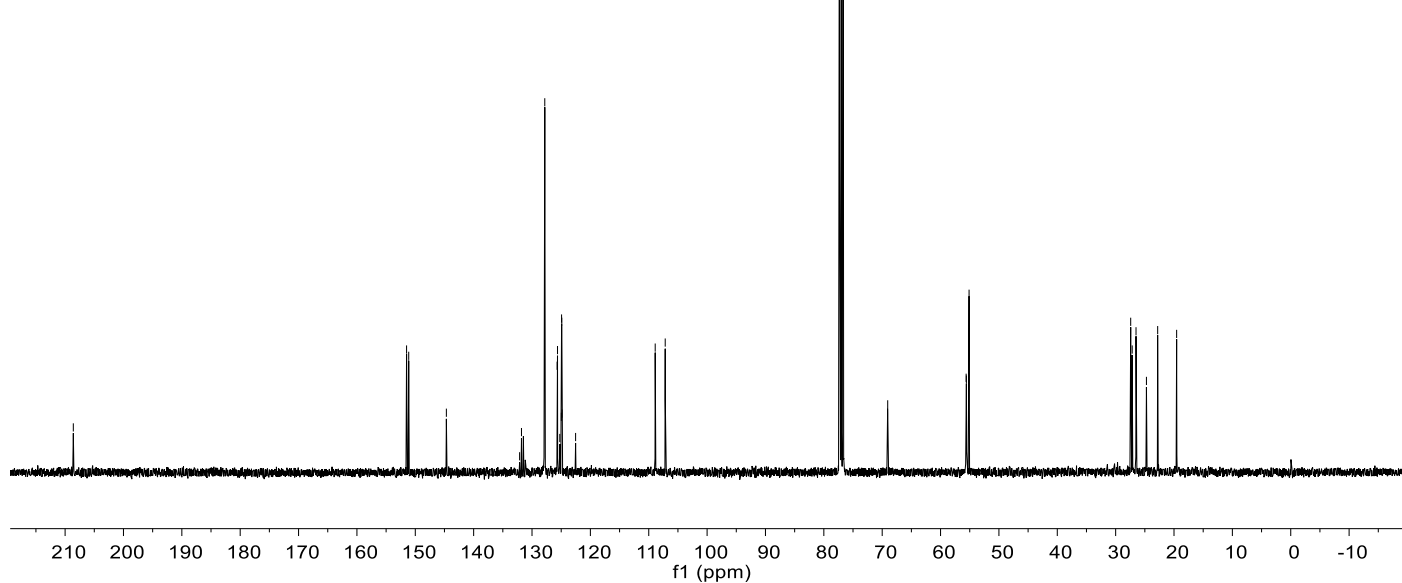

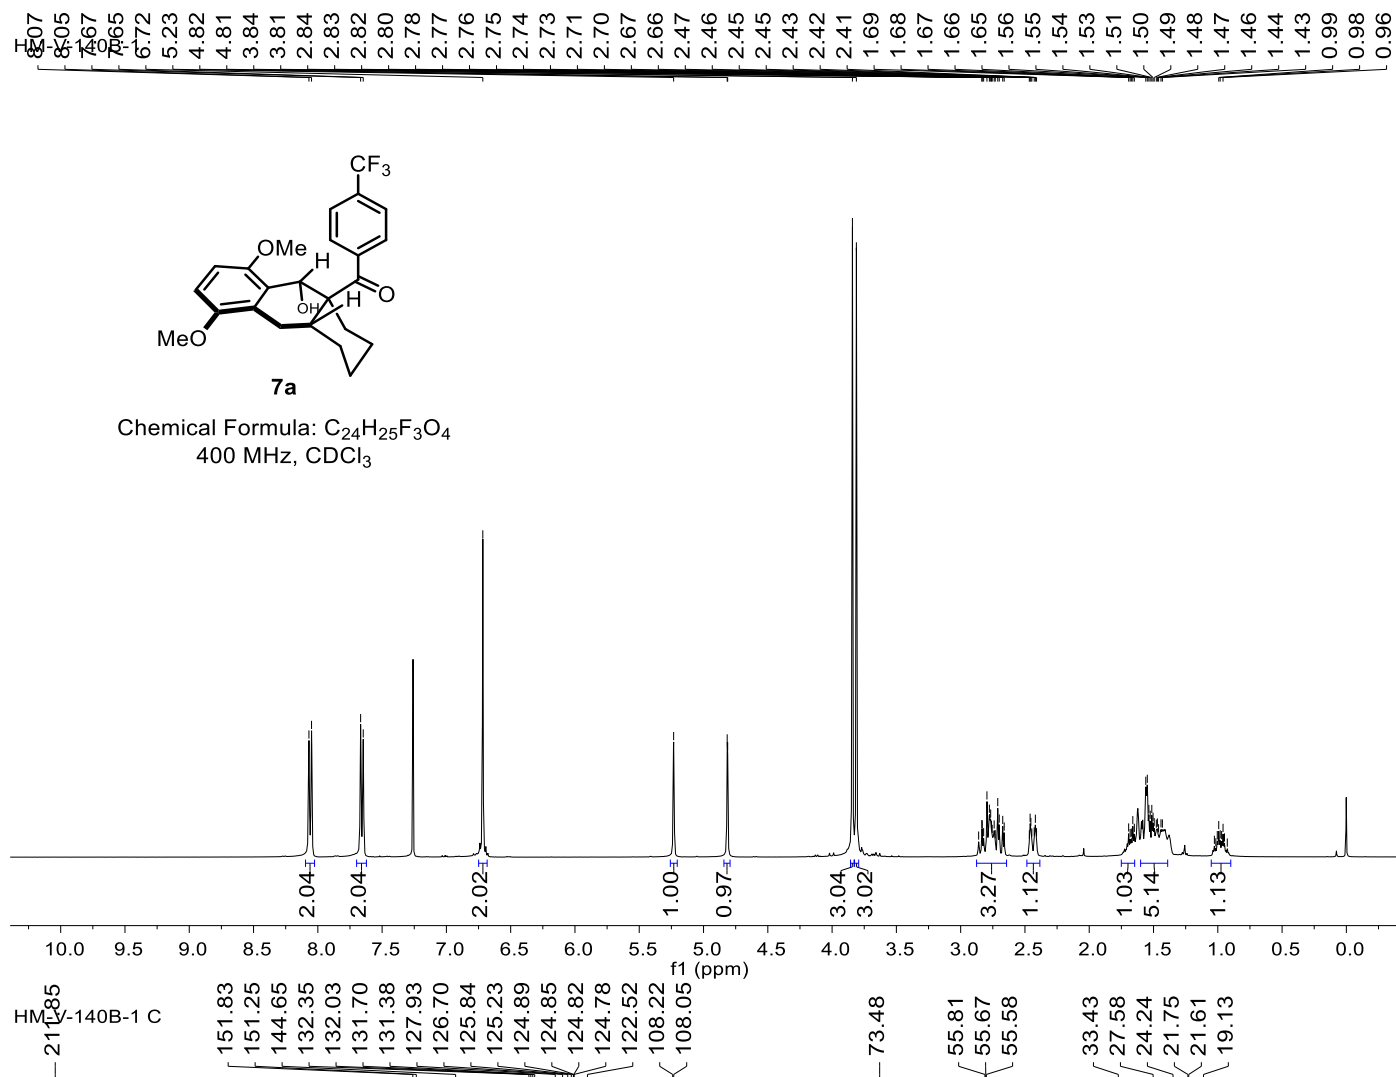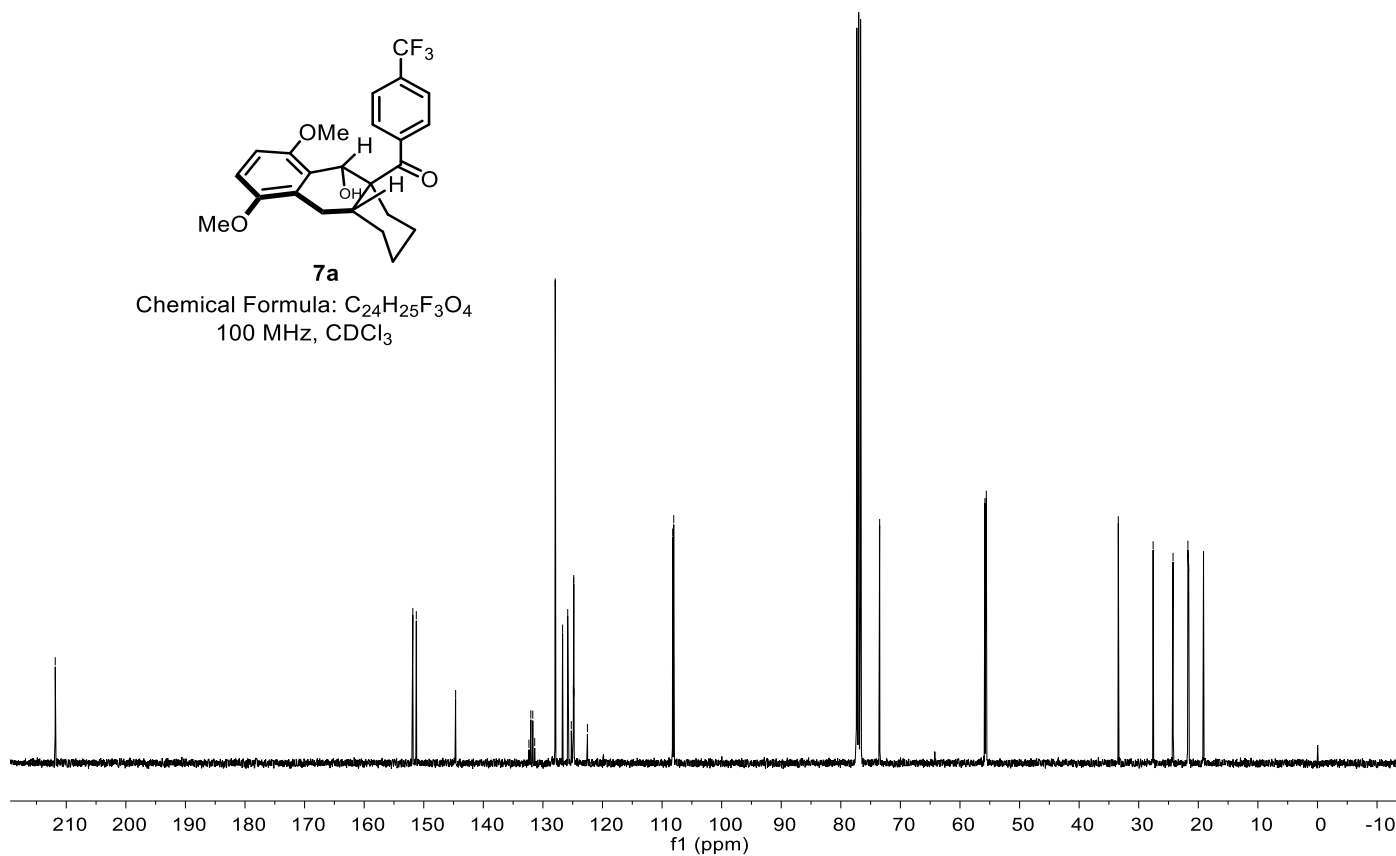

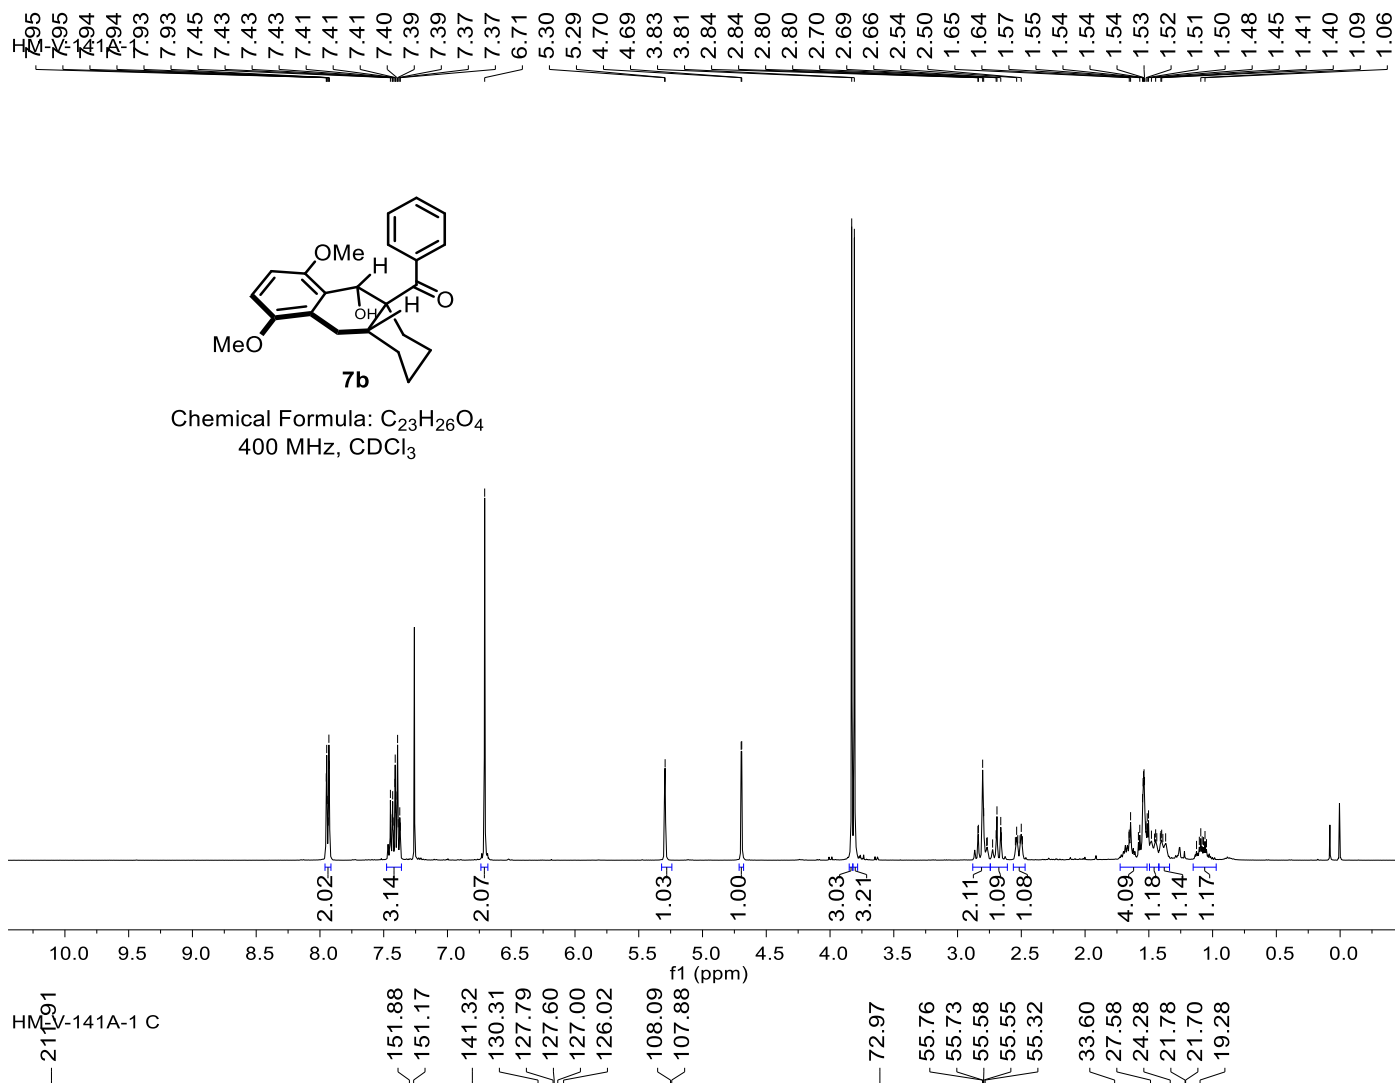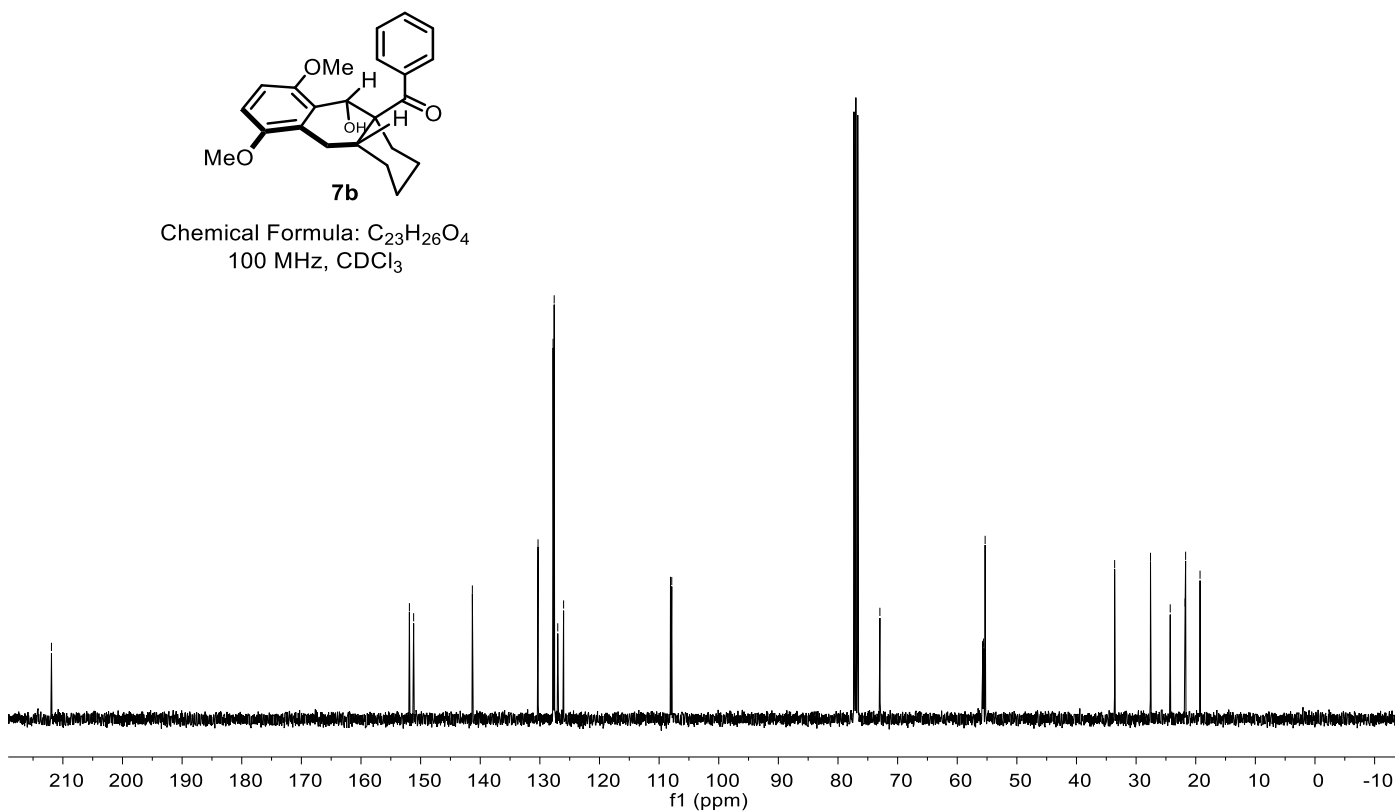

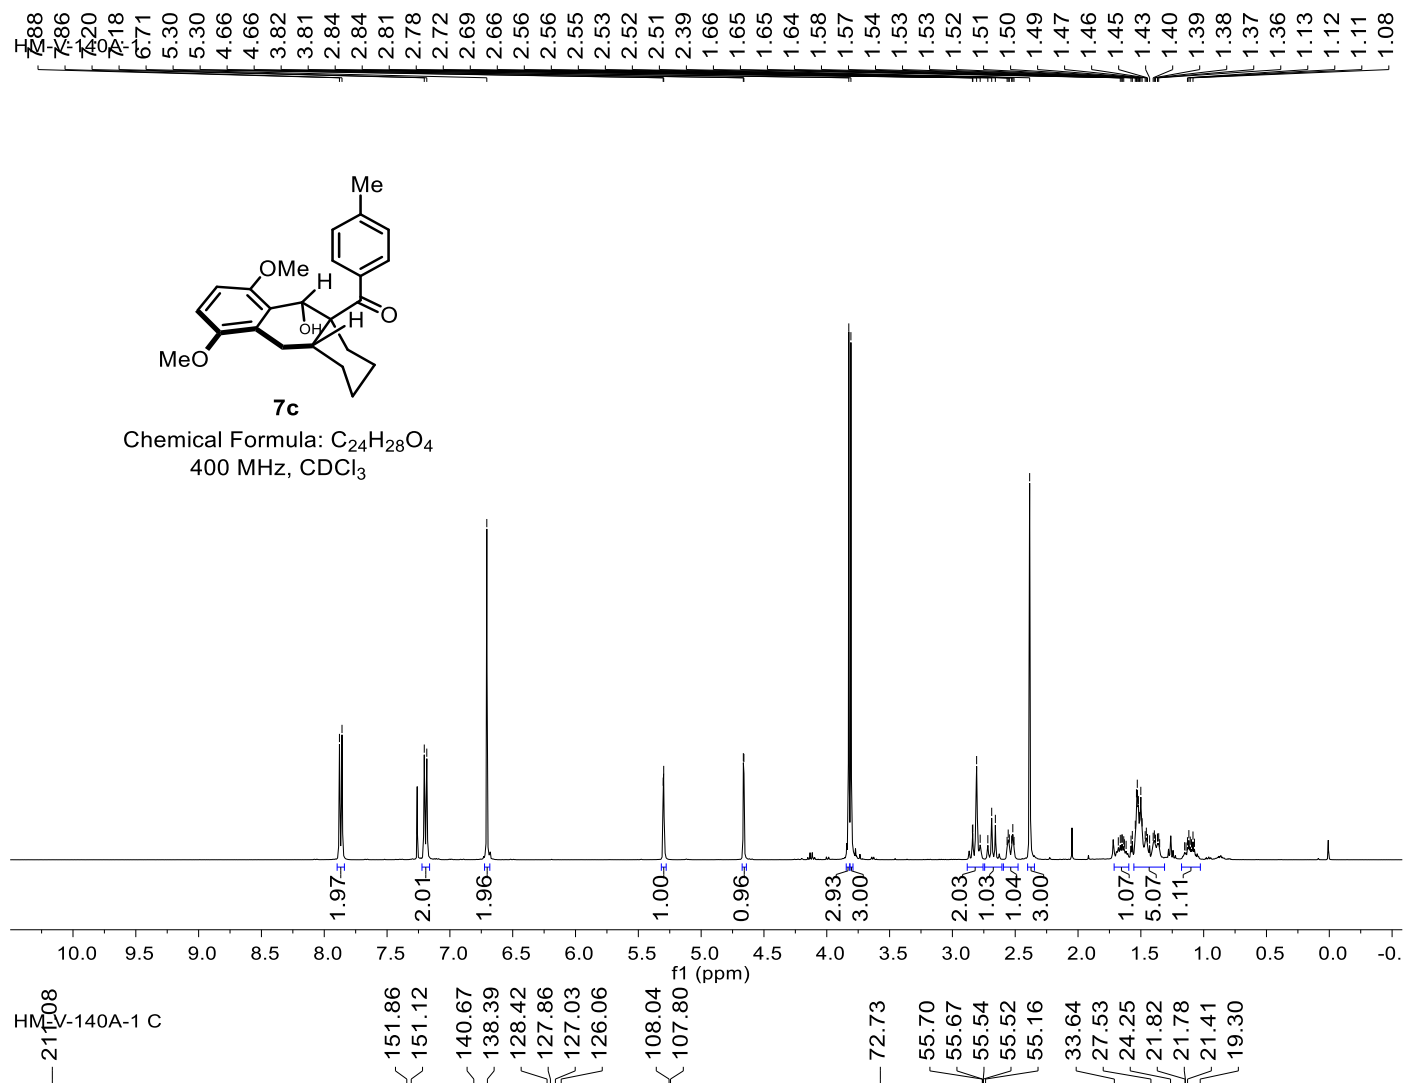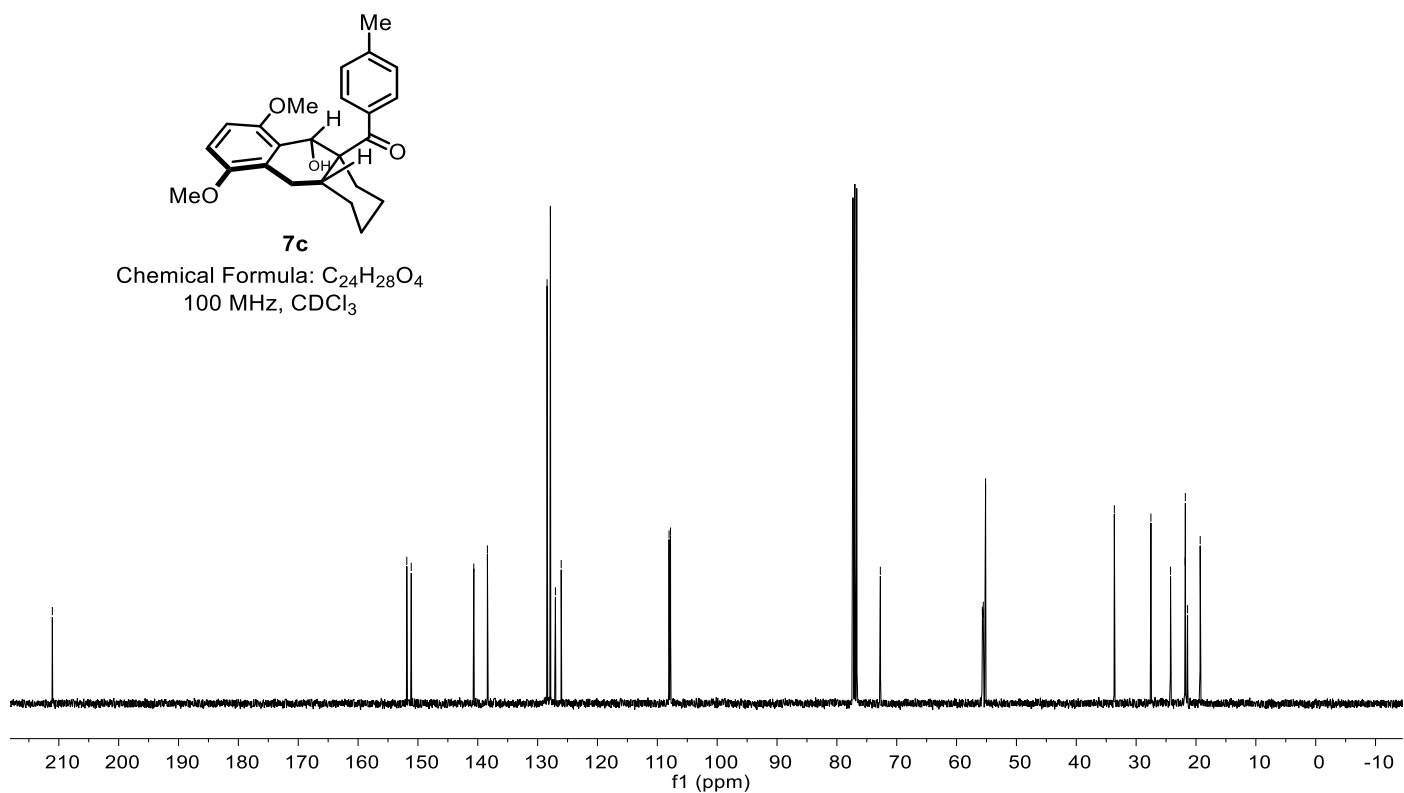

7.80  
7.78  
7.76  
7.69  
7.68  
7.67  
7.57  
7.57  
7.55  
7.55  
7.54  
7.54  
7.50  
7.50  
7.50  
7.49  
7.47  
6.73  
6.72  
6.70  
6.68  
5.37  
4.43  
3.84  
3.78  
2.78  
2.75  
2.74  
2.74  
2.73  
2.65  
2.64  
2.63  
2.63  
2.21  
2.20  
2.19  
2.18  
2.17  
2.17  
2.16  
2.15  
2.02  
2.01  
2.01  
2.00  
1.98  
1.98  
1.22

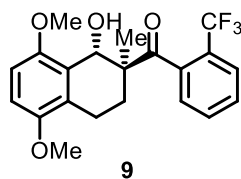

Chemical Formula: C<sub>21</sub>H<sub>21</sub>F<sub>3</sub>O<sub>4</sub>  
500 MHz, CDCl<sub>3</sub>

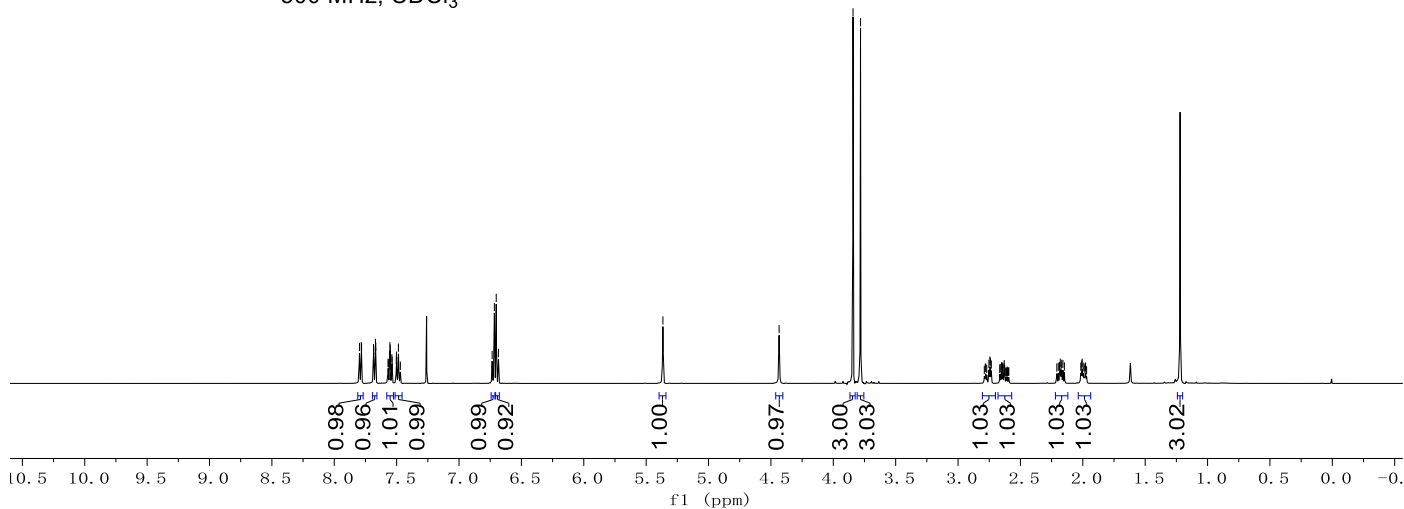

HM-V52B-1  
HM-V52B-1  
211.99  
152.07  
151.26  
139.64  
139.62  
139.60  
139.59  
130.97  
128.73  
127.70  
127.05  
126.80  
126.67  
126.54  
126.46  
126.43  
126.39  
126.35  
126.15  
124.67  
122.50  
108.27  
108.23  
71.48  
55.77  
55.54  
51.47  
29.65  
20.48  
16.09

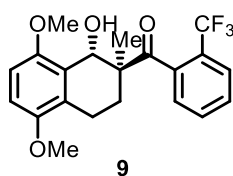

Chemical Formula: C<sub>21</sub>H<sub>21</sub>F<sub>3</sub>O<sub>4</sub>  
125 MHz, CDCl<sub>3</sub>

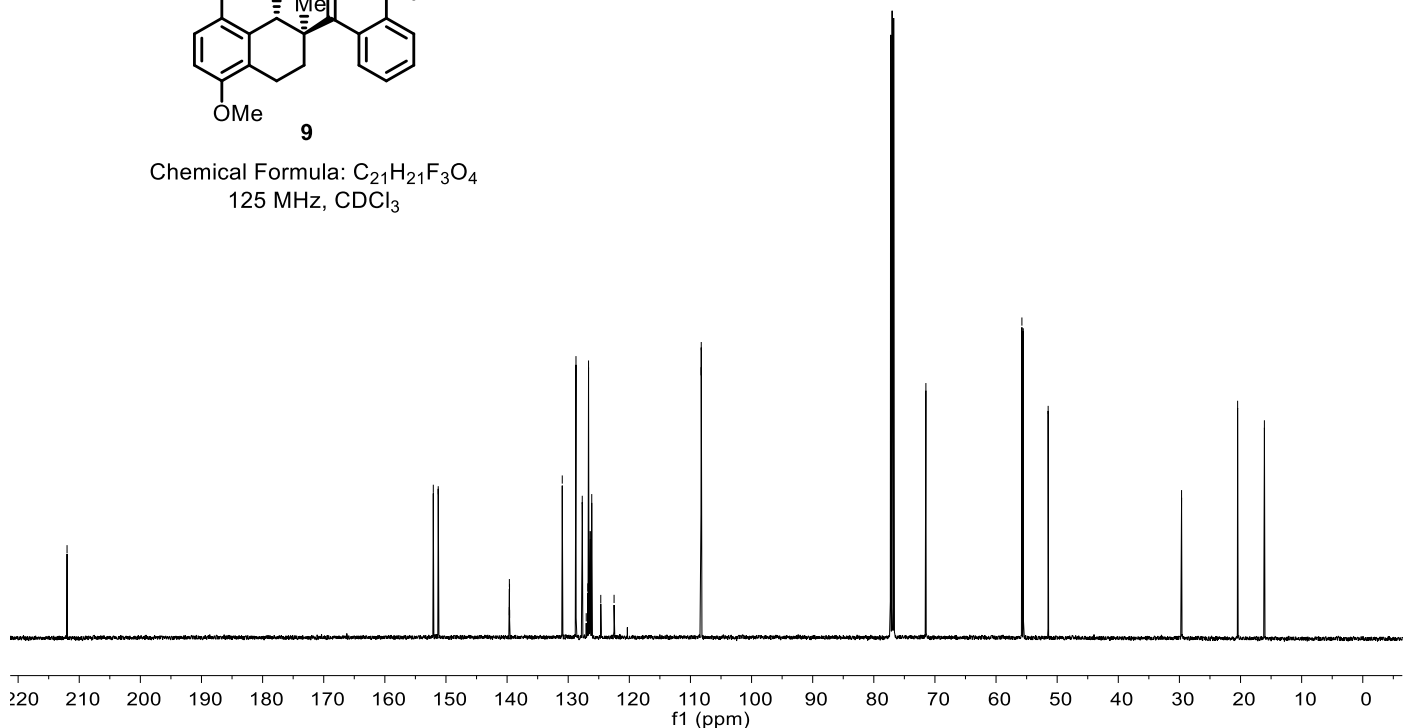



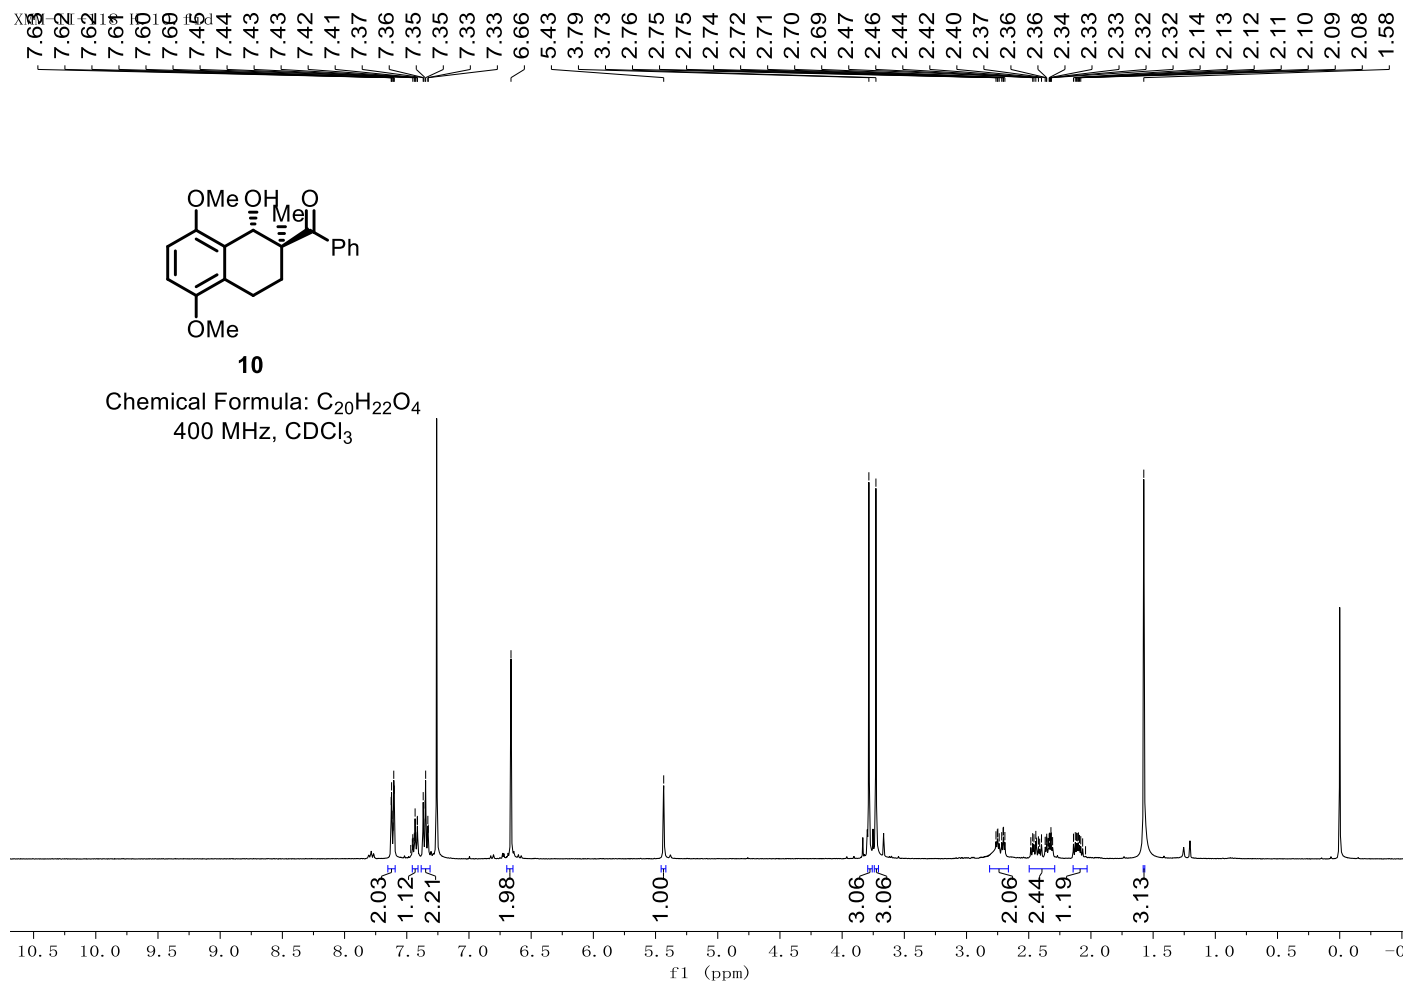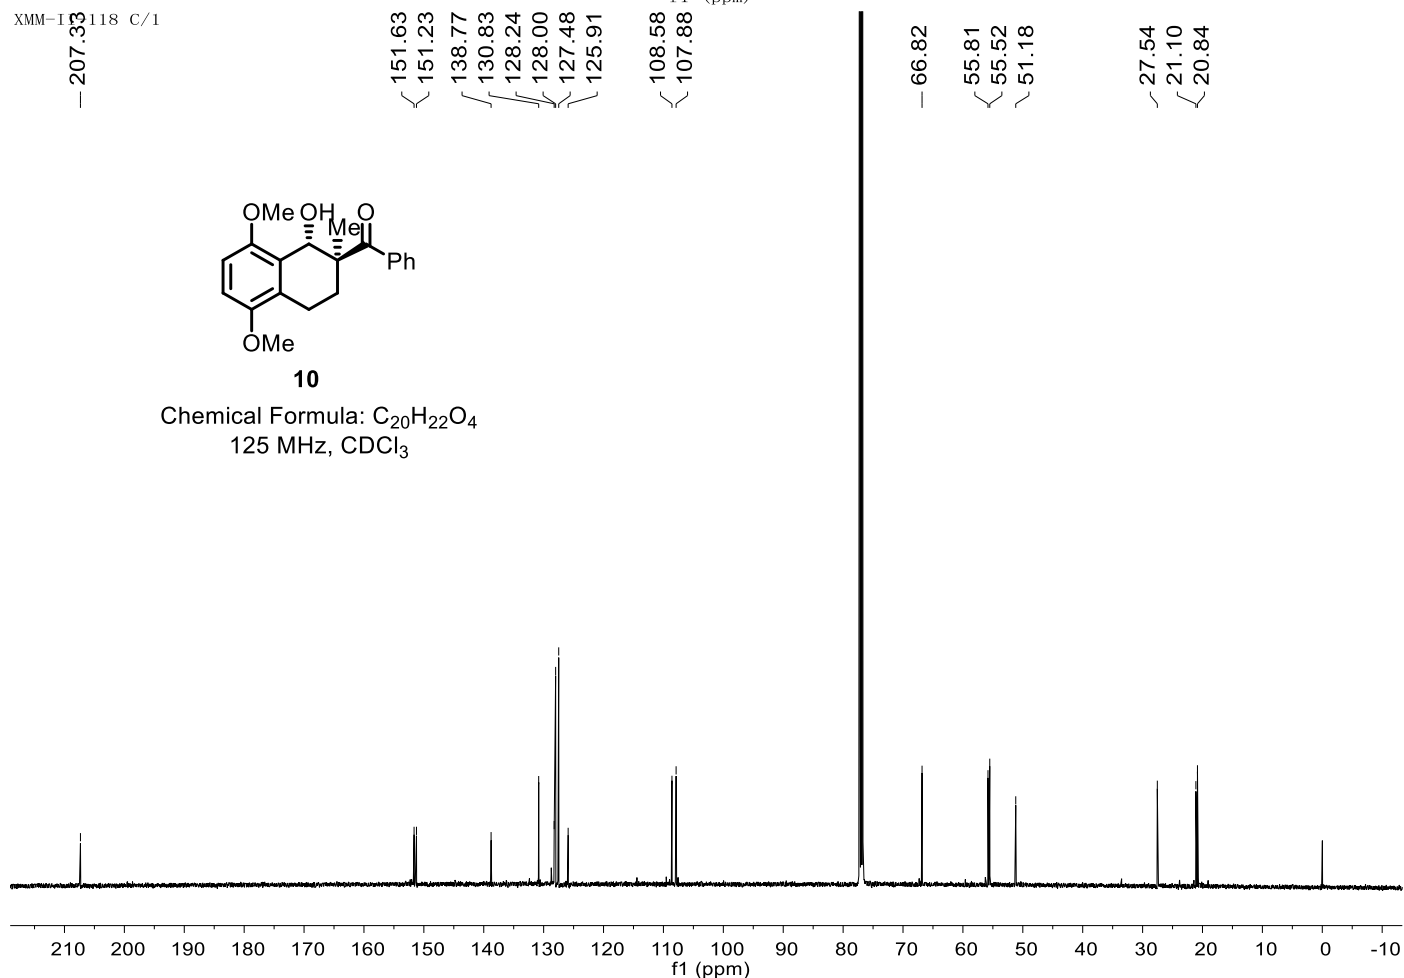

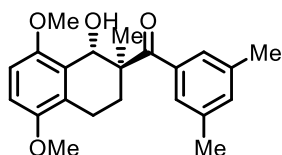**11**

Chemical Formula: C<sub>22</sub>H<sub>26</sub>O<sub>4</sub>  
400 MHz, CDCl<sub>3</sub>

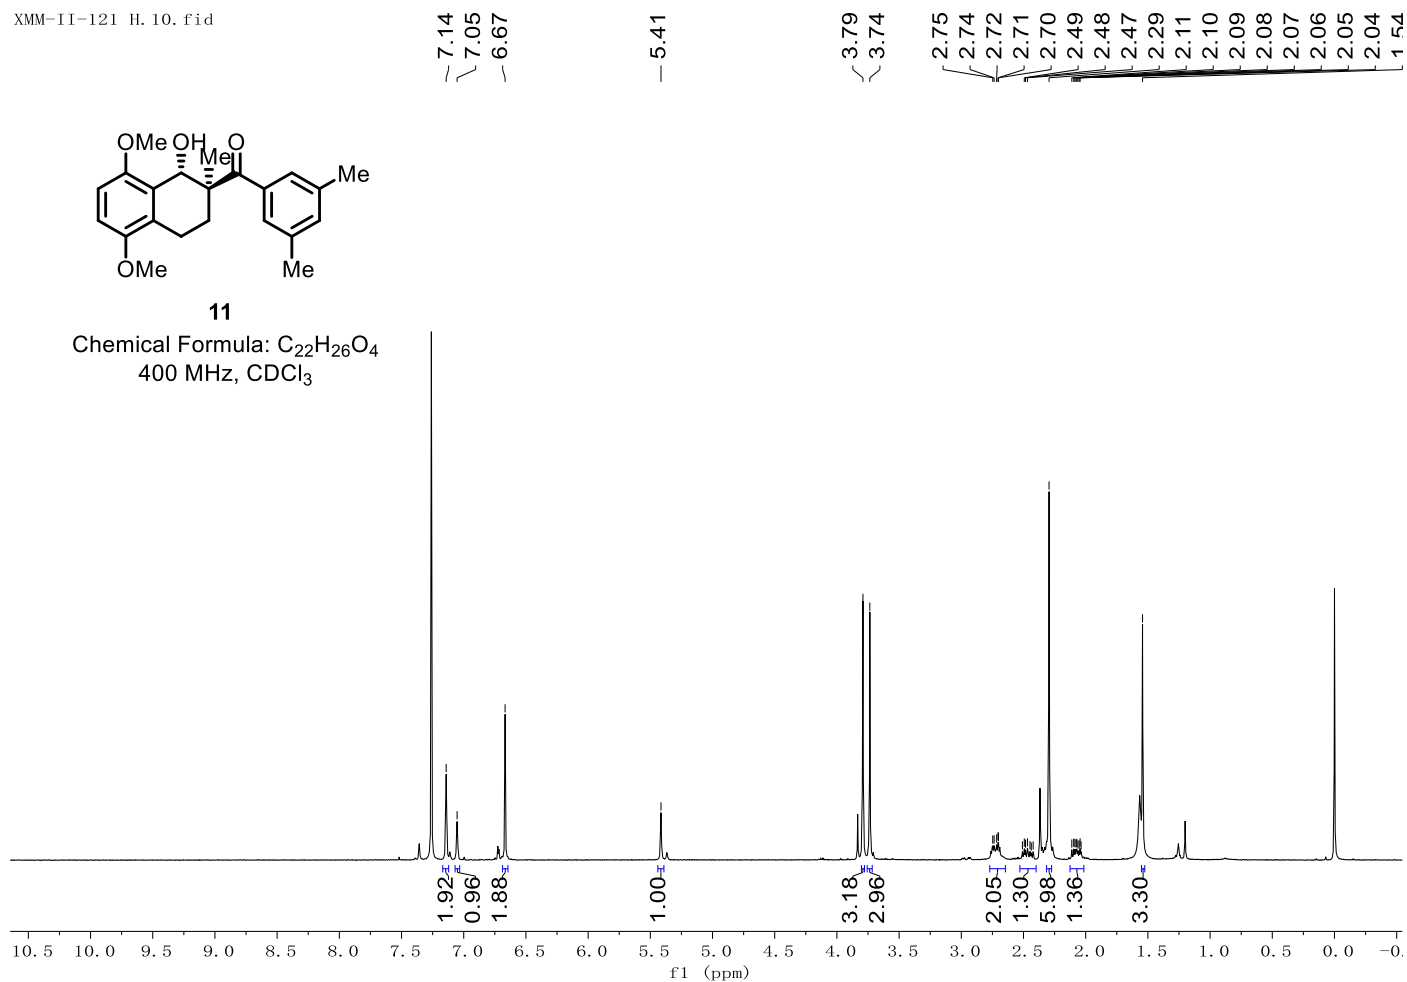

XMM-II-121 C/2

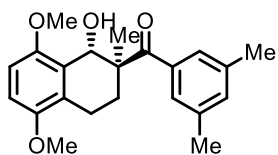**11**

Chemical Formula: C<sub>22</sub>H<sub>26</sub>O<sub>4</sub>  
100 MHz, CDCl<sub>3</sub>

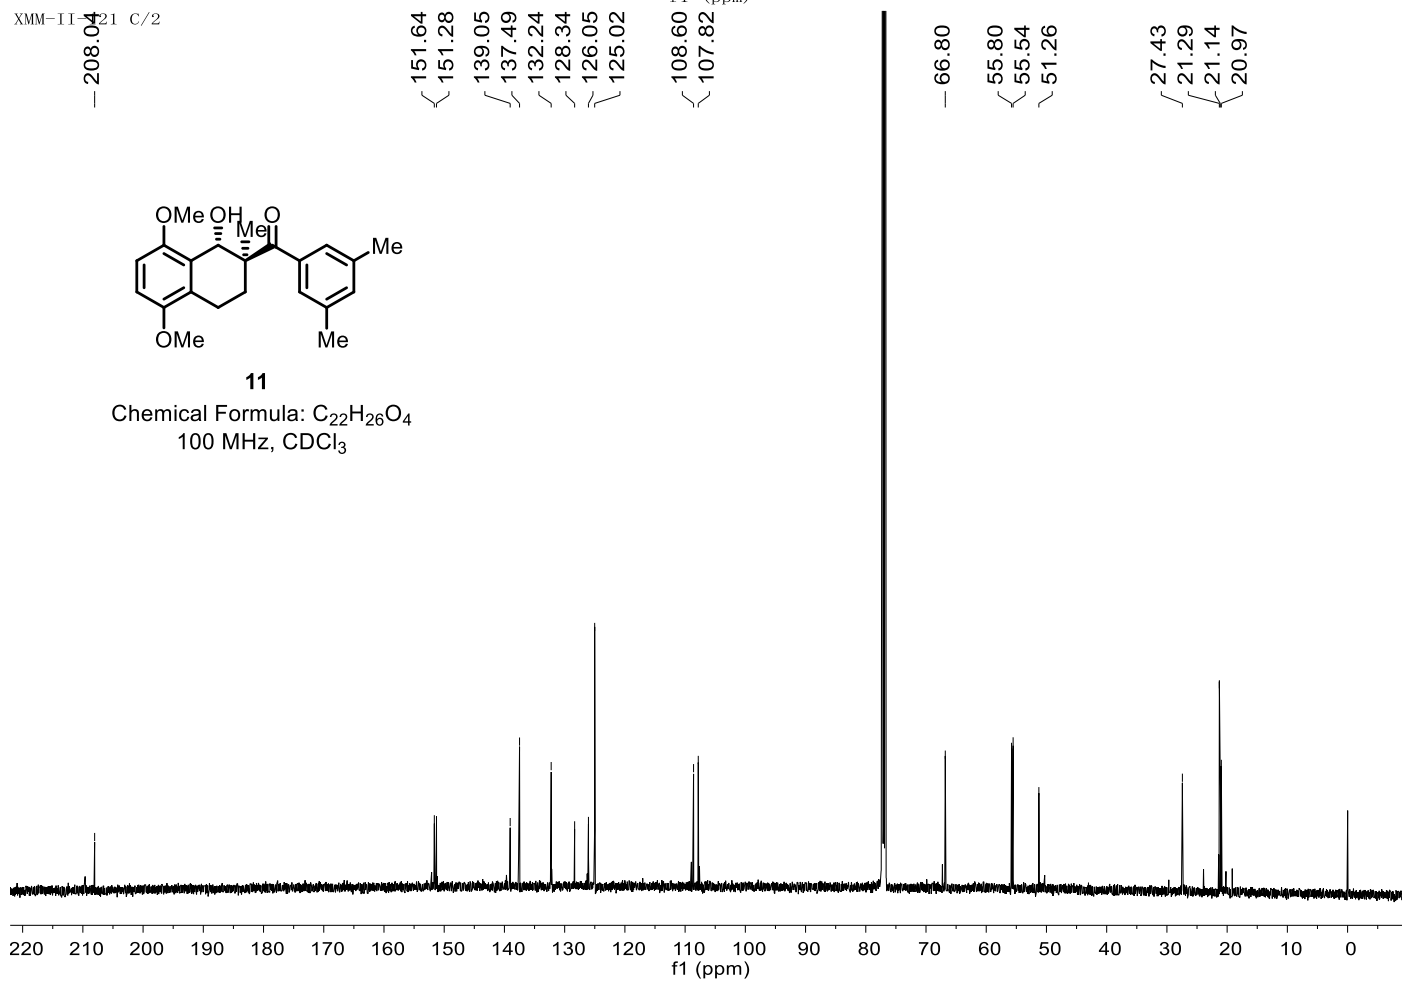

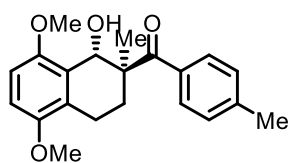**12**

Chemical Formula: C<sub>21</sub>H<sub>24</sub>O<sub>4</sub>  
400 MHz, CDCl<sub>3</sub>

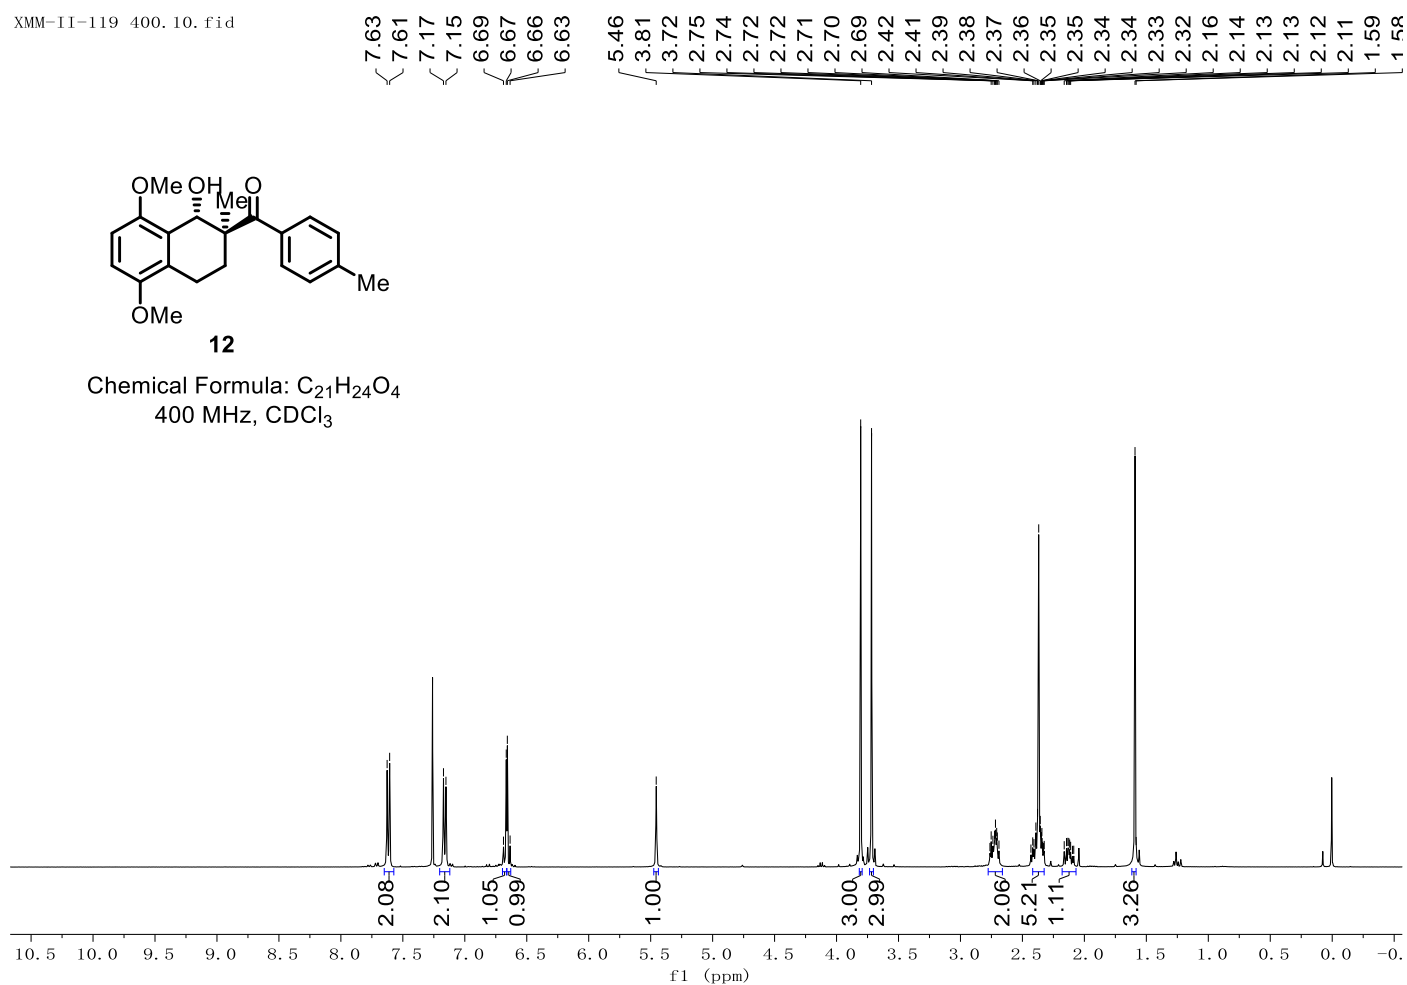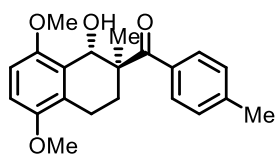**12**

Chemical Formula: C<sub>21</sub>H<sub>24</sub>O<sub>4</sub>  
100 MHz, CDCl<sub>3</sub>

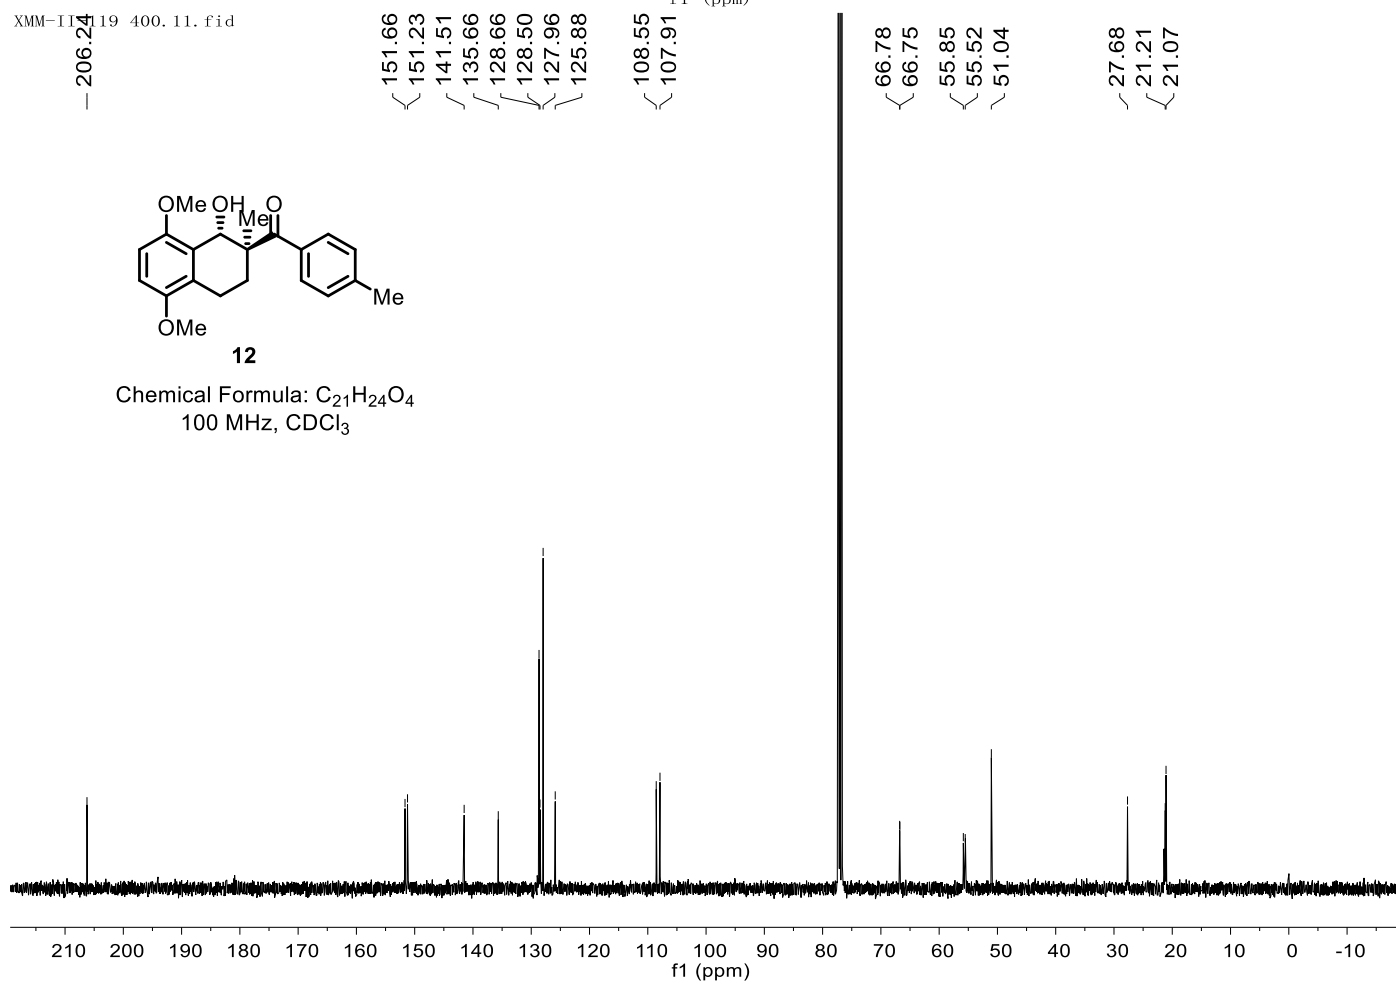

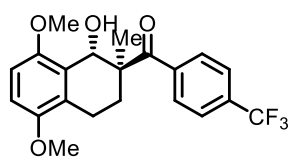**13**

Chemical Formula:  $C_{21}H_{21}F_3O_4$   
500 MHz,  $CDCl_3$

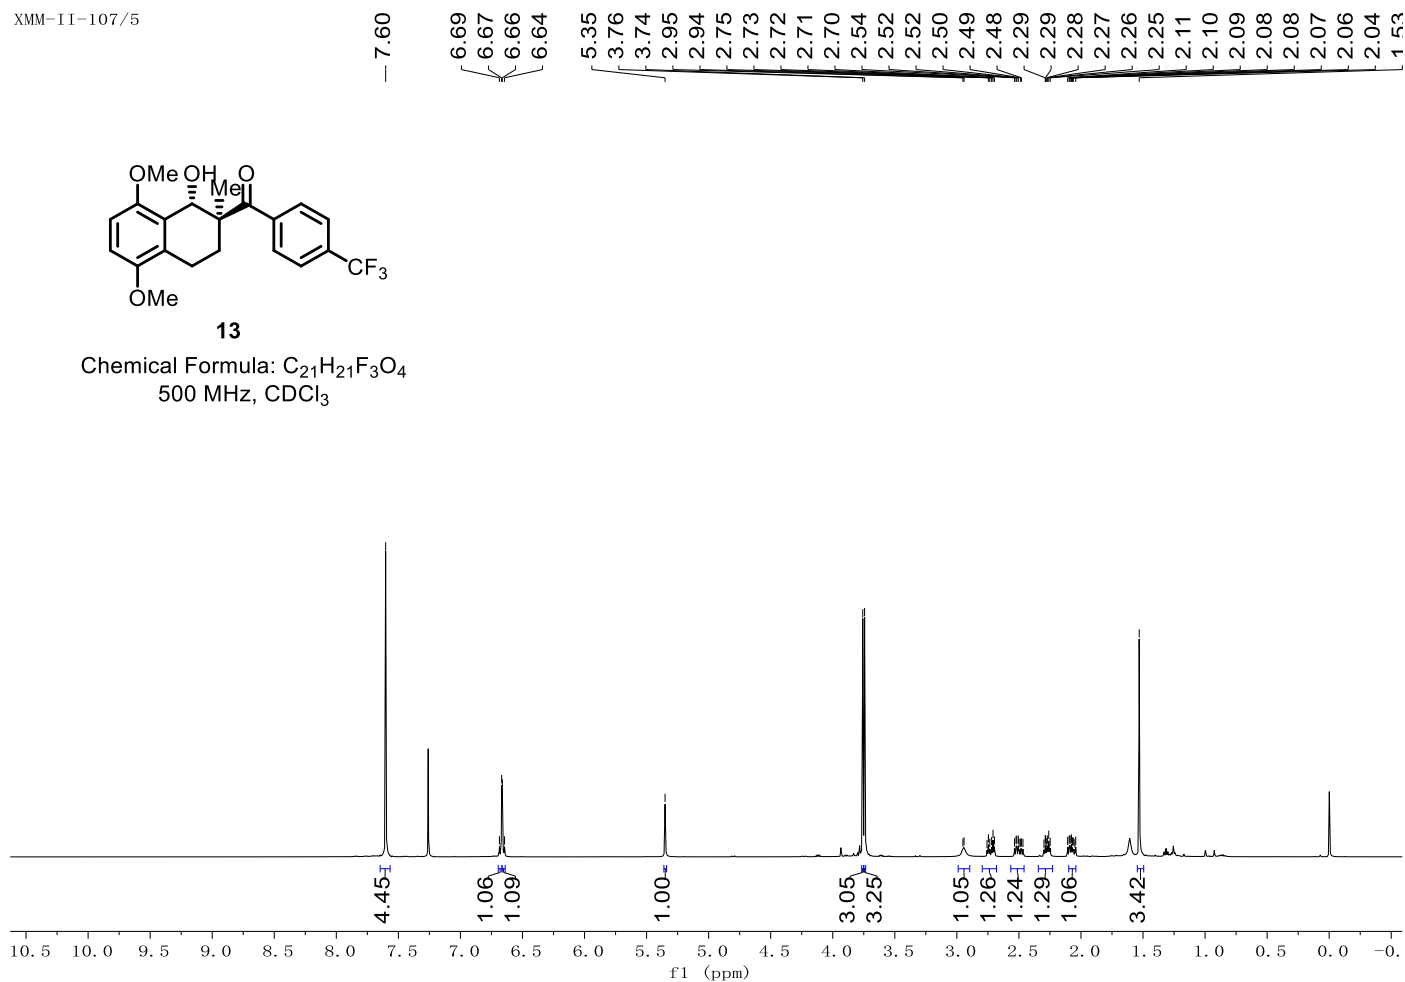

XMM-II-107/7

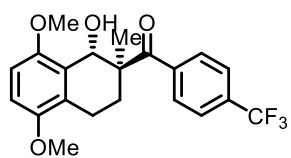**13**

Chemical Formula:  $C_{21}H_{21}F_3O_4$   
125 MHz,  $CDCl_3$

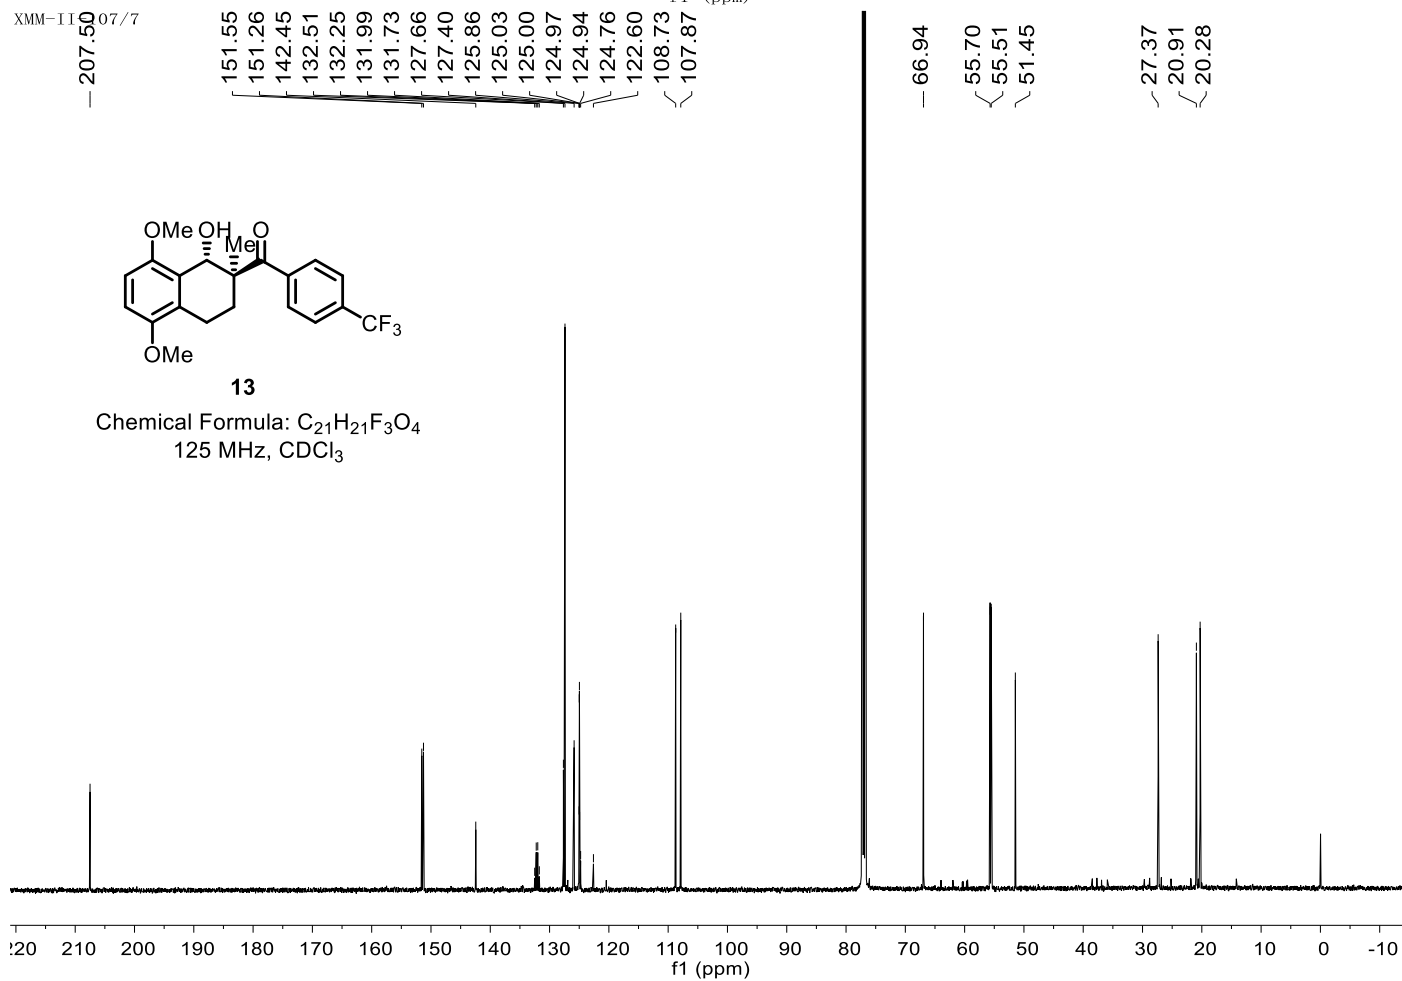

7.76  
7.74  
7.73  
7.69  
7.67  
7.58  
7.49  
7.47  
6.70  
6.67  
6.67  
6.65  
5.36  
3.77  
3.74  
2.84  
2.78  
2.77  
2.77  
2.76  
2.75  
2.73  
2.72  
2.72  
2.71  
2.54  
2.53  
2.52  
2.50  
2.48  
2.47  
2.46  
2.33  
2.32  
2.32  
2.32  
2.31  
2.30  
2.30  
2.29  
2.29  
2.28  
2.27  
2.14  
2.12  
2.11  
2.10  
2.10  
2.09  
2.08  
1.55

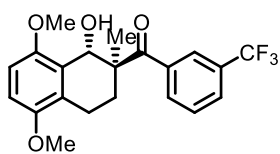

**14**

Chemical Formula:  $C_{21}H_{21}F_3O_4$   
400 MHz,  $CDCl_3$

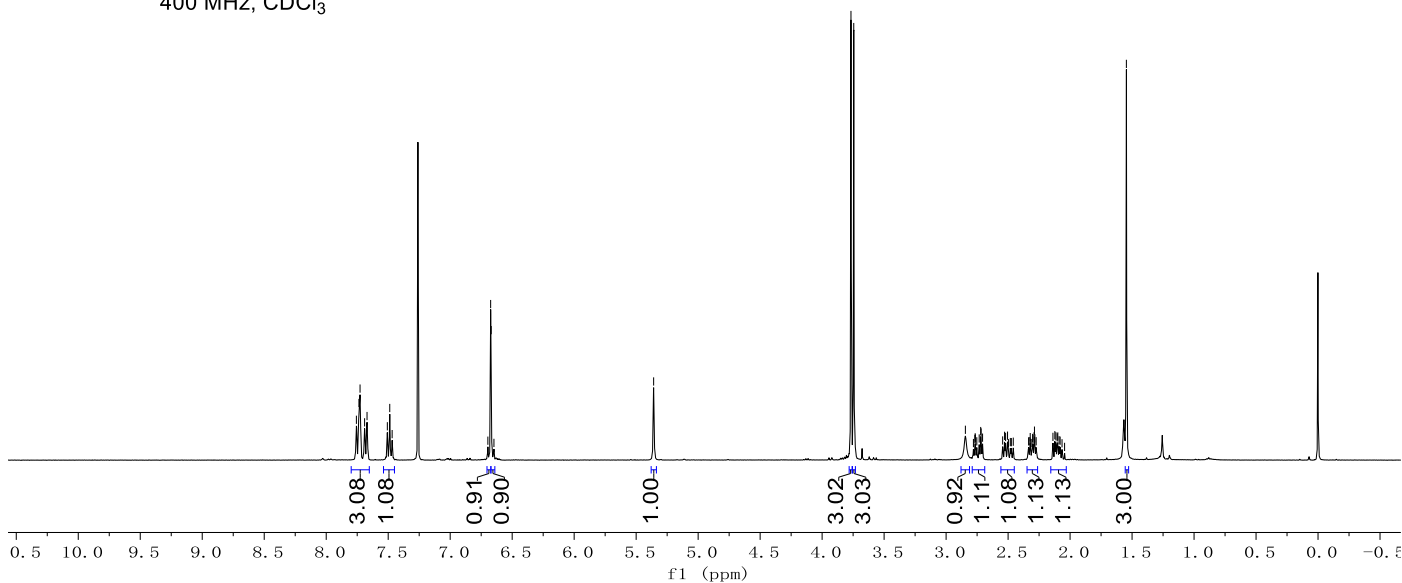

XMM-117 500/5

206.75

151.47  
151.27

139.64

130.46

128.59

127.66

127.15

125.87

124.12

108.80

107.83

66.84

55.67

55.51

51.46

27.30

20.97

20.60

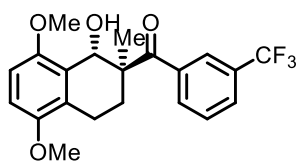

**14**

Chemical Formula:  $C_{21}H_{21}F_3O_4$   
125 MHz,  $CDCl_3$

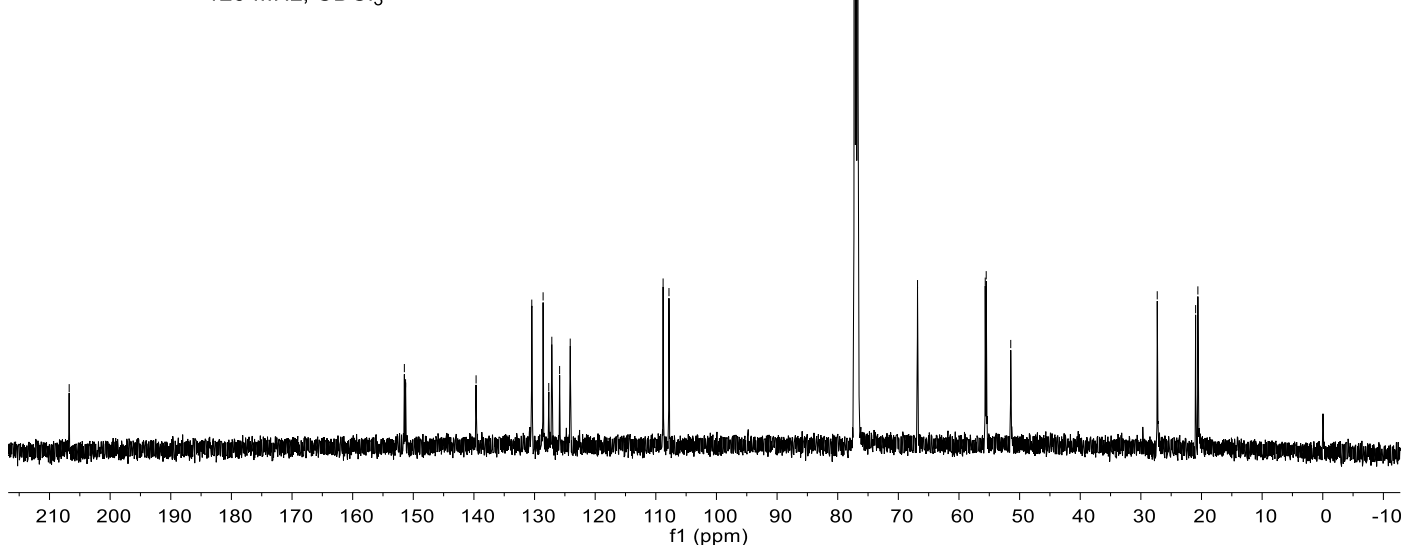

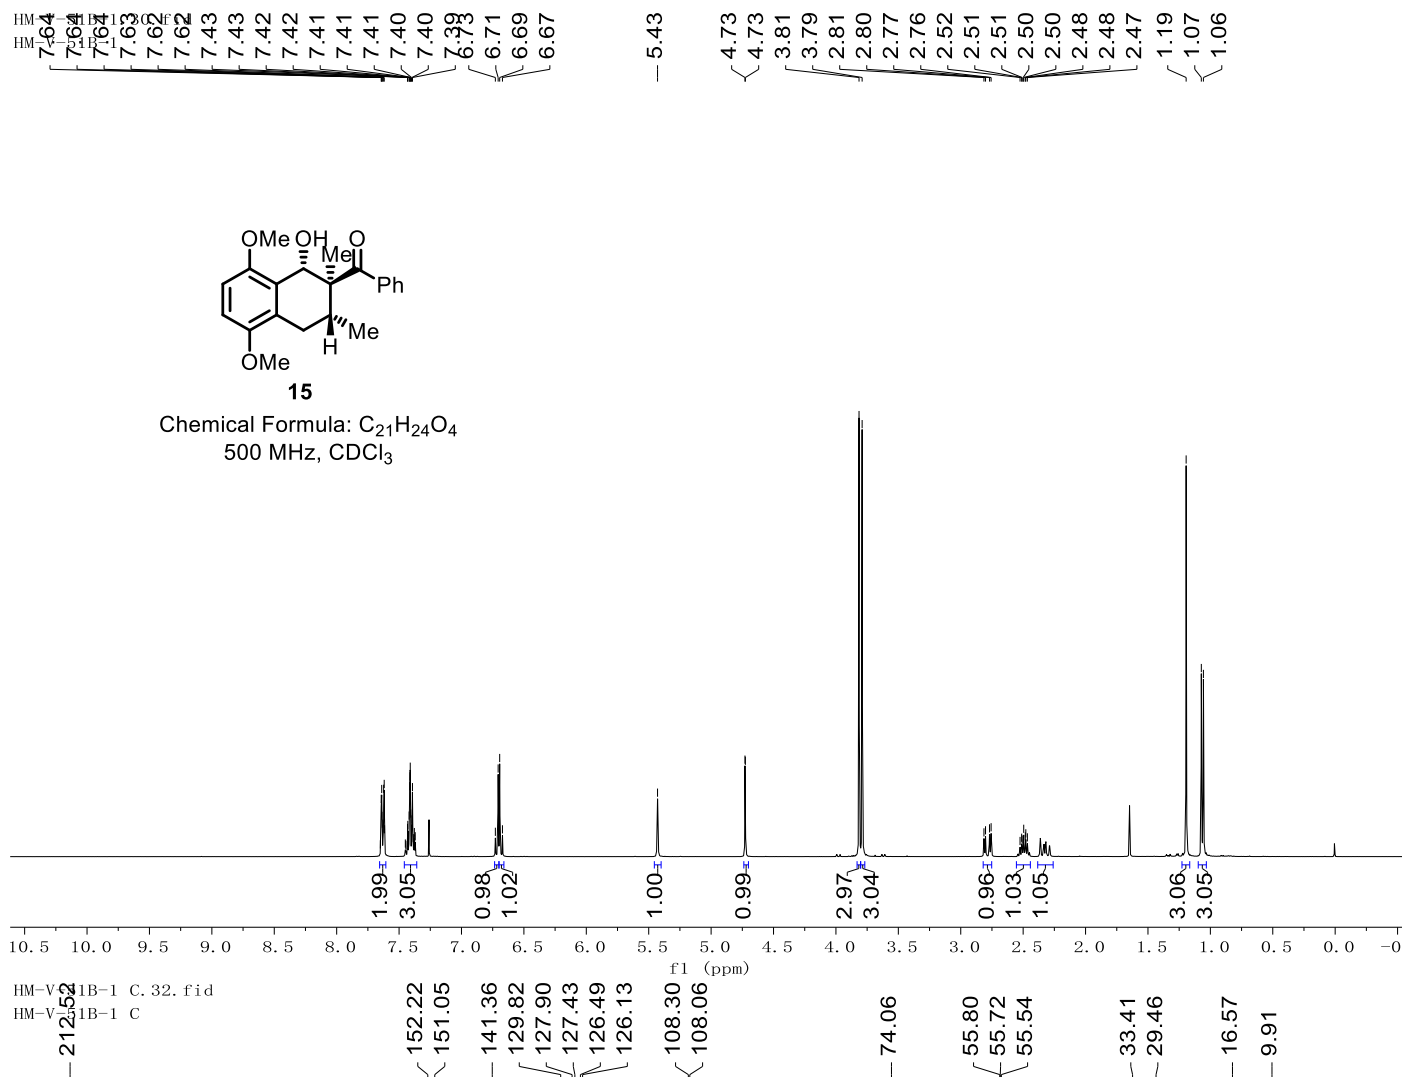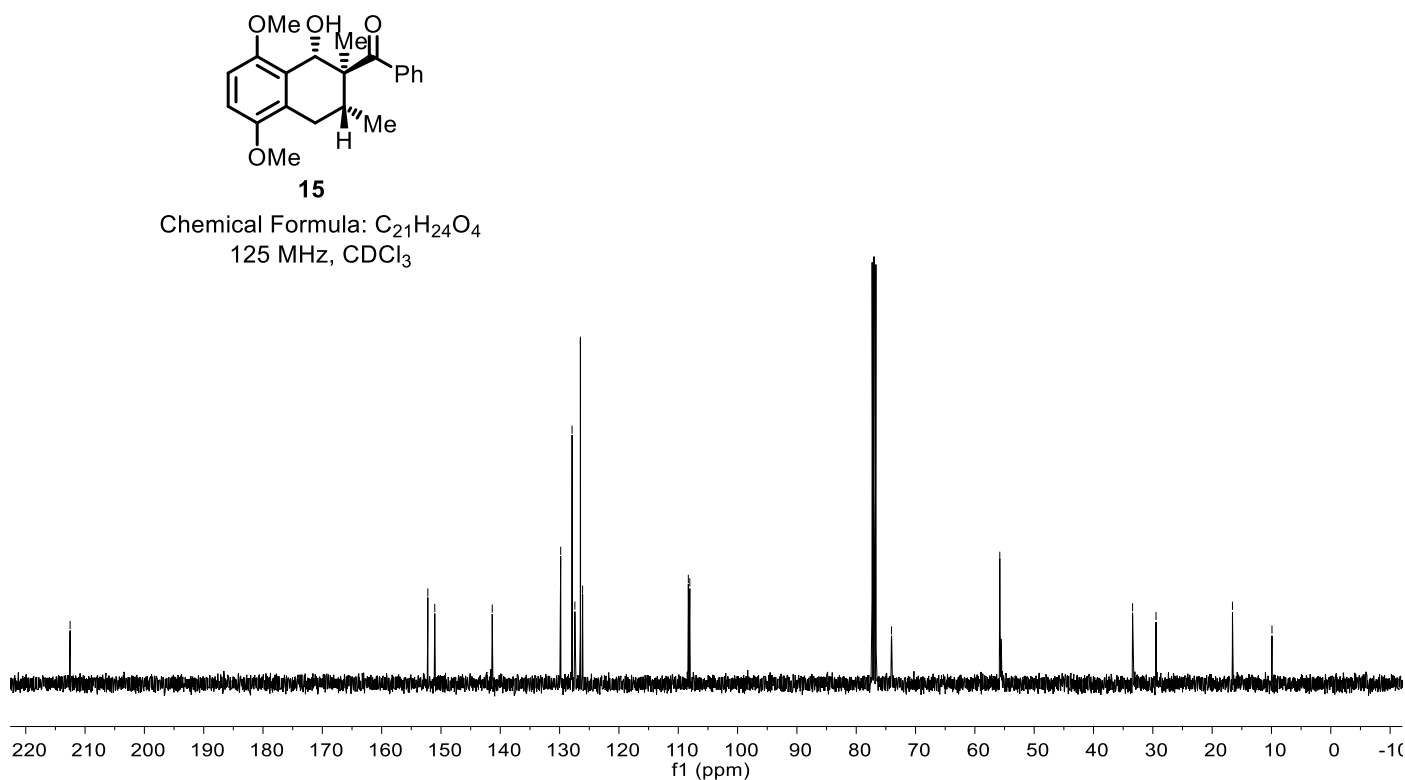

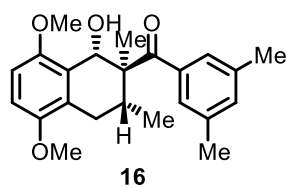

Chemical Formula:  $C_{23}H_{28}O_4$   
500 MHz,  $CDCl_3$

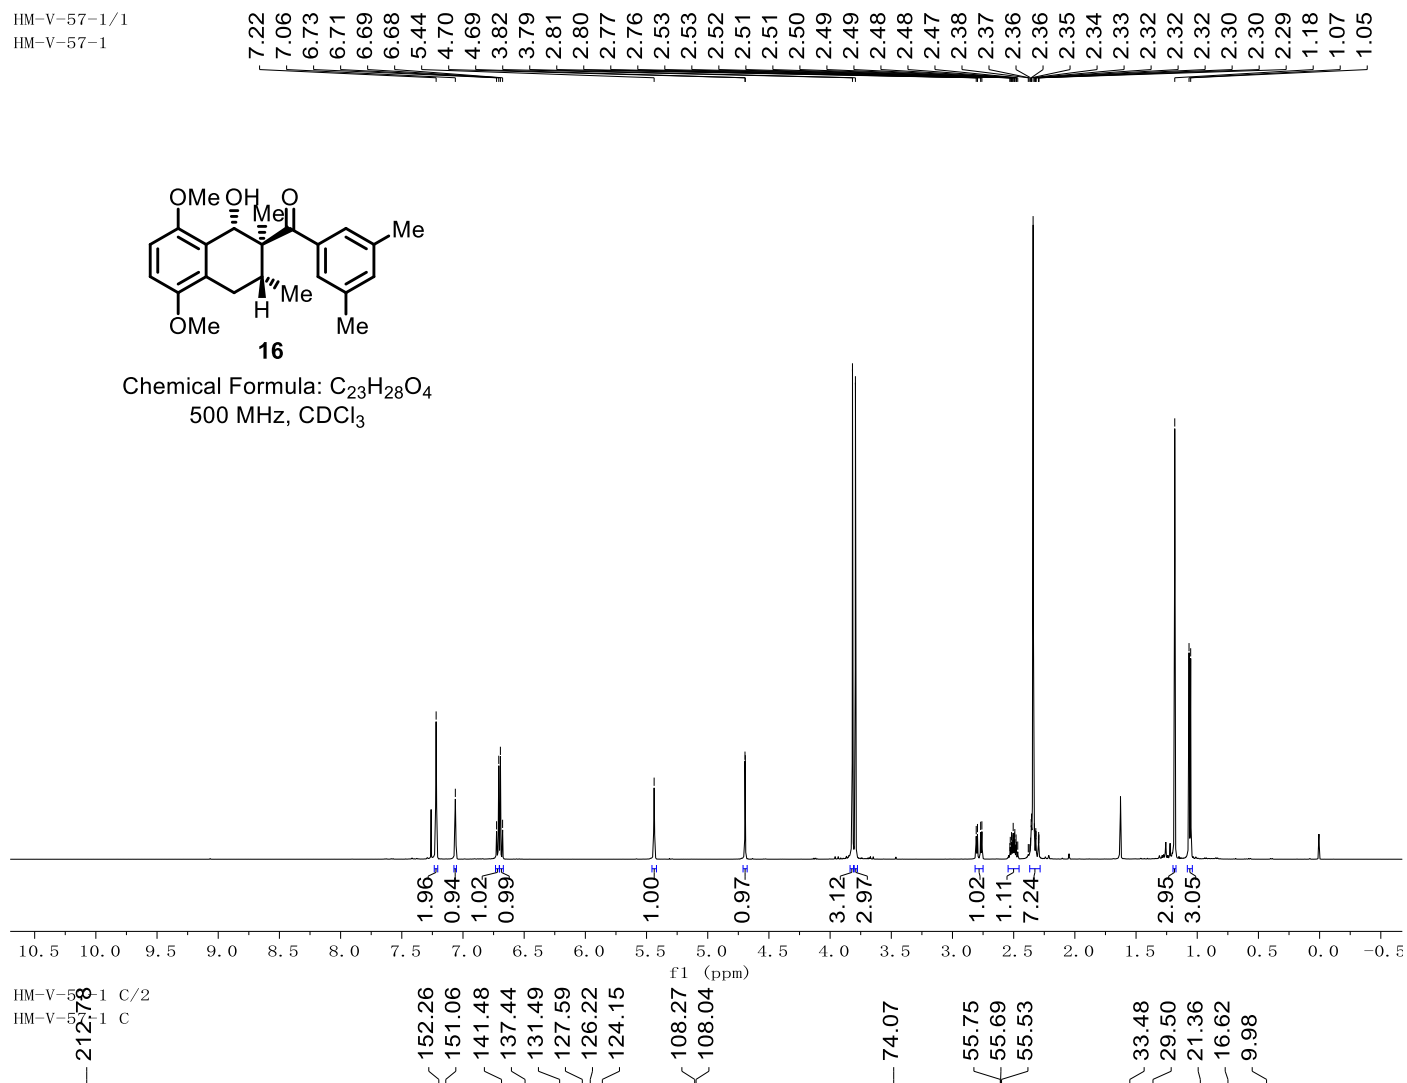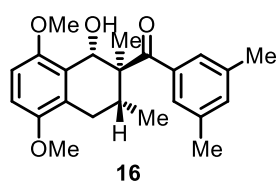

Chemical Formula:  $C_{23}H_{28}O_4$   
125 MHz,  $CDCl_3$

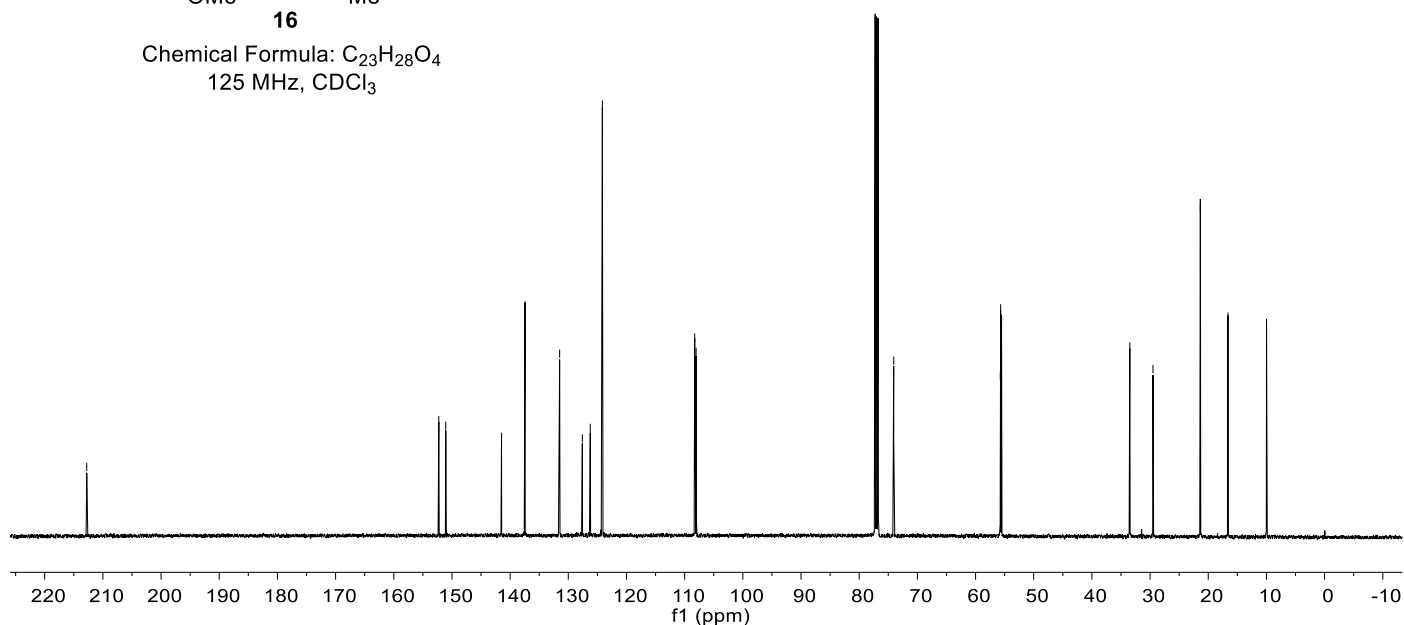

8.30  
7.95

6.77  
6.75  
6.74  
6.71

5.07  
5.06

3.84  
3.81  
3.03  
3.01  
2.98  
2.96  
2.86  
2.84  
2.83  
2.81  
2.80  
2.76  
2.75  
2.22  
2.19  
2.17  
2.14  
1.10  
0.90  
0.88

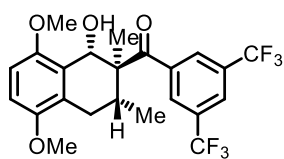

Chemical Formula:  $C_{23}H_{22}F_6O_4$   
400 MHz,  $CDCl_3$

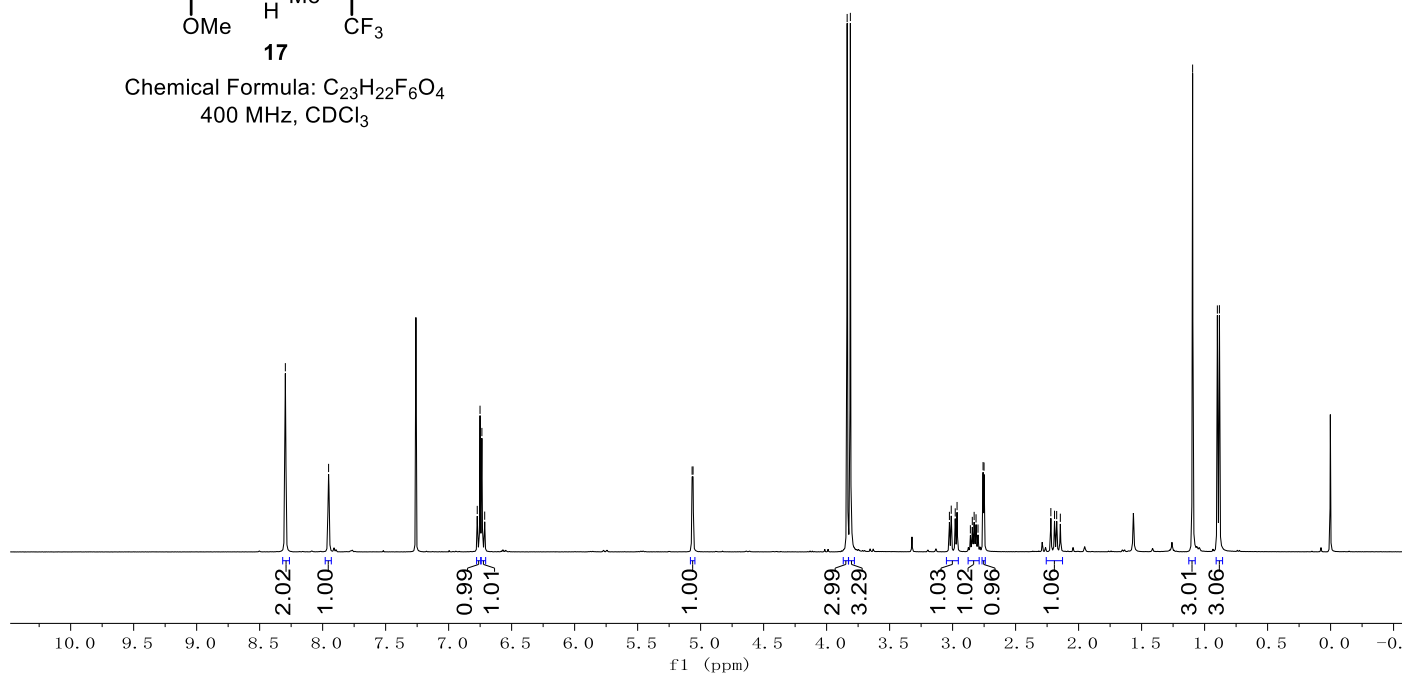

xmm-II-110-C 400.12.fid

206.70

151.72  
150.87  
143.02  
131.89  
131.55  
131.22  
130.89  
128.01  
125.98  
125.56  
124.49  
123.57  
121.78  
109.14  
107.52

70.38  
70.36  
55.63  
55.59  
54.55

29.57  
26.90  
16.89  
14.11

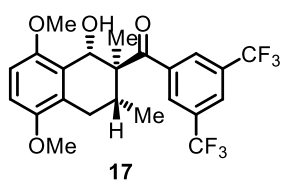

Chemical Formula:  $C_{23}H_{22}F_6O_4$   
100 MHz,  $CDCl_3$

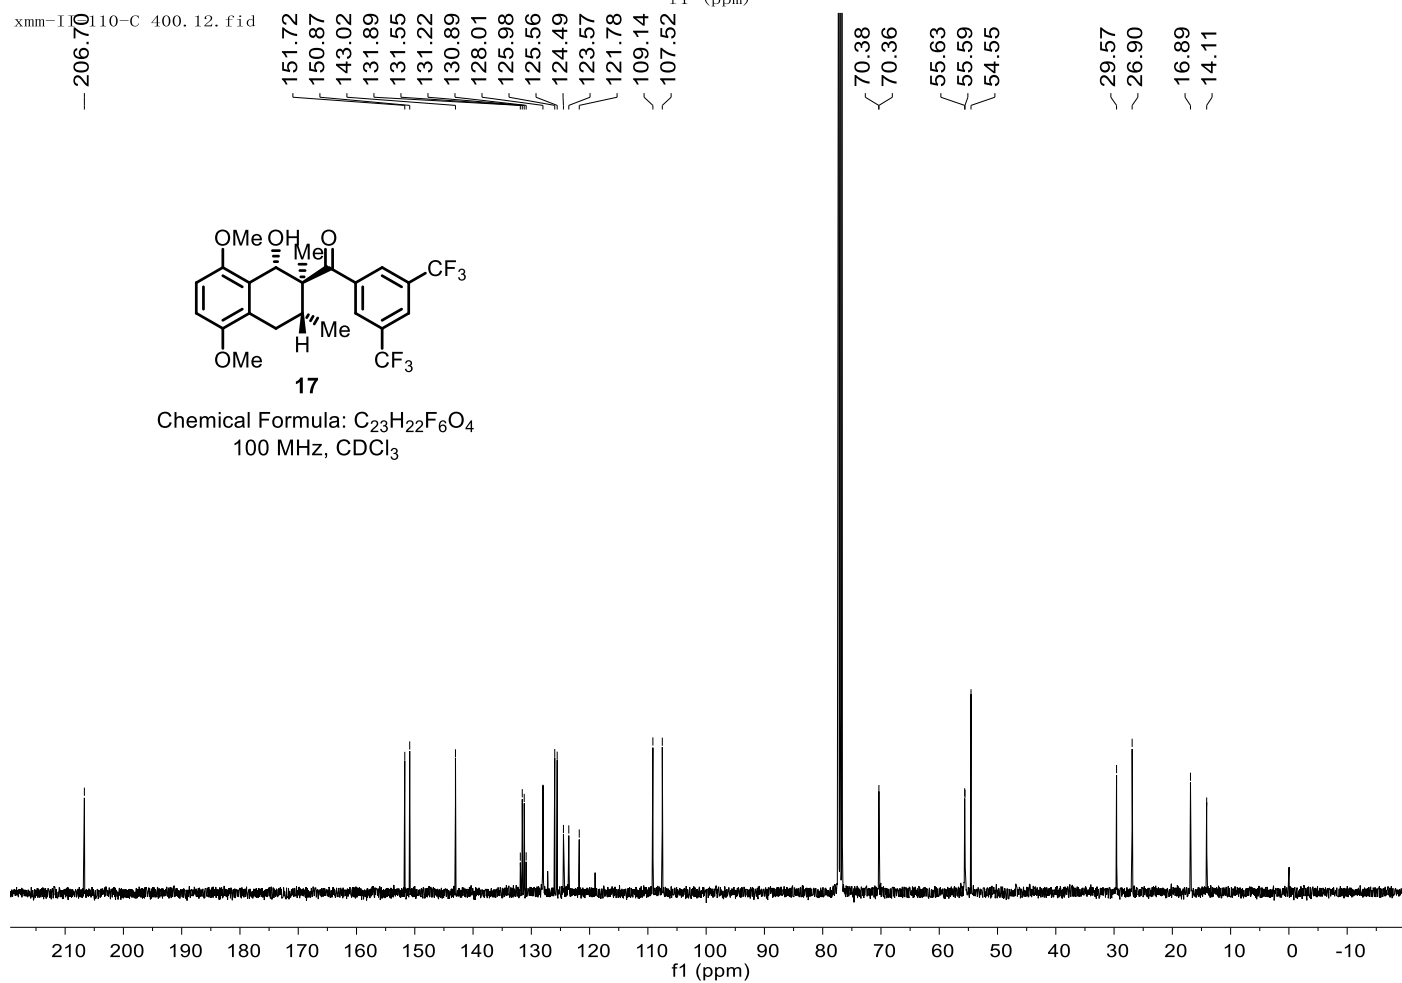



XMM-II-115-HC 400.10.fid

7.72  
7.70  
7.67  
7.65  
6.74  
6.72  
6.70  
6.68

5.34

4.83

3.83  
3.79  
2.83  
2.82  
2.78  
2.77  
2.50  
2.48  
2.47  
2.47  
2.45  
2.44  
2.44  
2.42  
2.42  
2.41  
2.35  
2.32  
2.31  
2.28

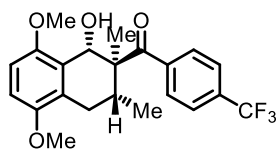

**18**

Chemical Formula: C<sub>22</sub>H<sub>23</sub>F<sub>3</sub>O<sub>4</sub>  
400 MHz, CDCl<sub>3</sub>

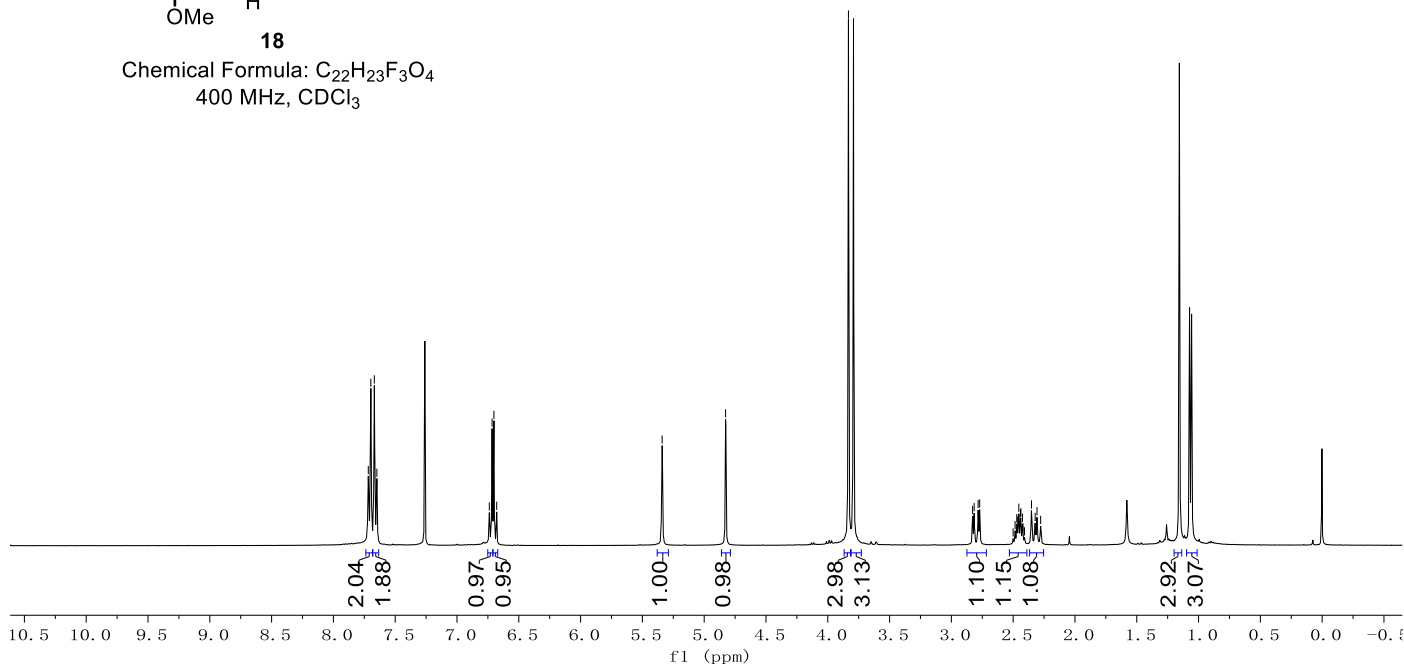

XMM-II-115-HC 400.11.fid

212.33

152.23  
151.15  
144.92  
131.63  
131.30  
127.10  
126.65  
126.00  
124.99  
124.96  
122.50  
108.50  
108.24

74.34

55.98  
55.82  
55.58

33.34  
29.46

16.60  
9.77

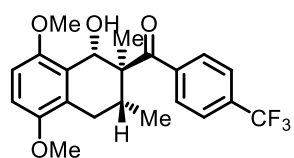

**18**

Chemical Formula: C<sub>22</sub>H<sub>23</sub>F<sub>3</sub>O<sub>4</sub>  
100 MHz, CDCl<sub>3</sub>

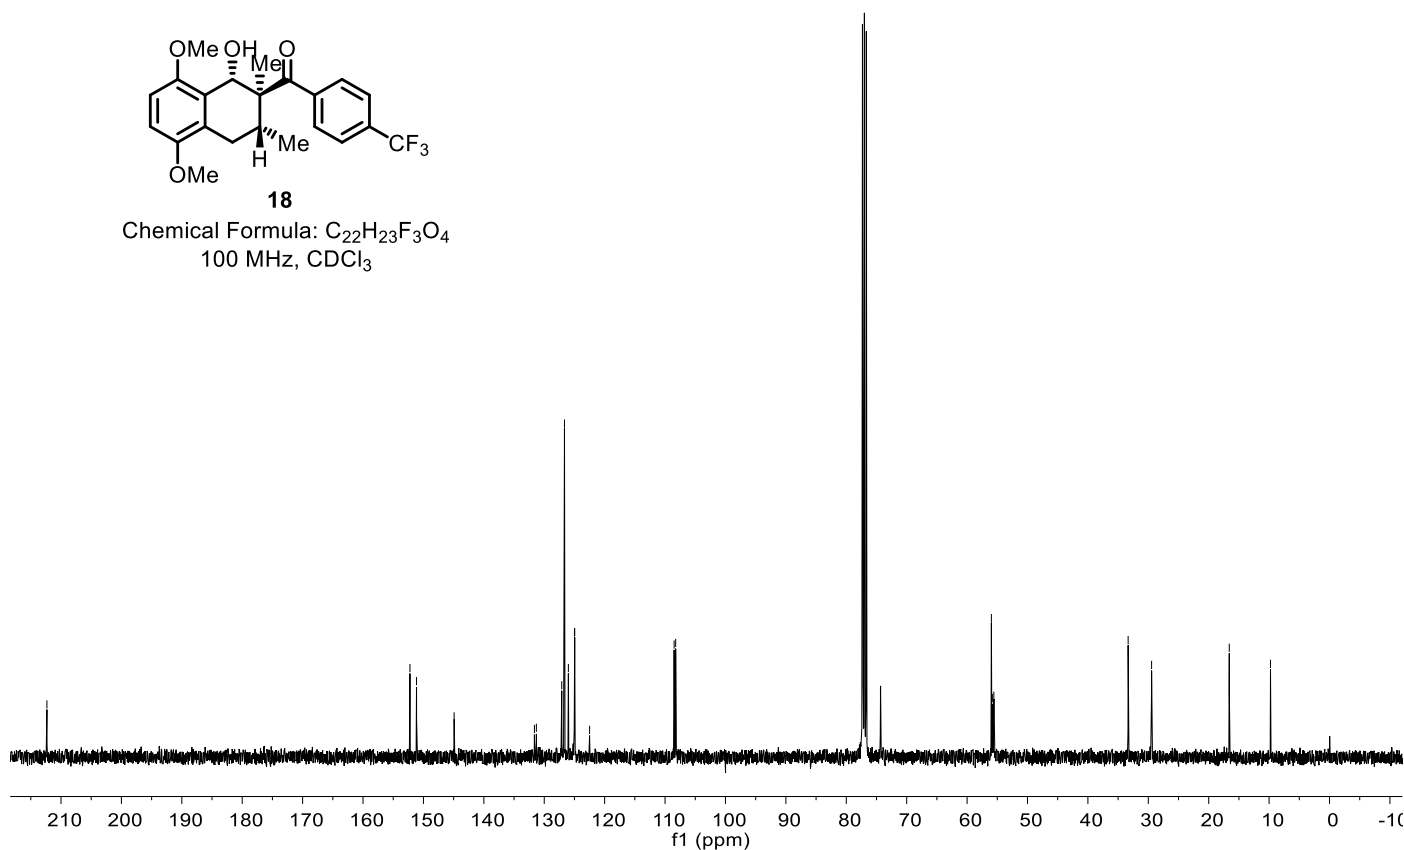

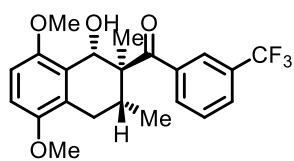**19**

Chemical Formula:  $C_{22}H_{23}F_3O_4$   
500 MHz,  $CDCl_3$

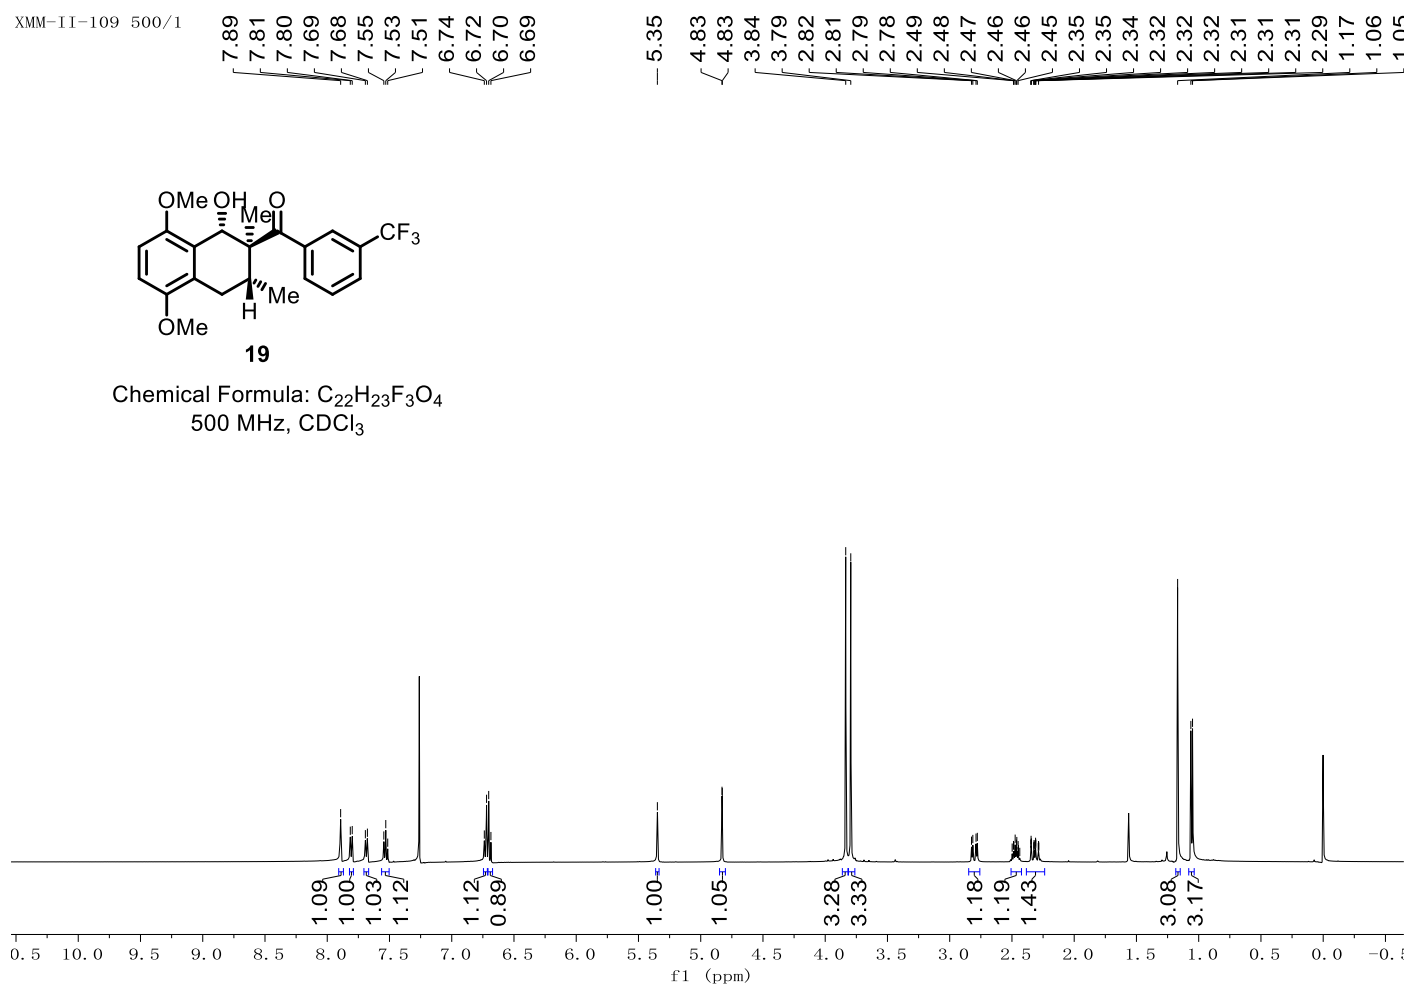

XMM-II-109

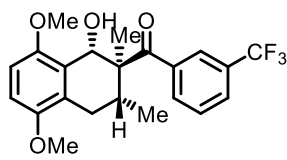**19**

Chemical Formula:  $C_{22}H_{23}F_3O_4$   
125 MHz,  $CDCl_3$

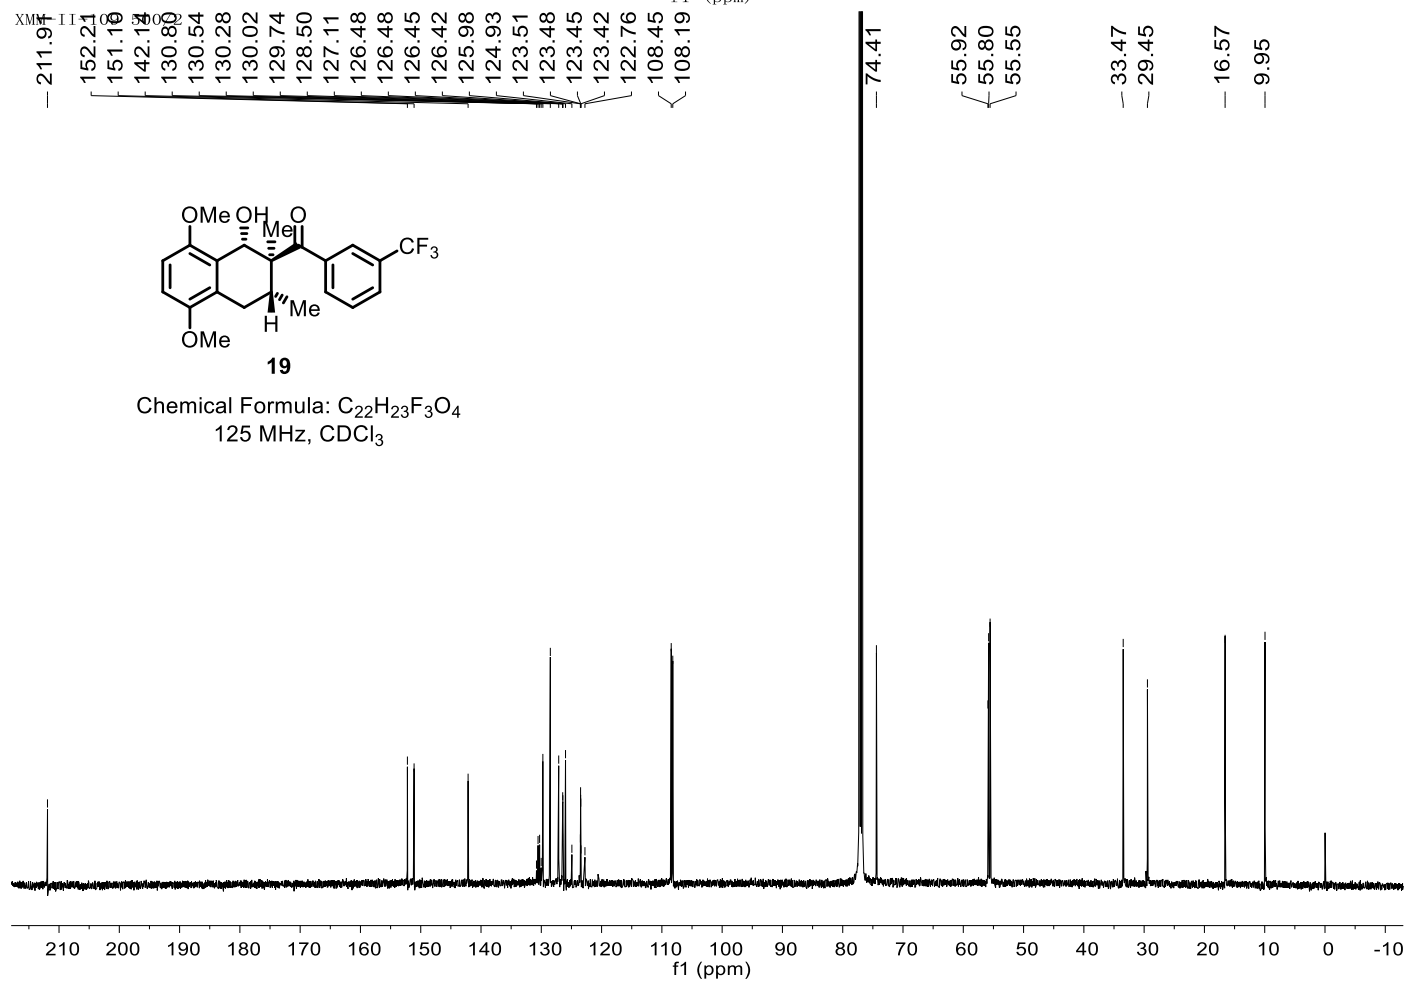

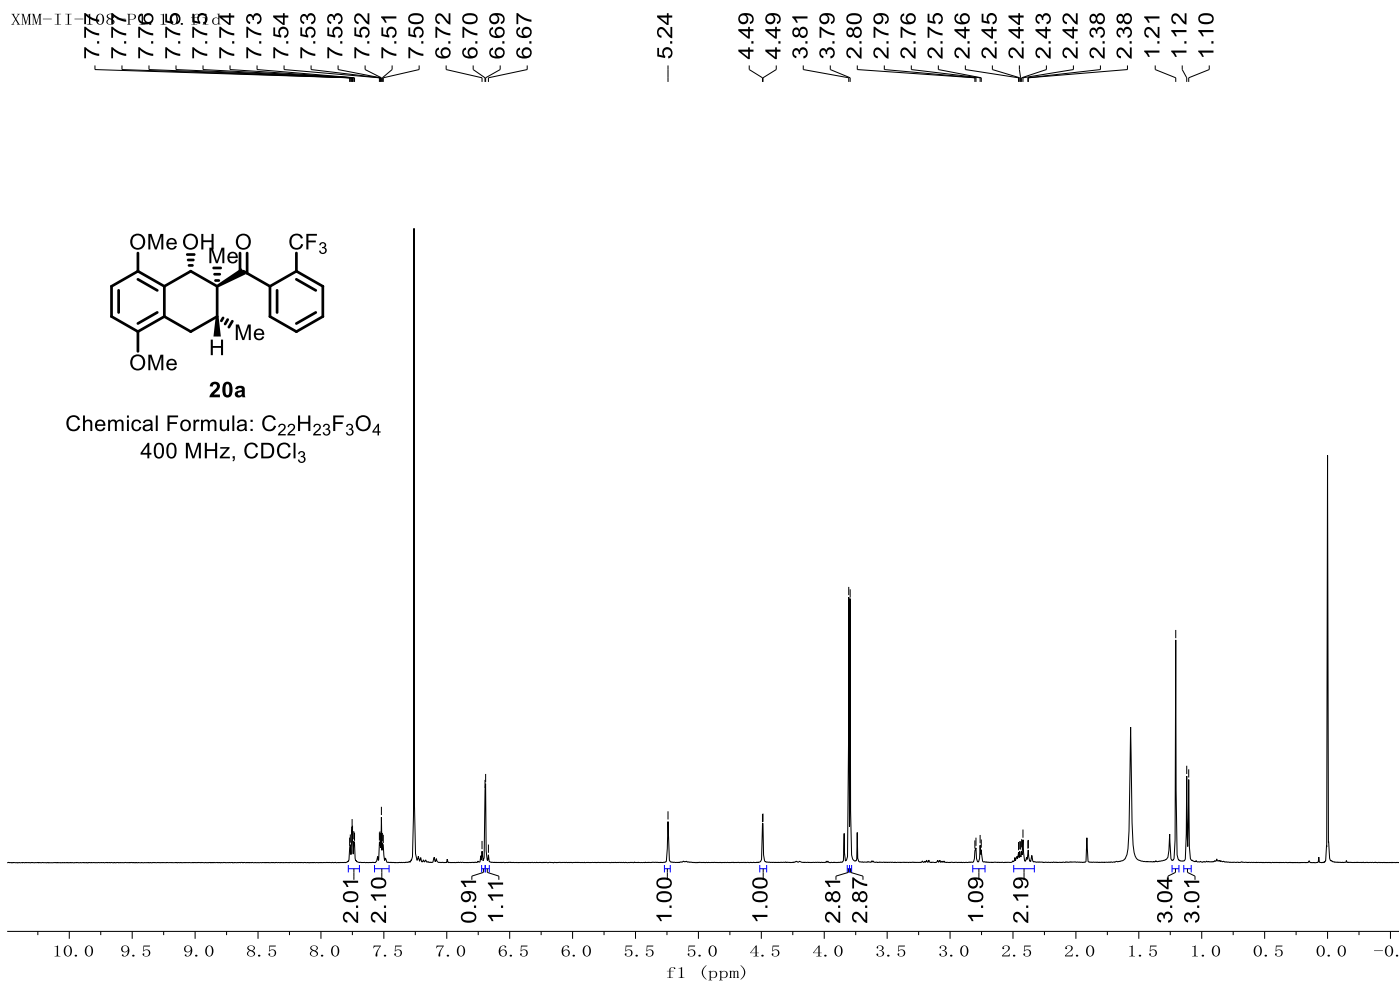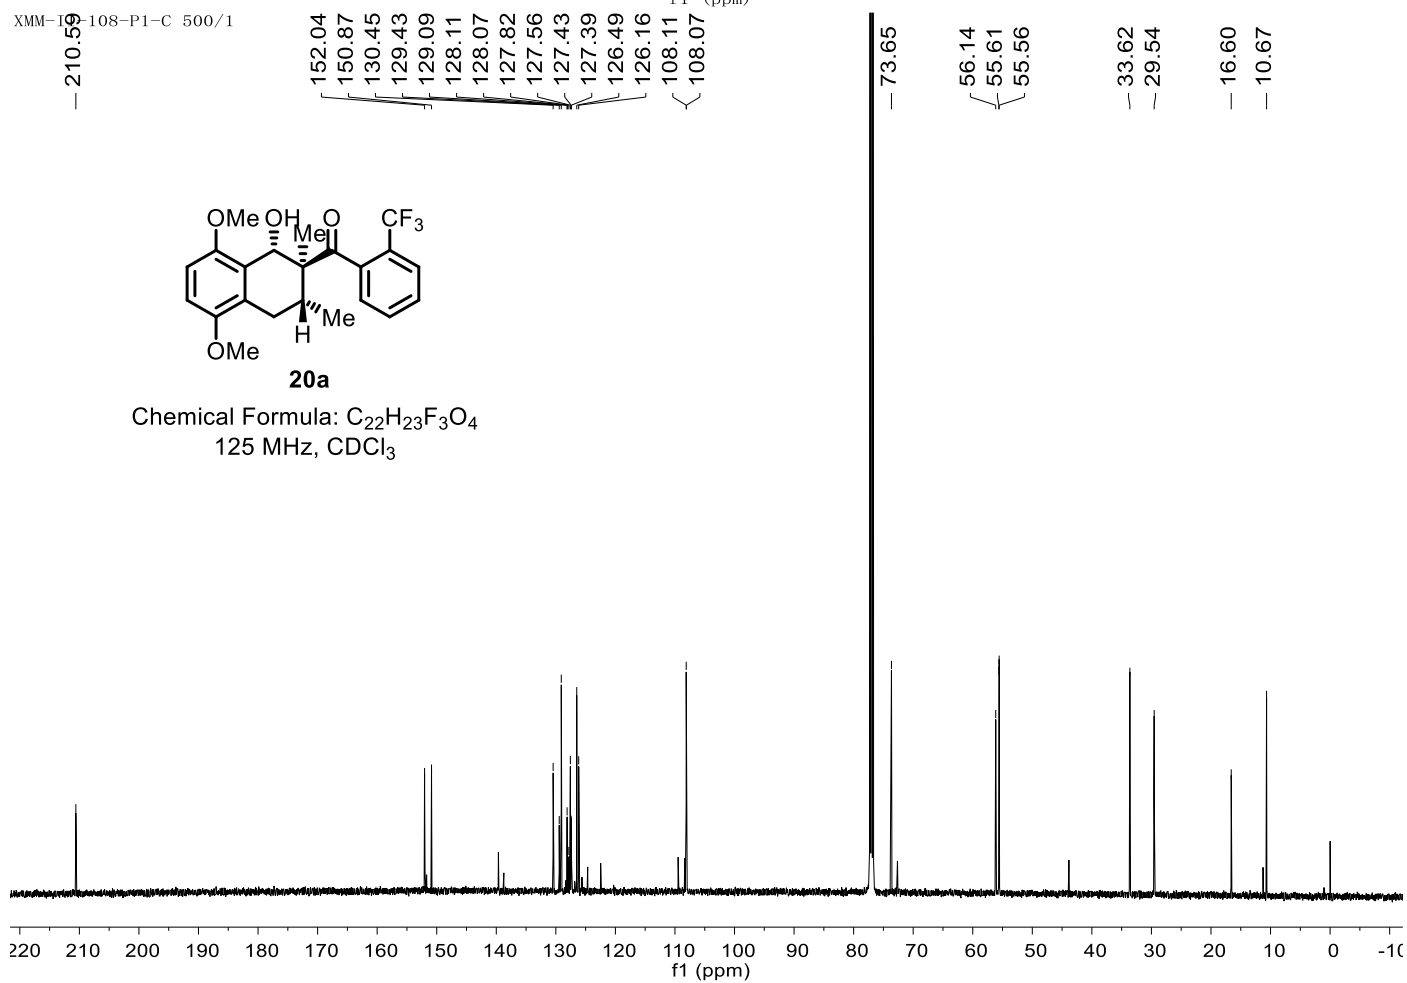

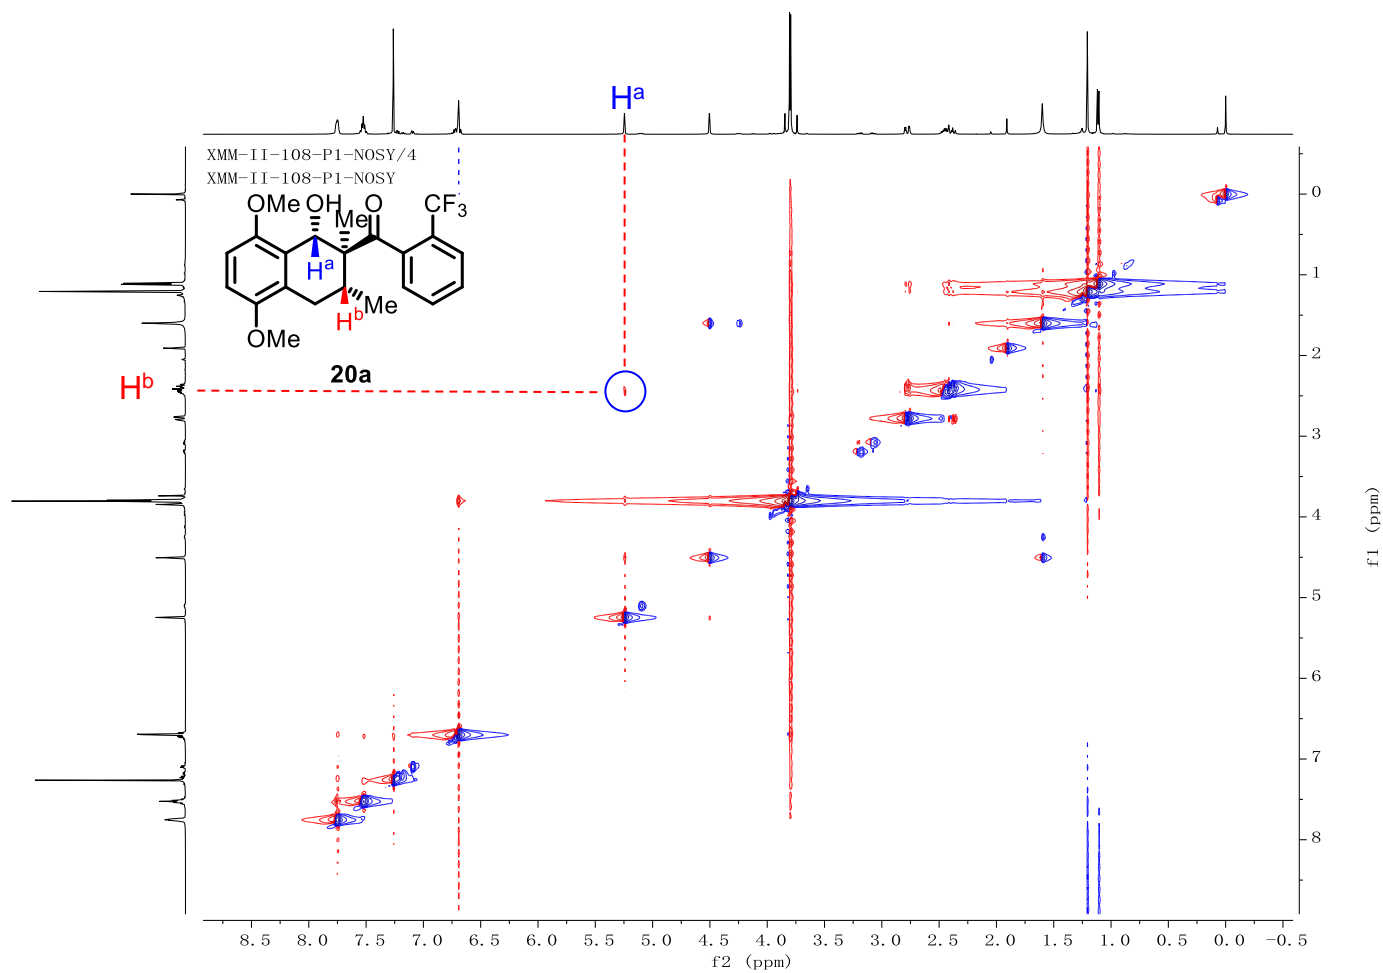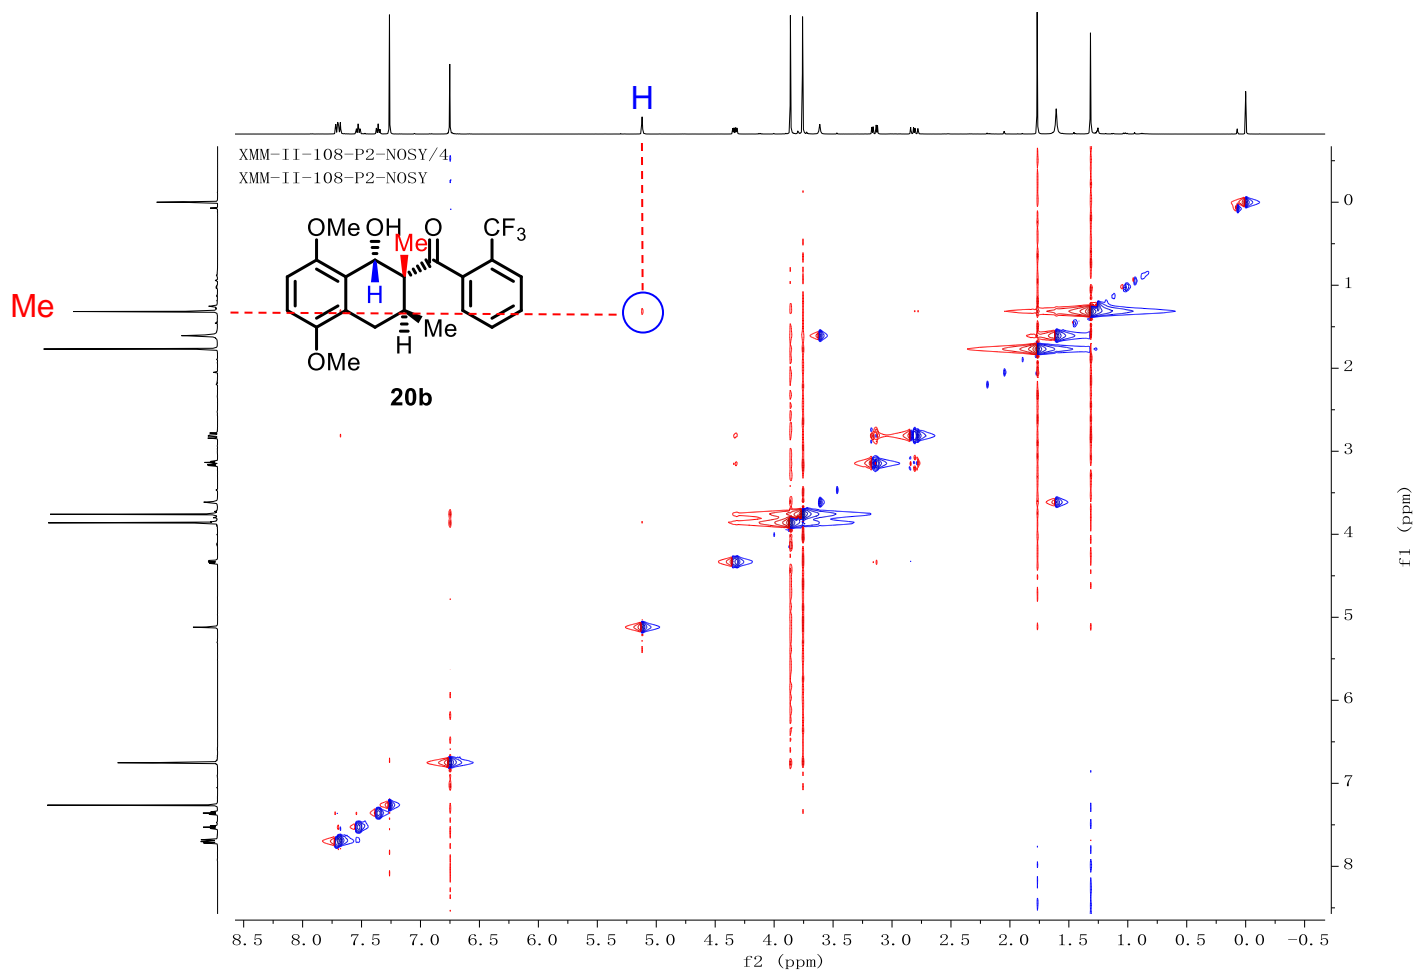

XMM-11-188-P2-C 500  
 7.72  
 7.72  
 7.72  
 7.70  
 7.69  
 7.67  
 7.54  
 7.52  
 7.52  
 7.50  
 7.37  
 7.35  
 7.34  
 6.75

5.12  
 5.11  
 4.36  
 4.35  
 4.33  
 4.32  
 3.86  
 3.76  
 3.55  
 3.18  
 3.17  
 3.13  
 3.12  
 2.84  
 2.81  
 2.80  
 2.77  
 1.78  
 1.32

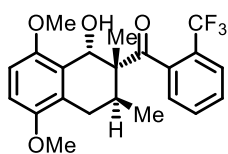

**20b**

Chemical Formula:  $C_{22}H_{23}F_3O_4$   
 400 MHz,  $CDCl_3$

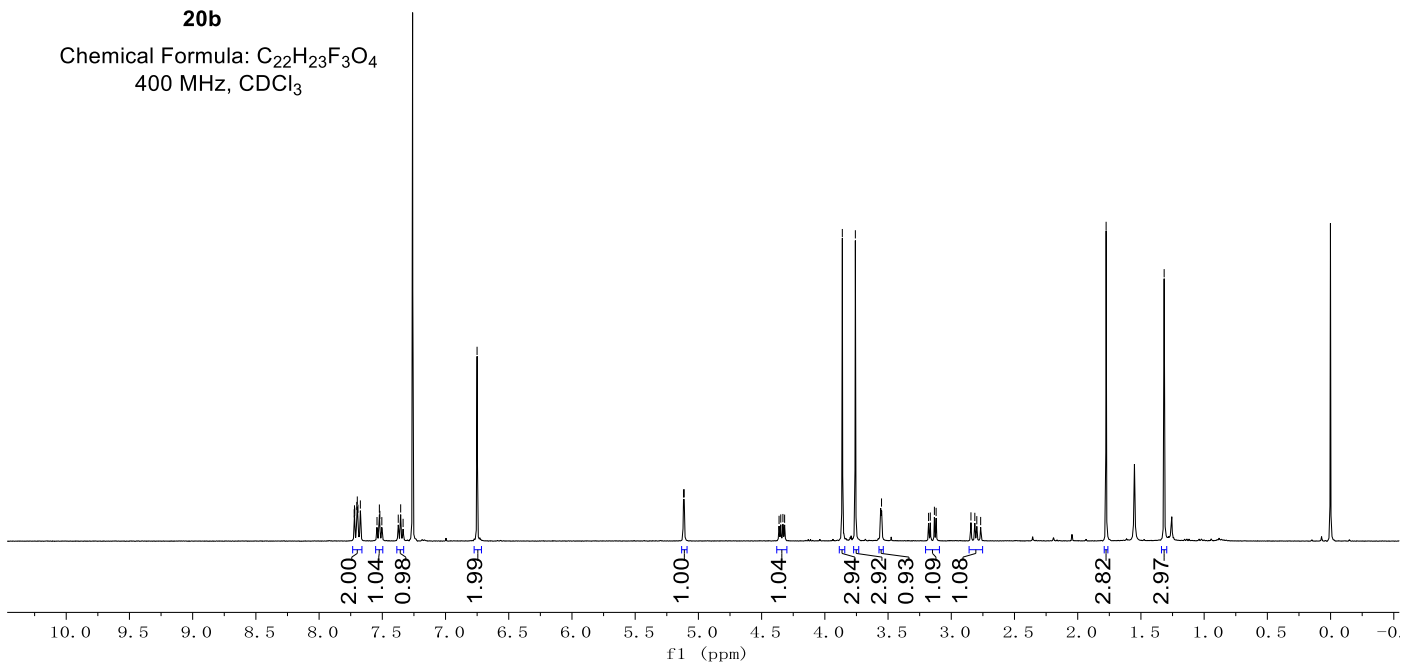

XMM-11-108-P2-C 500  
 213.12  
 151.99  
 150.69  
 143.39  
 131.64  
 129.68  
 129.45  
 129.22  
 128.99  
 128.78  
 126.63  
 126.58  
 126.53  
 126.49  
 126.23  
 125.54  
 125.48  
 123.30  
 109.11  
 108.27  
 70.33  
 55.97  
 55.53  
 54.80  
 33.57  
 33.56  
 30.51  
 27.48  
 16.34

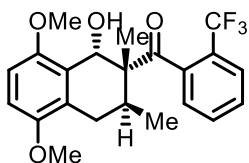

**20b**

Chemical Formula:  $C_{22}H_{23}F_3O_4$   
 125 MHz,  $CDCl_3$

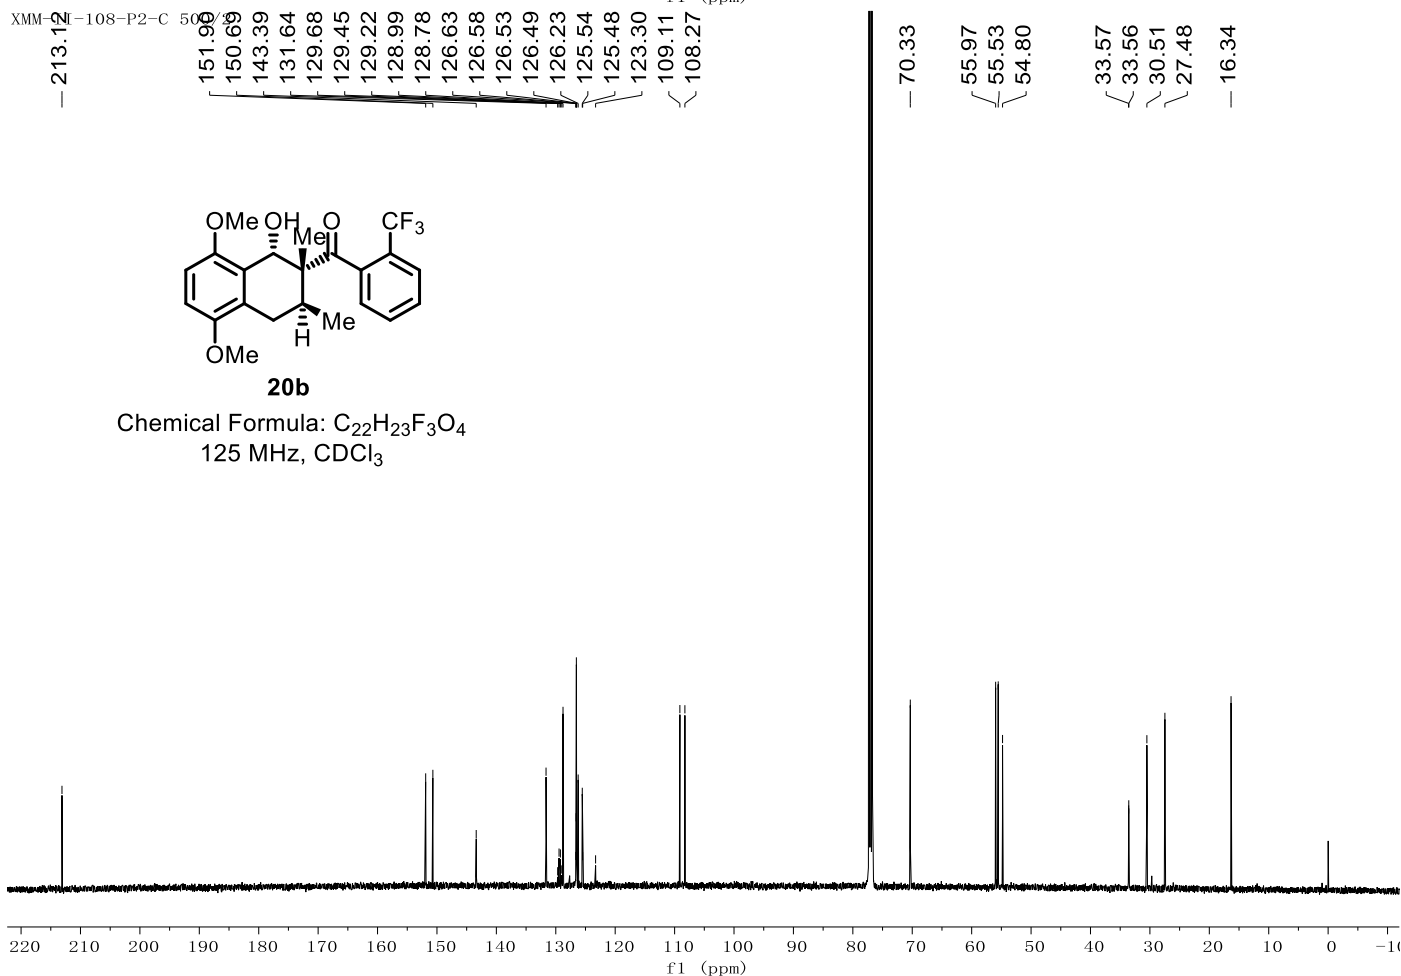

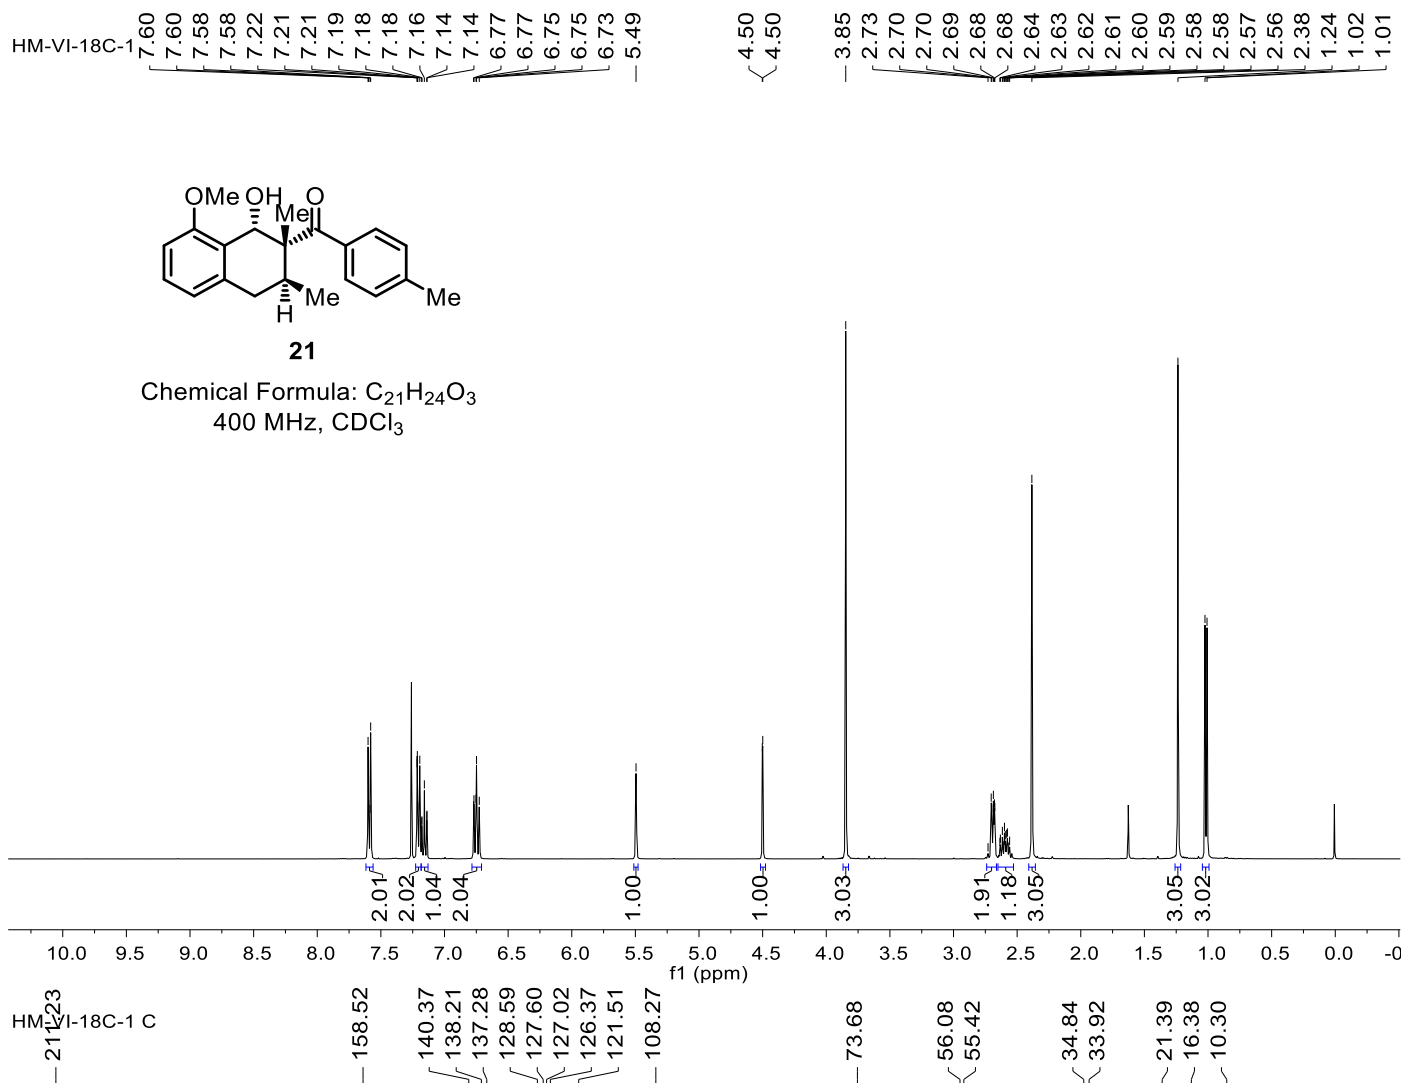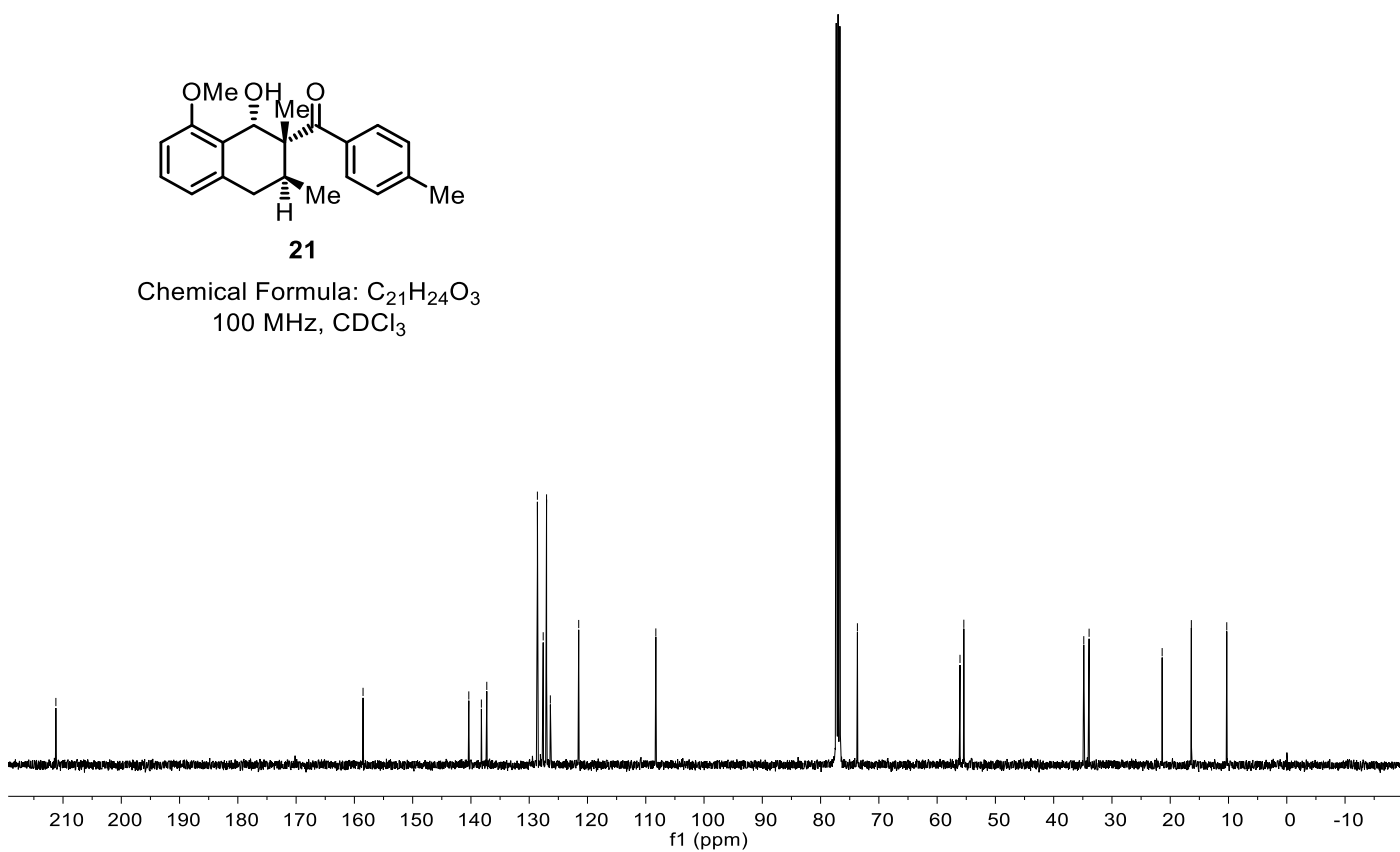

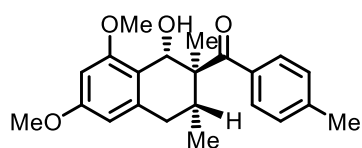**22**

Chemical Formula:  $C_{22}H_{26}O_4$   
500 MHz,  $CDCl_3$

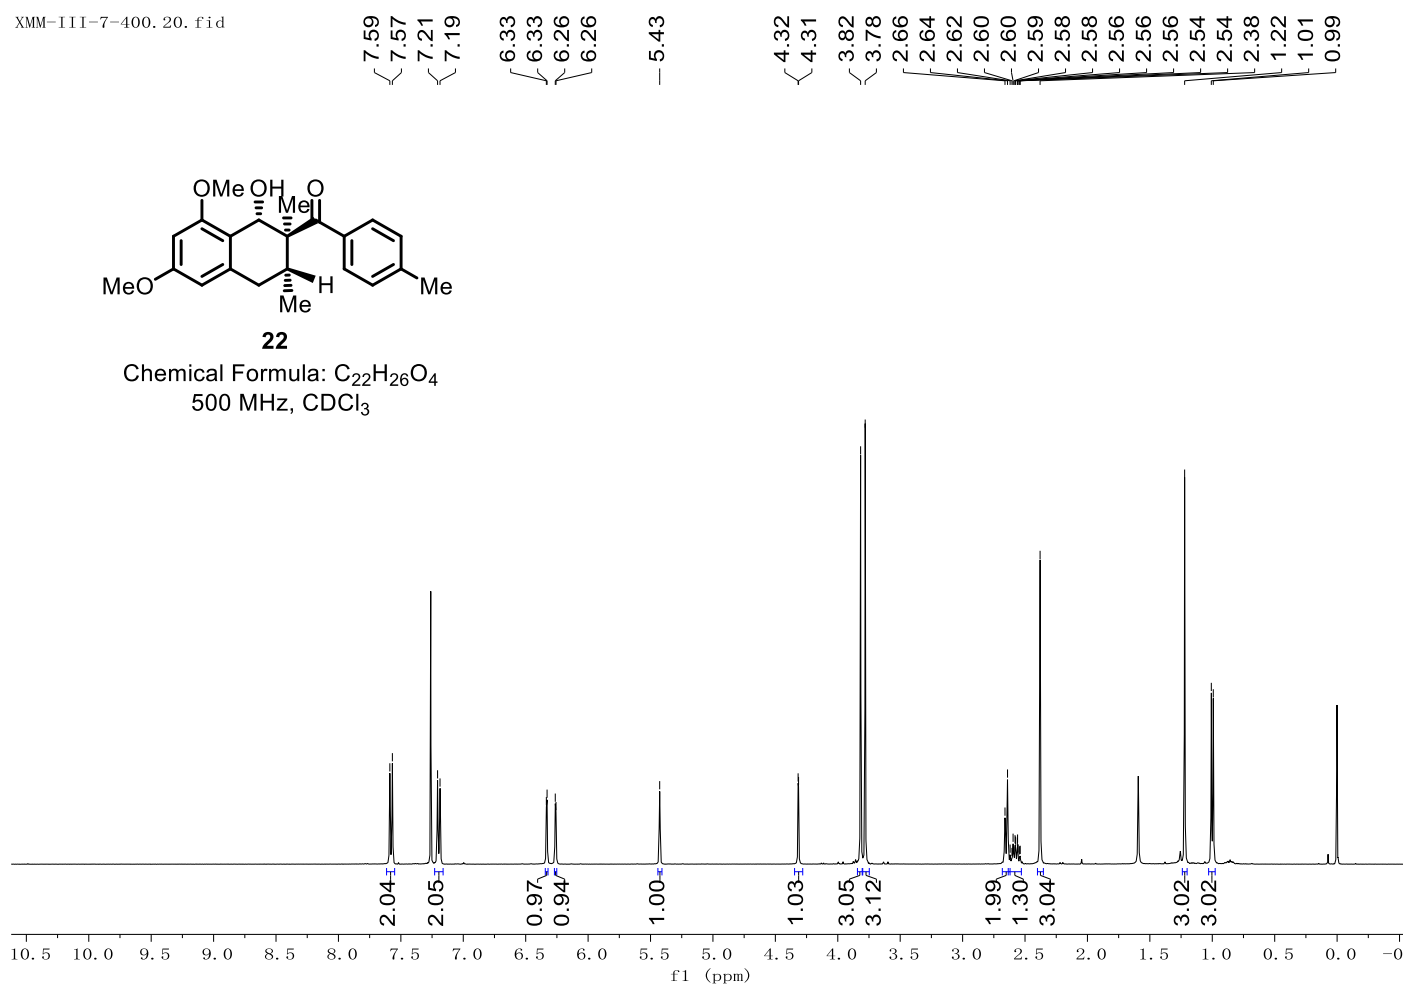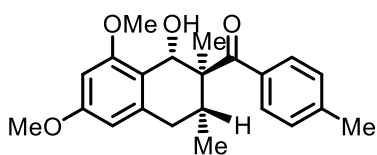**22**

Chemical Formula:  $C_{22}H_{26}O_4$   
125 MHz,  $CDCl_3$

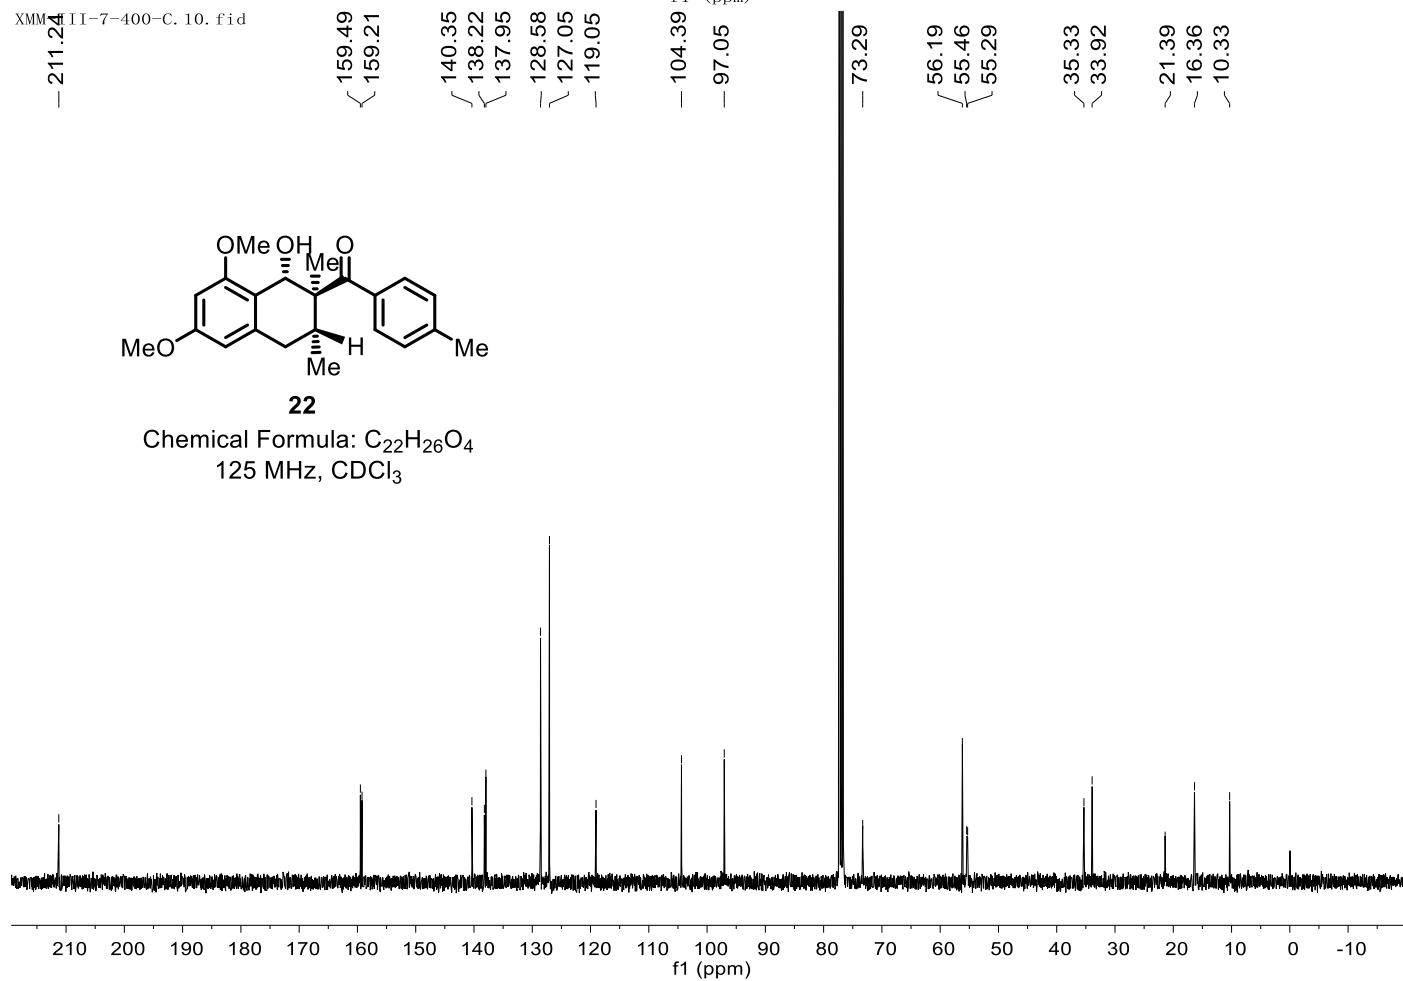

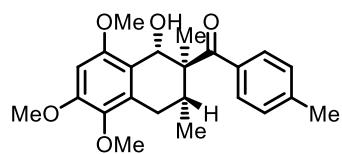**23**

Chemical Formula: C<sub>23</sub>H<sub>28</sub>O<sub>5</sub>  
400 MHz, CDCl<sub>3</sub>

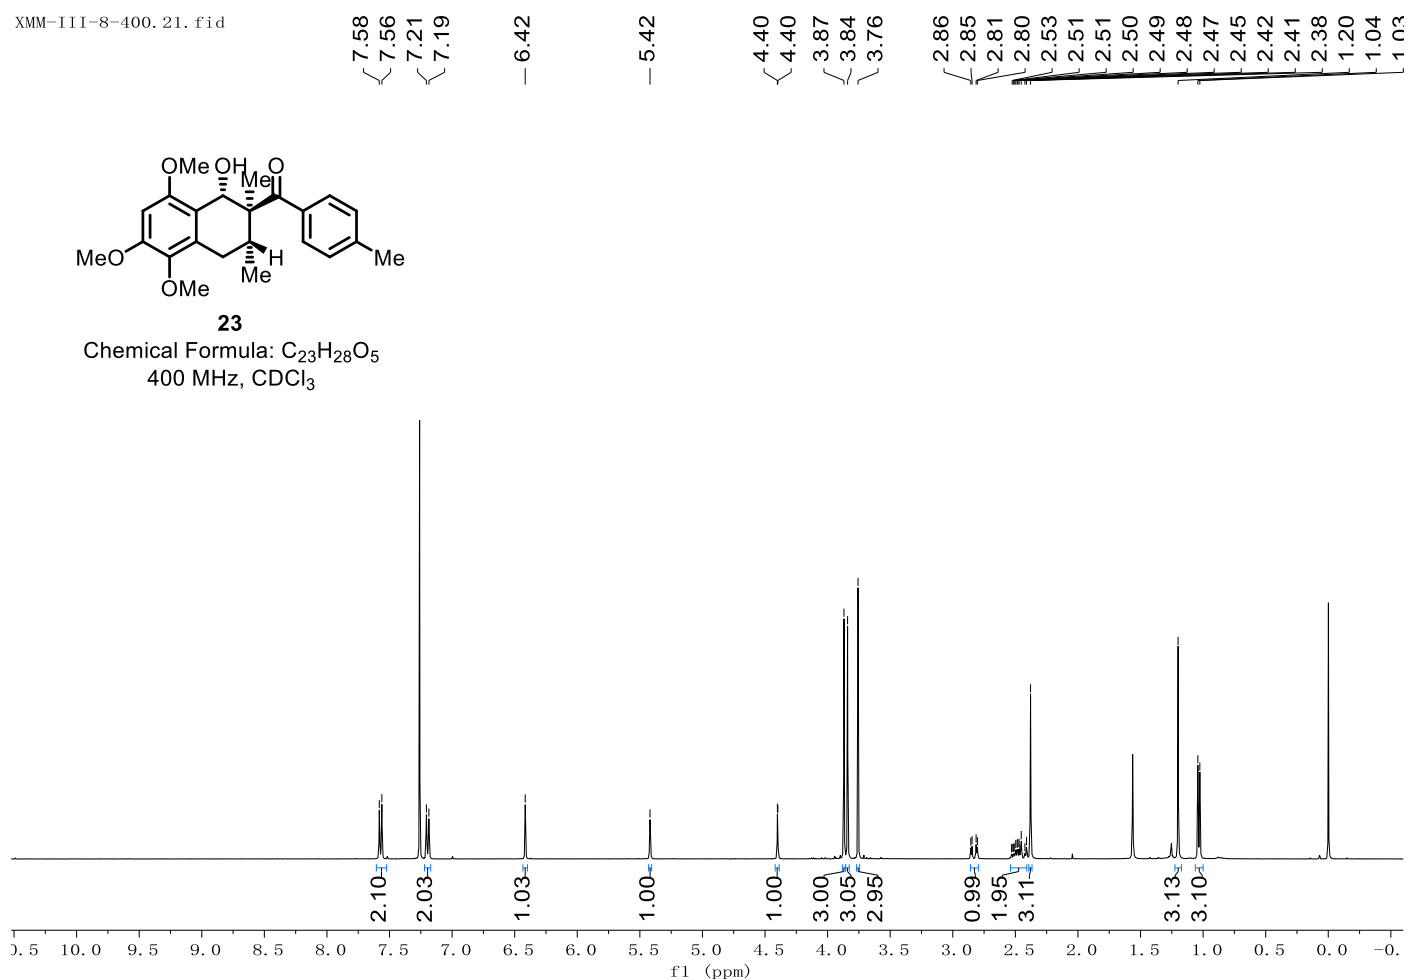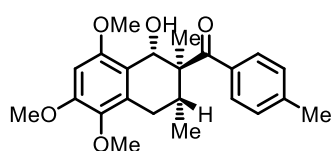**23**

Chemical Formula: C<sub>23</sub>H<sub>28</sub>O<sub>5</sub>  
100 MHz, CDCl<sub>3</sub>

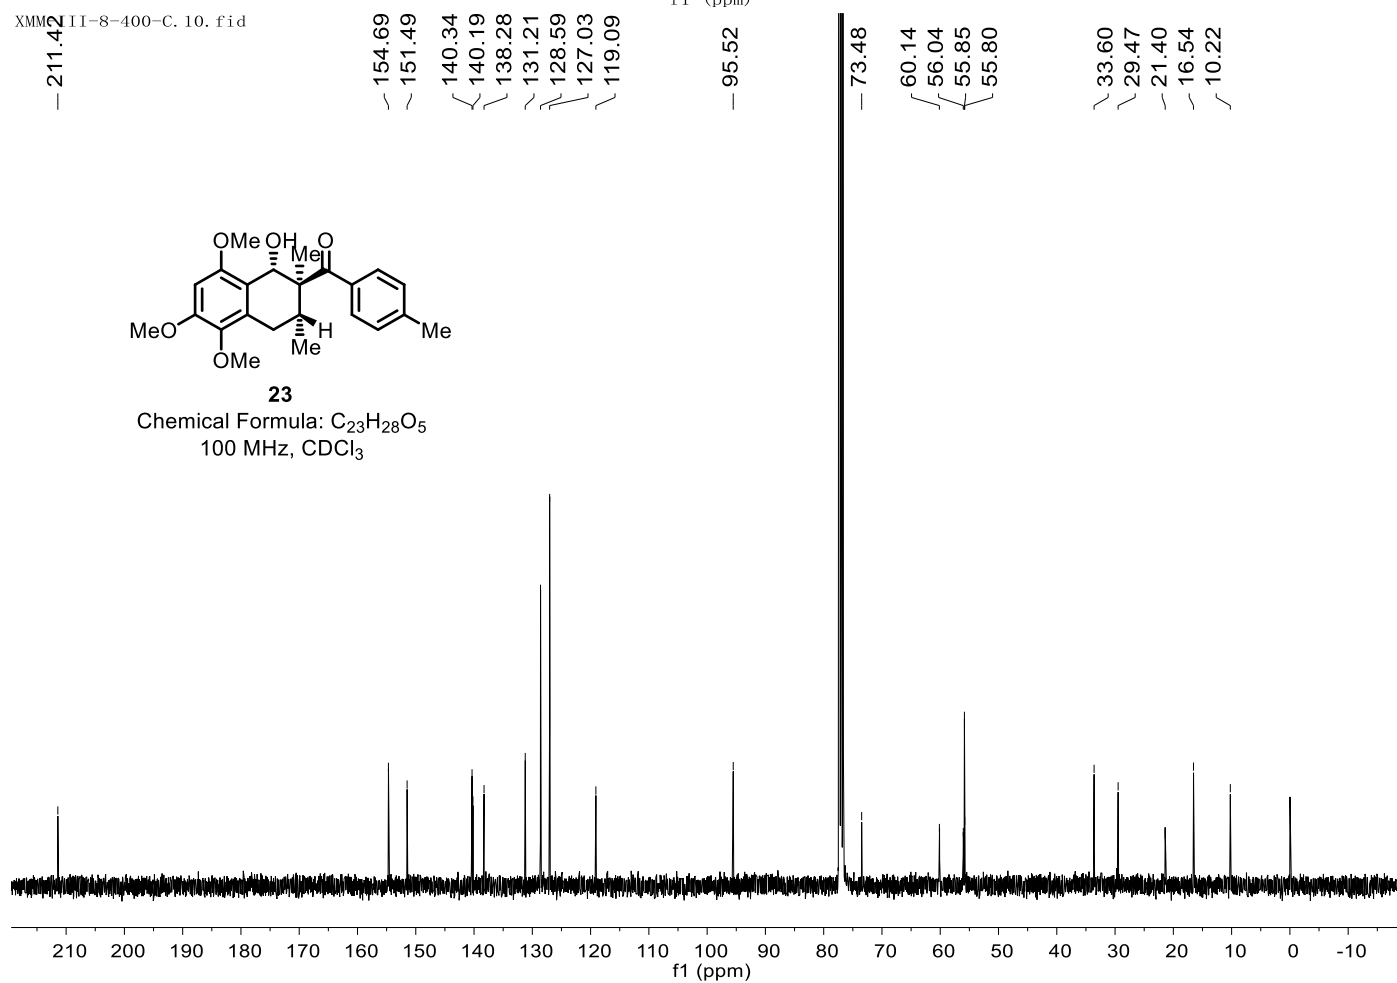



HM-V-56-1/1  
HM-V-56-1

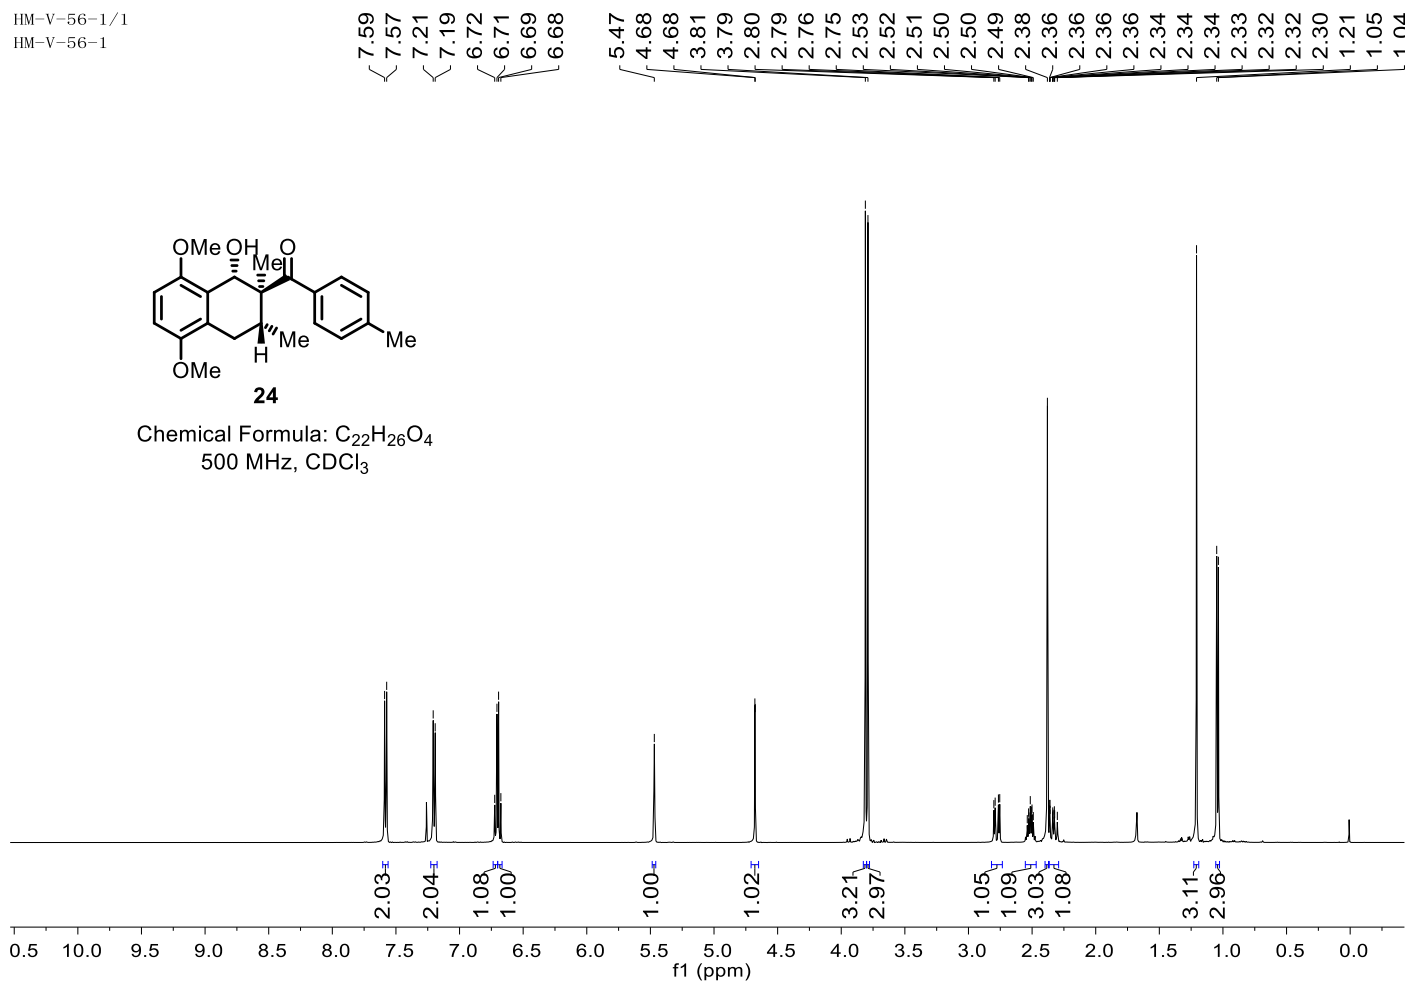

HM-V-56-1 C/3  
HM-V-56-1 C

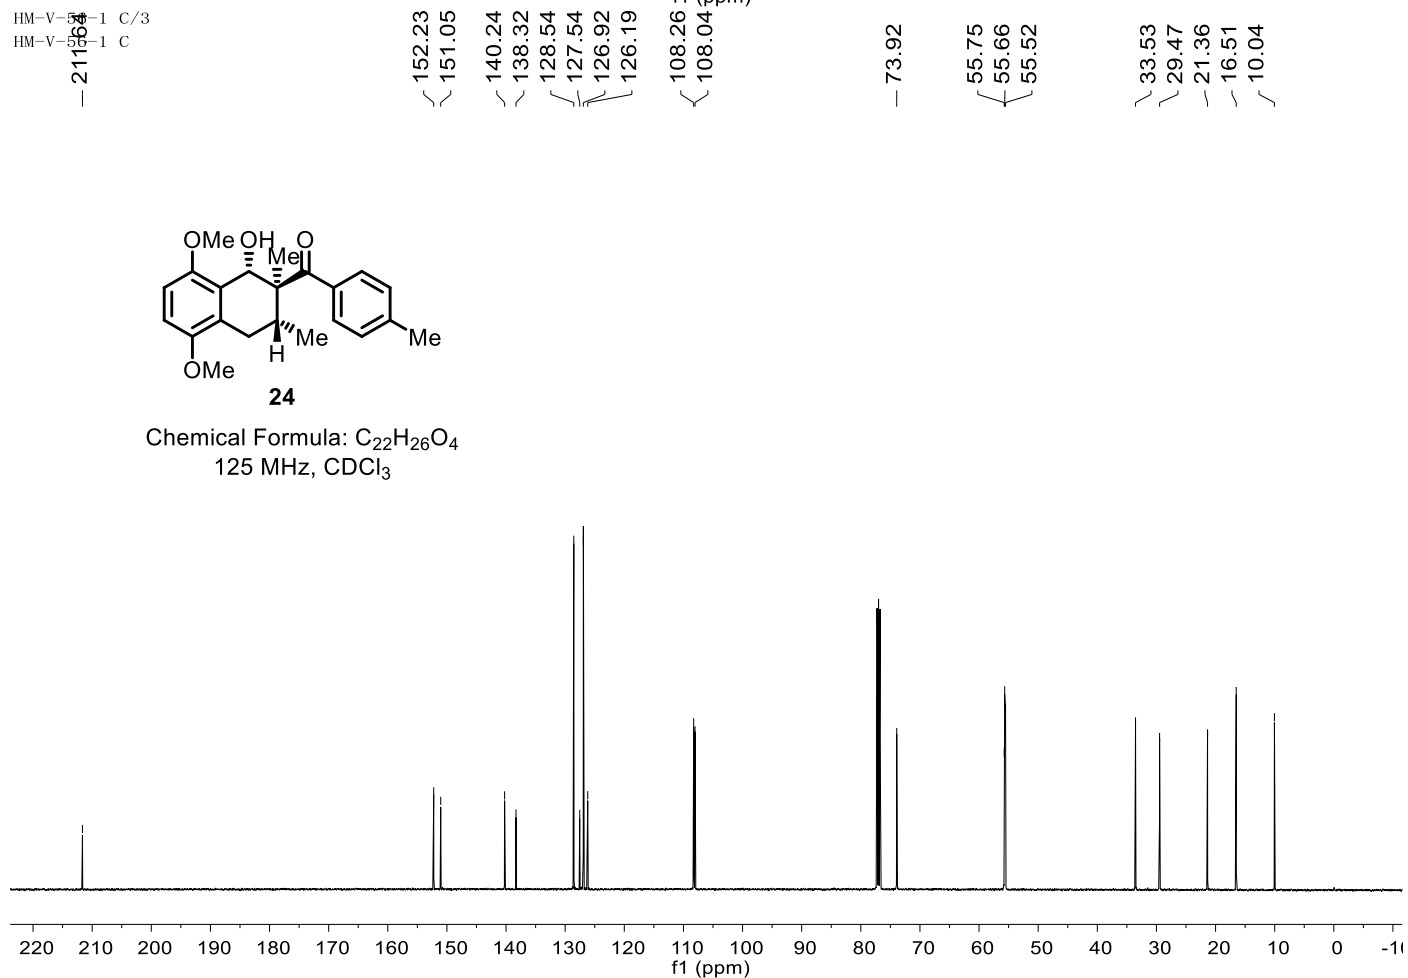

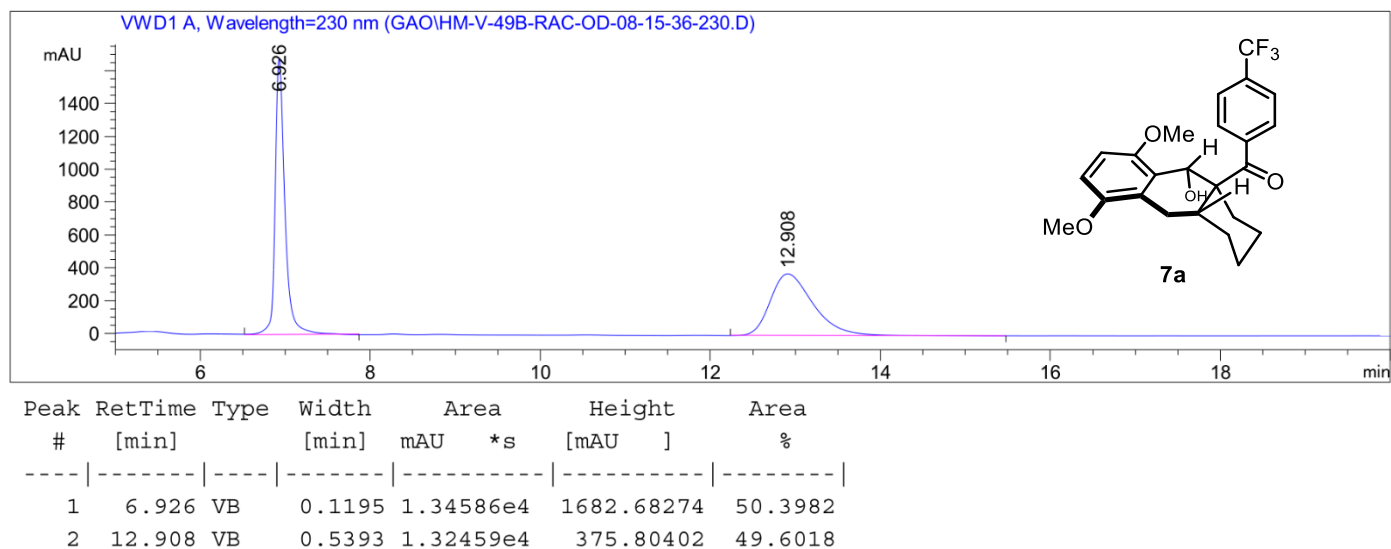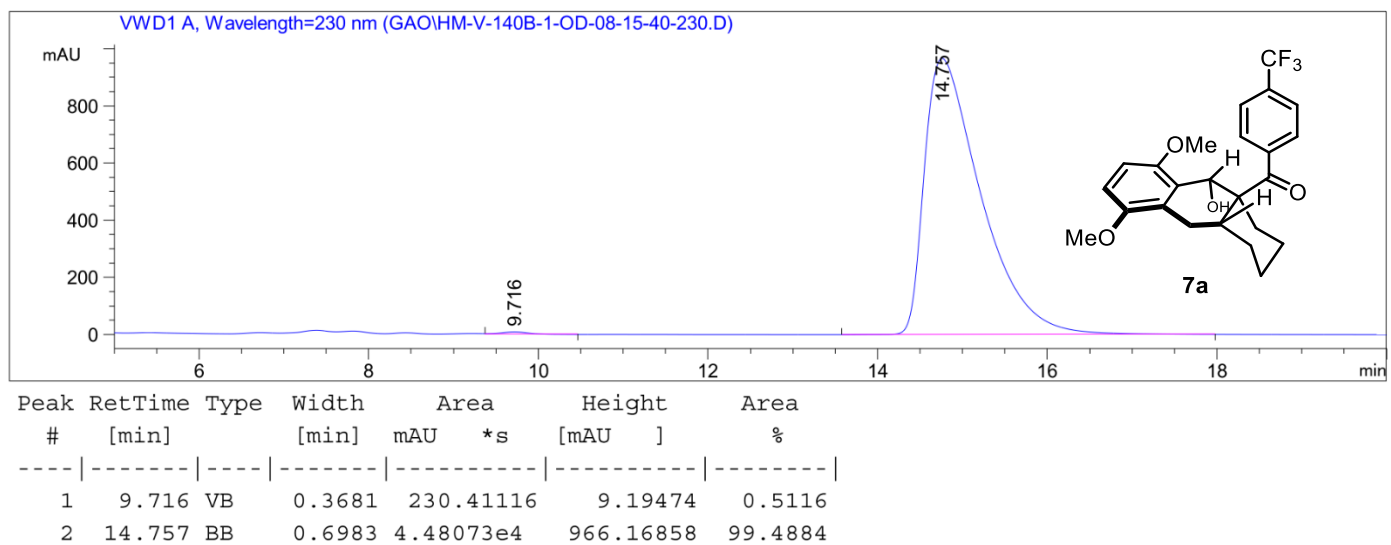

Enantiomeric excess: 99%, determined by HPLC (Daicel Chiralpak IG, hexane/isopropanol = 70/30, flow rate 0.8 mL/min, T = 25 °C, 230 nm):  $t_R$  = 10.883min (major),  $t_R$  = 17.052 min (minor).

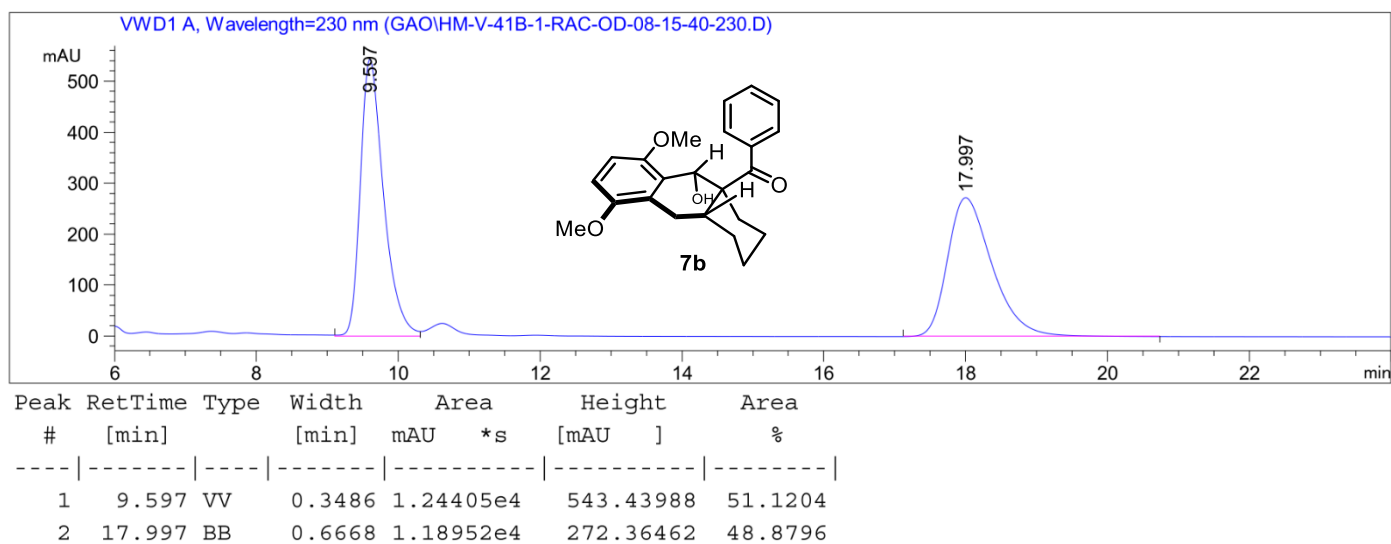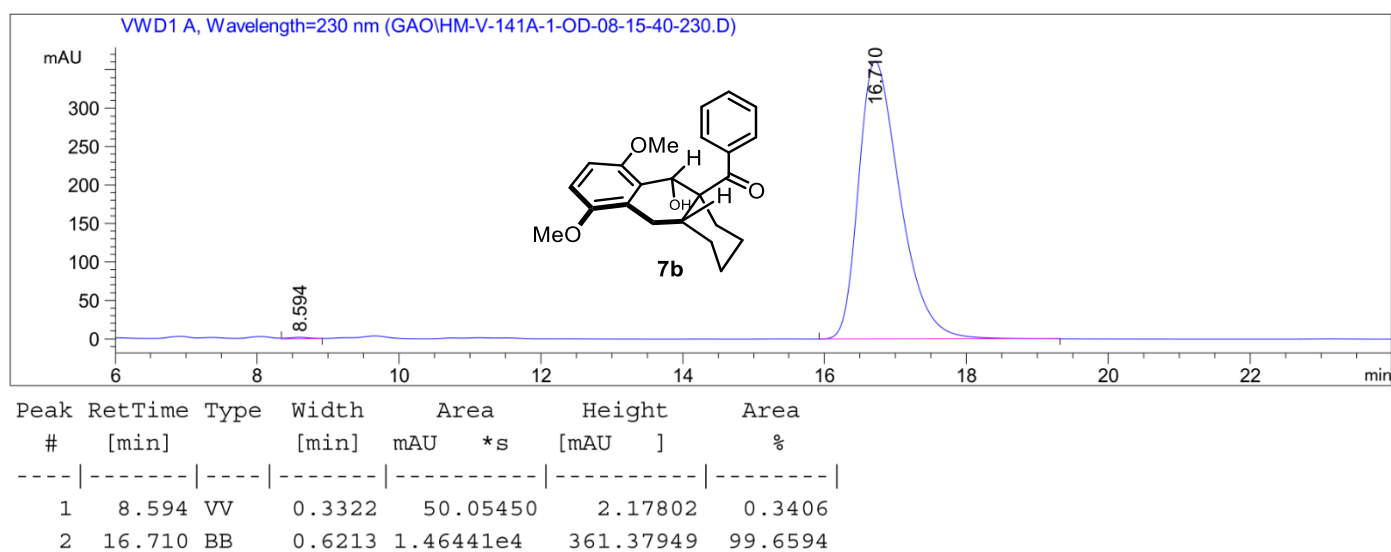

Enantiomeric excess: 99.3%, determined by HPLC (Daicel Chiralpak OD-H, hexane/isopropanol = 85/15, flow rate 0.8 mL/min, T = 25 °C, 230 nm):  $t_R$  = 8.594min (minor),  $t_R$  = 16.710 min (major).

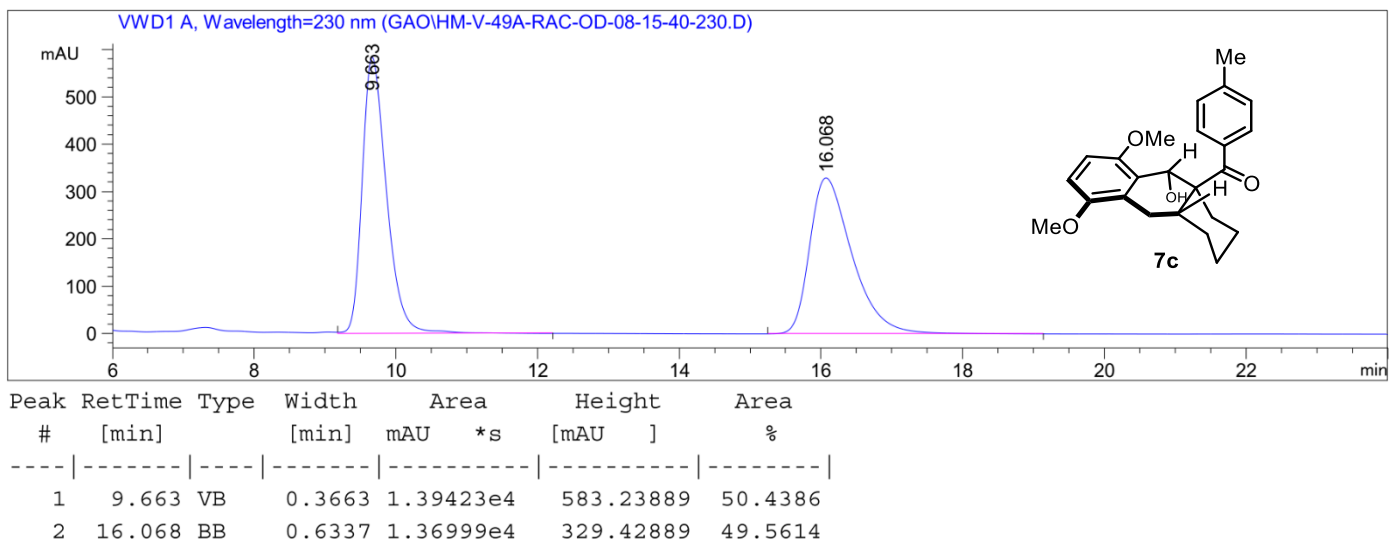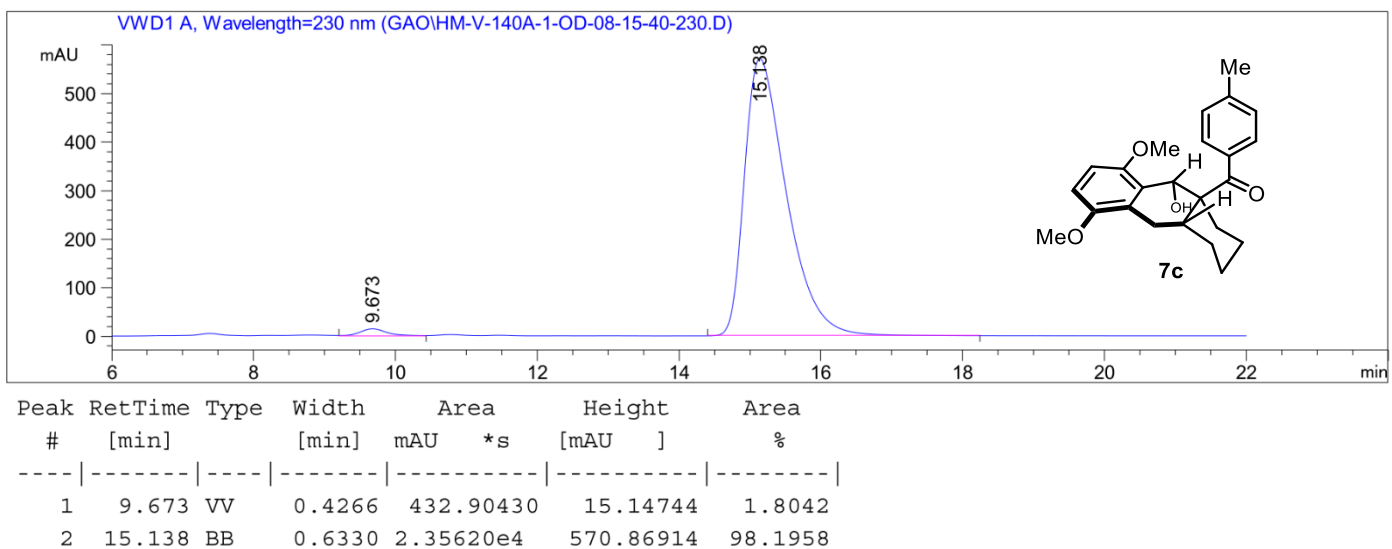

Enantiomeric excess: 96%, determined by HPLC (Daicel Chiralpak OD-H, hexane/isopropanol = 70/30, flow rate 0.8 mL/min, T = 25 °C, 230 nm):  $t_R$  = 9.673min (minor),  $t_R$  = 15.138 min (major).

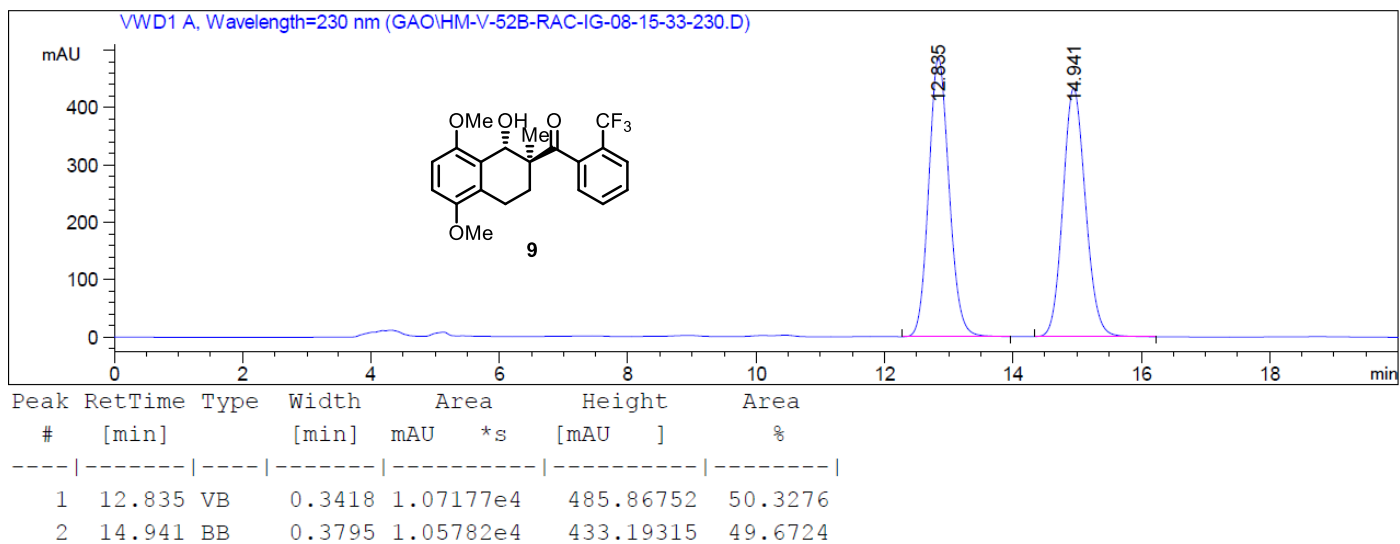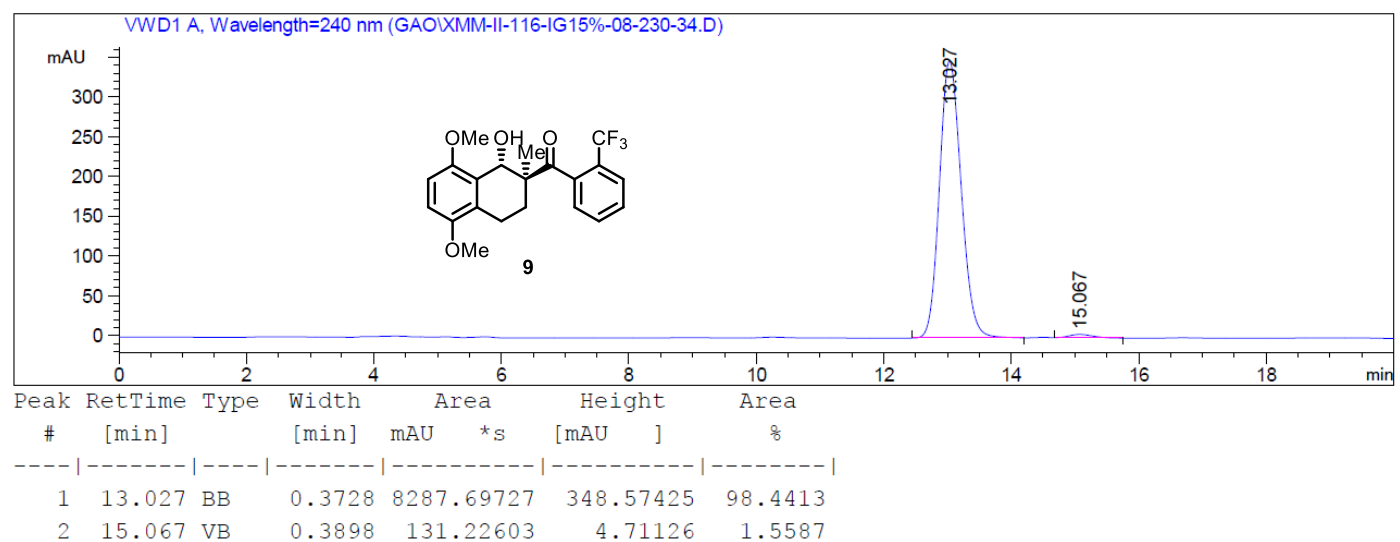

Enantiomeric excess: 97%, determined by HPLC (Daicel Chiralpak IG, hexane/isopropanol = 85/15, flow rate 0.8 mL/min, T = 25 °C, 230 nm):  $t_R$  = 13.027 min (major),  $t_R$  = 15.067 min (minor).

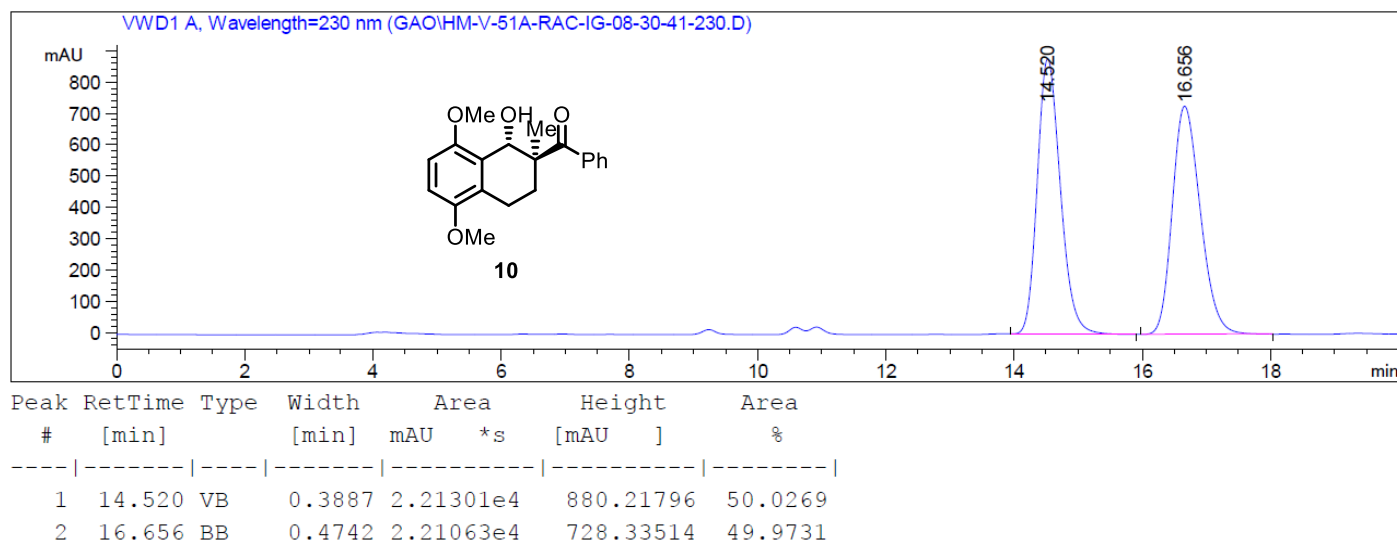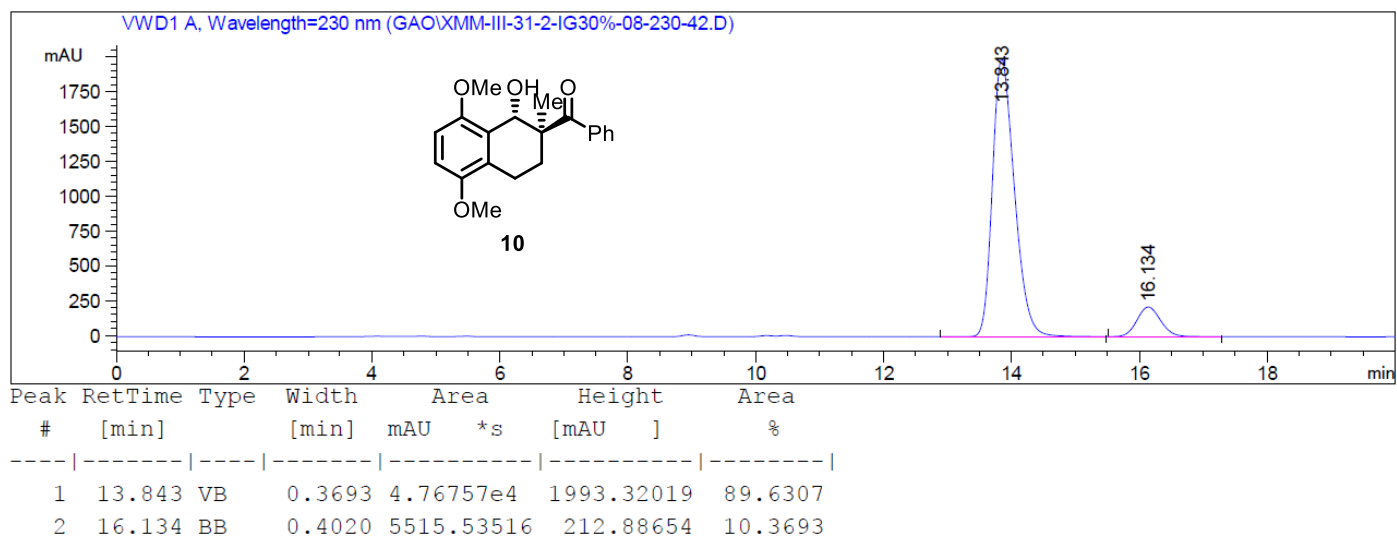

Enantiomeric excess: 79%, determined by HPLC (Daicel Chiralpak IG, hexane/isopropanol = 70/30, flow rate 0.8 mL/min, T = 25 °C, 230 nm):  $t_R$  = 13.843 min (major),  $t_R$  = 16.134 min (minor).

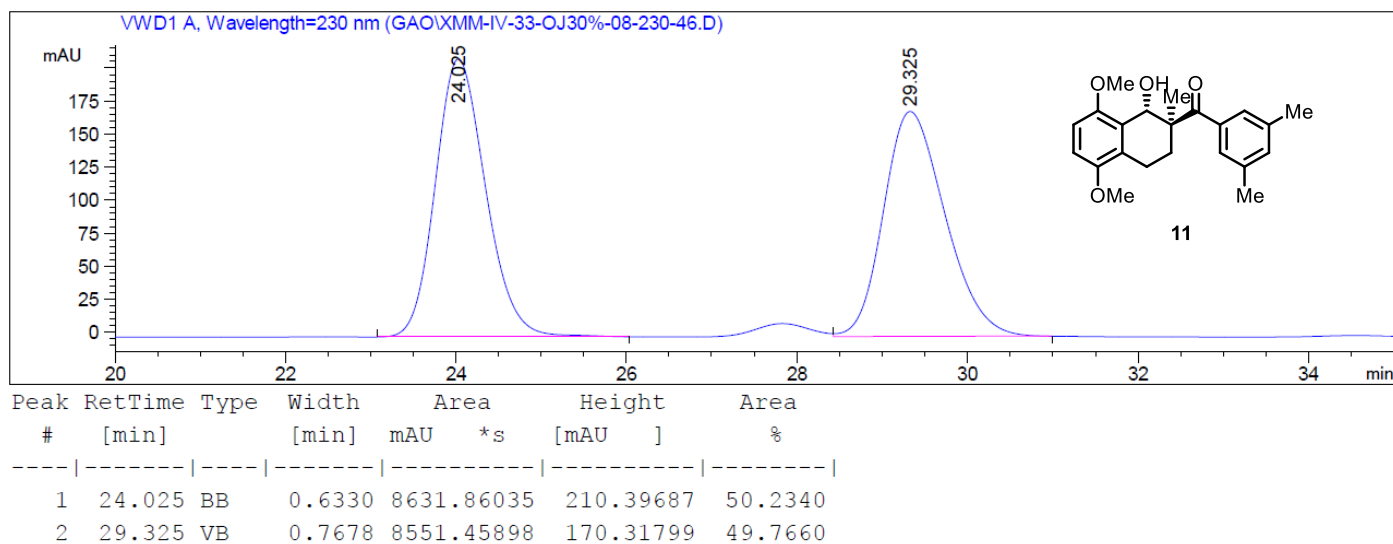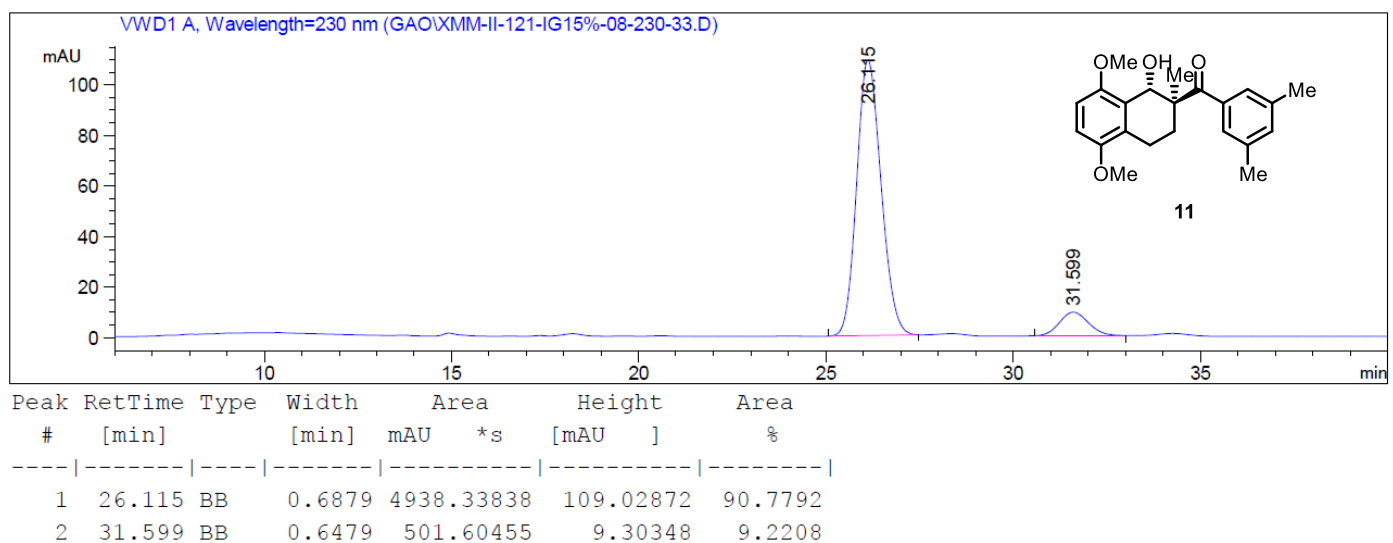

Enantiomeric excess: 82%, determined by HPLC (Daicel Chiralpak IG, hexane/isopropanol = 85/15, flow rate 0.8 mL/min, T = 25 °C, 230 nm):  $t_R$  = 26.115 min (major),  $t_R$  = 31.599 min (minor).

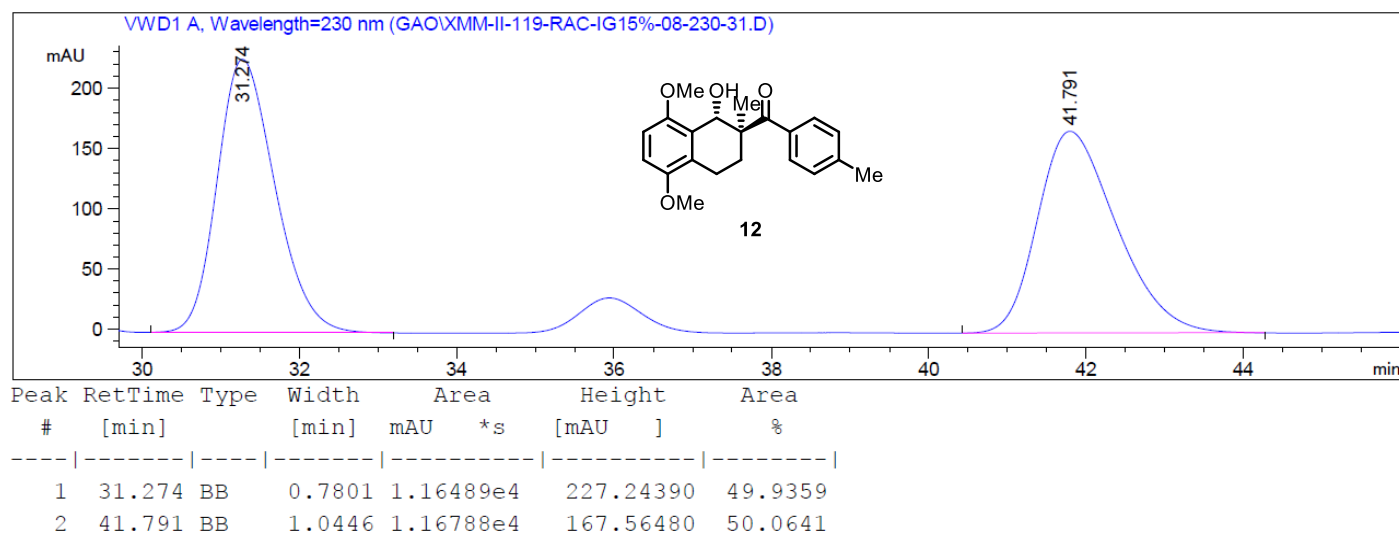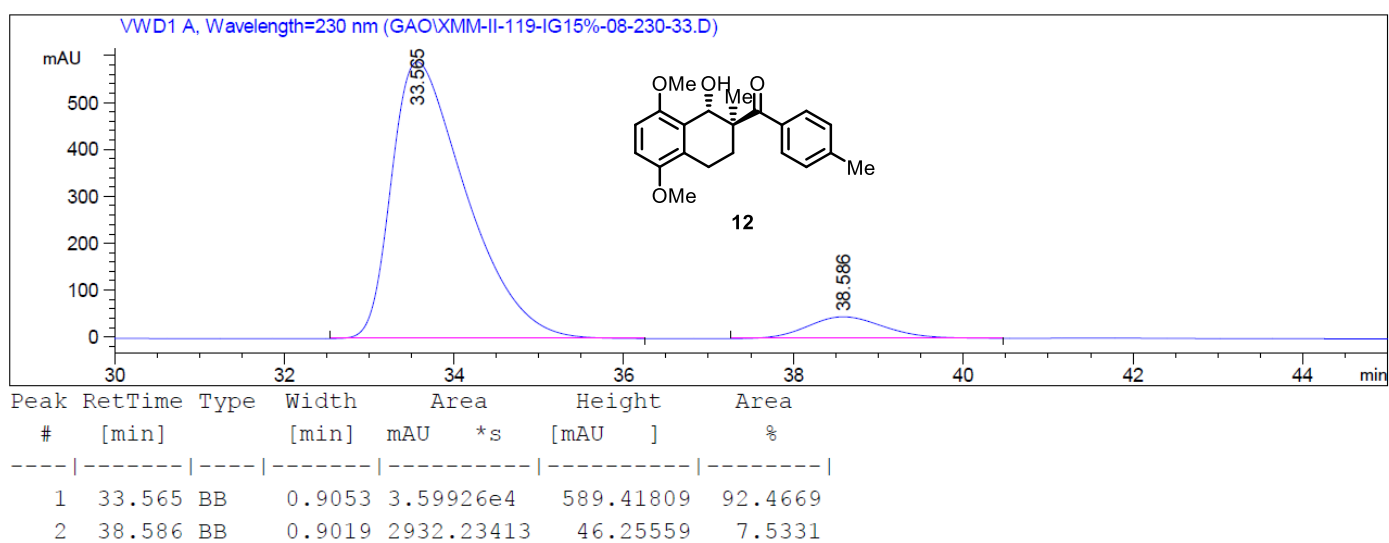

Enantiomeric excess: 85%, determined by HPLC (Daicel Chiralpak IG, hexane/isopropanol = 85/15, flow rate 0.8 mL/min, T = 25 °C, 230 nm):  $t_R$  = 33.565 min (major),  $t_R$  = 38.586 min (minor).



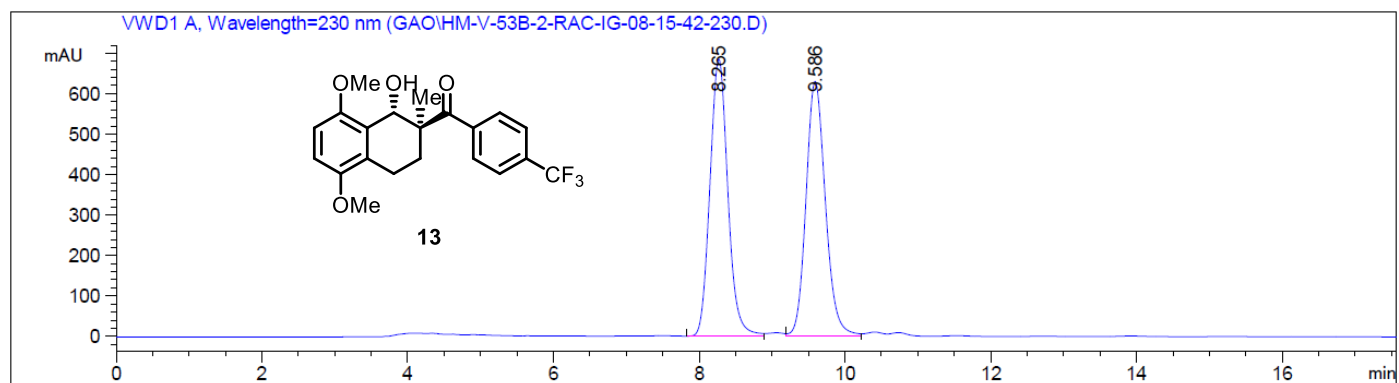

| Peak # | RetTime [min] | Type | Width [min] | Area mAU  | Area *s | Height [mAU] | Area %  |
|--------|---------------|------|-------------|-----------|---------|--------------|---------|
| 1      | 8.265         | VV   | 0.2655      | 1.17005e4 |         | 685.04230    | 50.0496 |
| 2      | 9.586         | VV   | 0.2861      | 1.16773e4 |         | 630.03430    | 49.9504 |

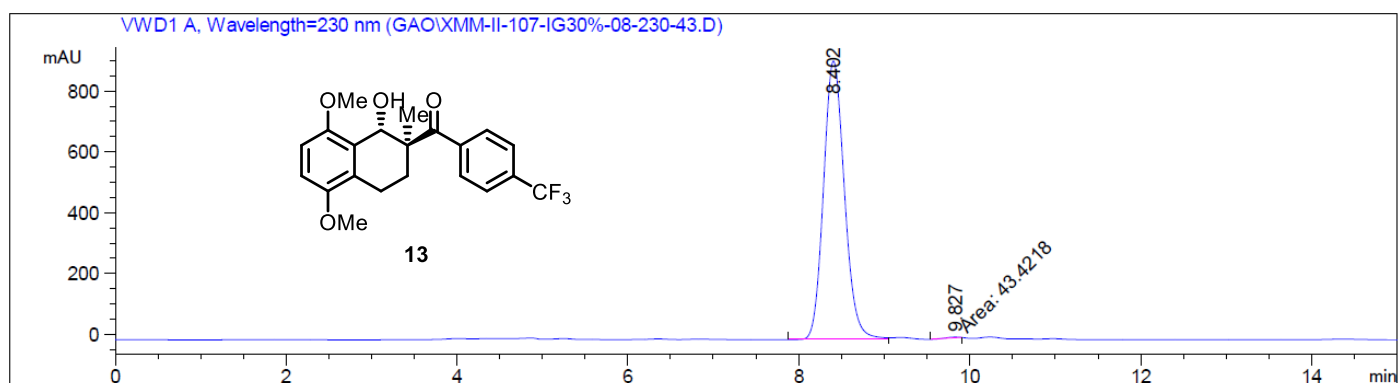

| Peak # | RetTime [min] | Type | Width [min] | Area mAU  | Area *s | Height [mAU] | Area %  |
|--------|---------------|------|-------------|-----------|---------|--------------|---------|
| 1      | 8.402         | BV   | 0.2642      | 1.56176e4 |         | 917.16034    | 99.7227 |
| 2      | 9.827         | MM   | 0.2092      | 43.42182  |         | 3.45883      | 0.2773  |

Enantiomeric excess: 99.5%, determined by HPLC (Daicel Chiralpak IG, hexane/isopropanol = 70/30, flow rate 0.8 mL/min, T = 25 °C, 230 nm):  $t_R$  = 8.402 min (major),  $t_R$  = 9.827 min (minor).

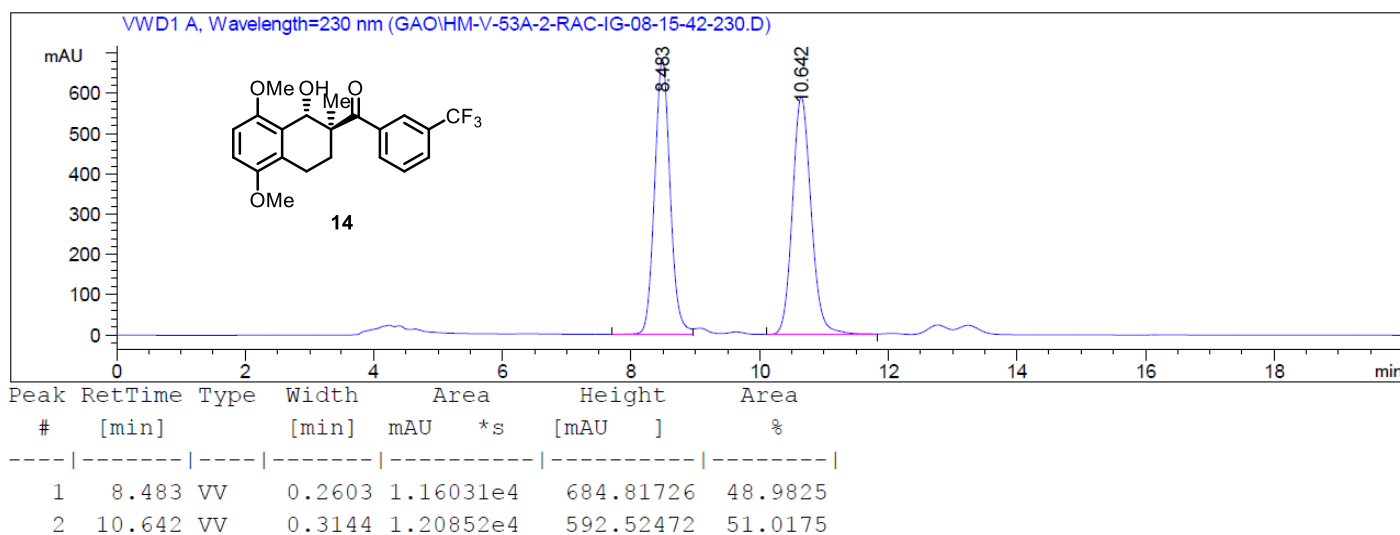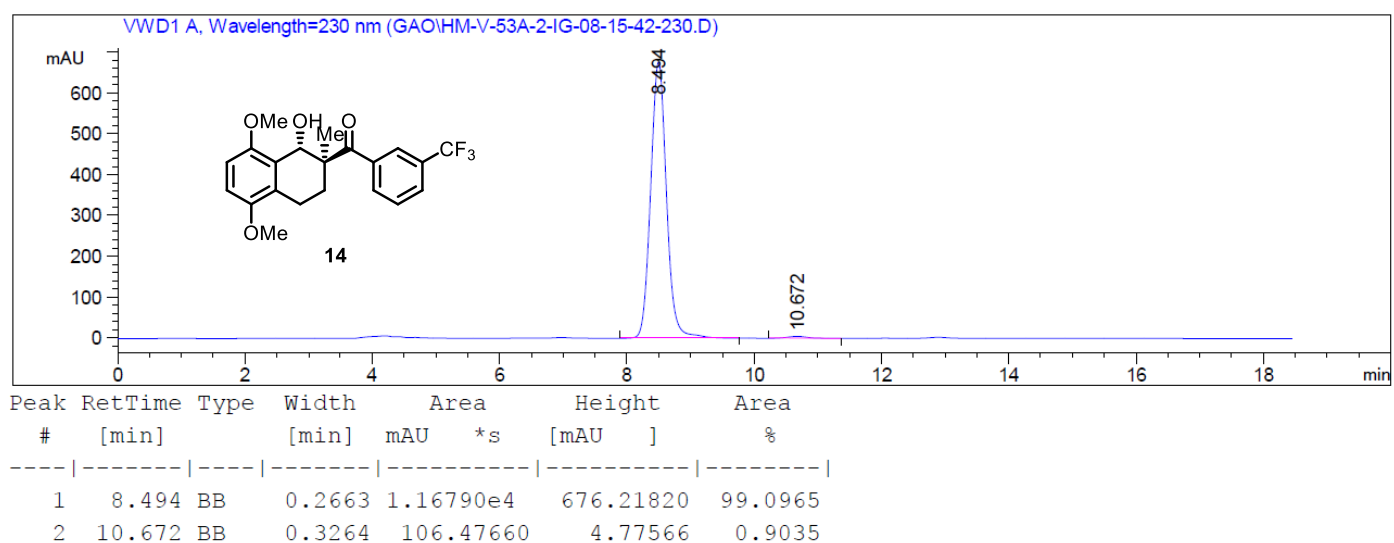

Enantiomeric excess: 98%, determined by HPLC (Daicel Chiralpak IG, hexane/isopropanol = 85/15, flow rate 0.8 mL/min, T = 25 °C, 230 nm):  $t_R$  = 8.494 min (major),  $t_R$  = 10.672 min (minor).

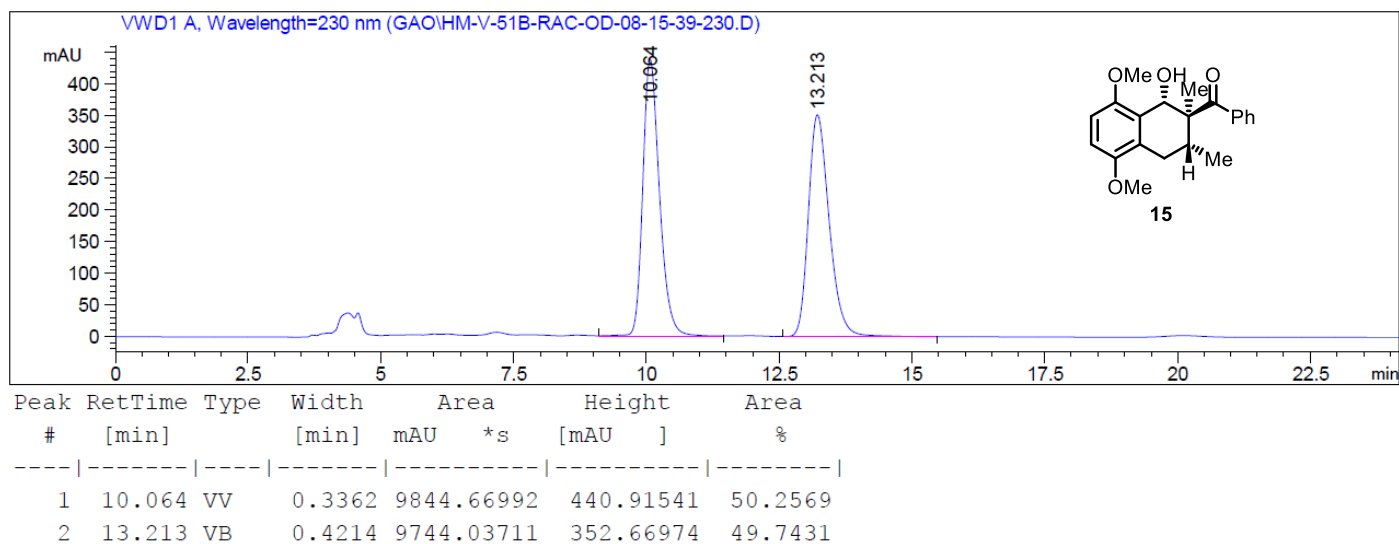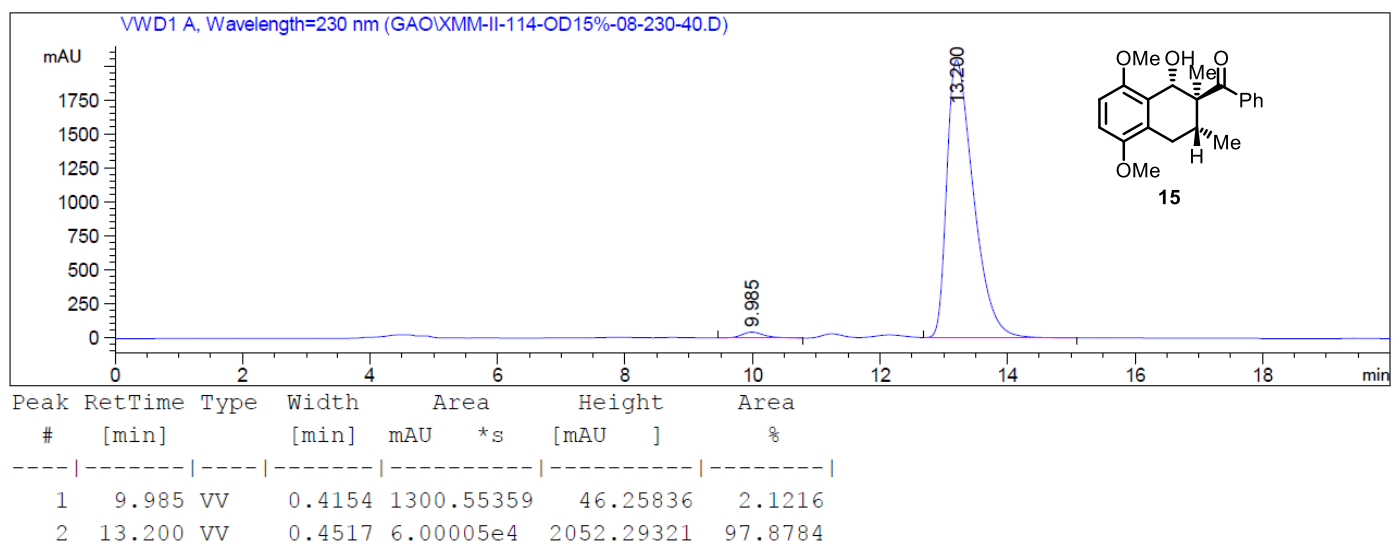

Enantiomeric excess: 96%, determined by HPLC (Daicel Chiralpak OD-H, hexane/isopropanol = 85/15, flow rate 0.8 mL/min, T = 25 °C, 230 nm):  $t_R$  = 9.985 min (minor),  $t_R$  = 13.200 min (major).

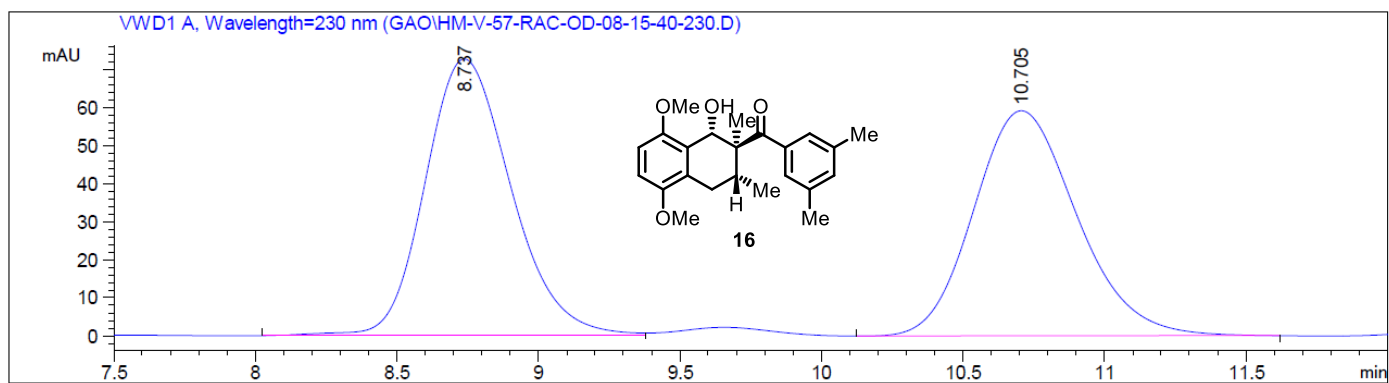

| Peak # | RetTime [min] | Type | Width [min] | Area mAU   | Area *s | Height [mAU] | Area %  |
|--------|---------------|------|-------------|------------|---------|--------------|---------|
| 1      | 8.737         | BV   | 0.3313      | 1544.34644 |         | 72.78861     | 50.6657 |
| 2      | 10.705        | VB   | 0.3952      | 1503.76575 |         | 59.22474     | 49.3343 |

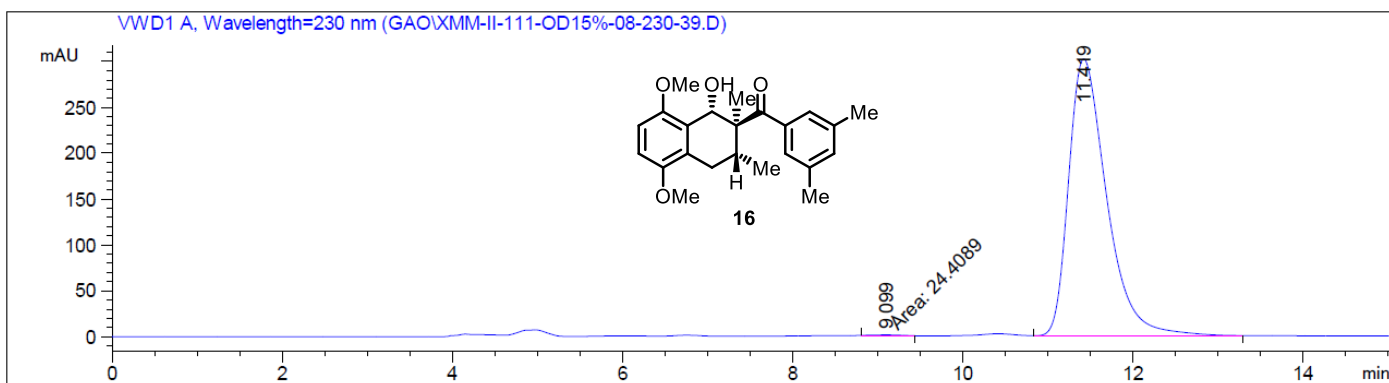

| Peak # | RetTime [min] | Type | Width [min] | Area mAU   | Area *s | Height [mAU] | Area %  |
|--------|---------------|------|-------------|------------|---------|--------------|---------|
| 1      | 9.099         | MM   | 0.4481      | 24.40888   |         | 9.07885e-1   | 0.2597  |
| 2      | 11.419        | VB   | 0.4750      | 9374.61816 |         | 301.95764    | 99.7403 |

Enantiomeric excess: 99%, determined by HPLC (Daicel Chiralpak OD-H, hexane/isopropanol = 85/15, flow rate 0.8 mL/min, T = 25 °C, 230 nm):  $t_R$  = 9.099 min (major),  $t_R$  = 11.419 min (minor).

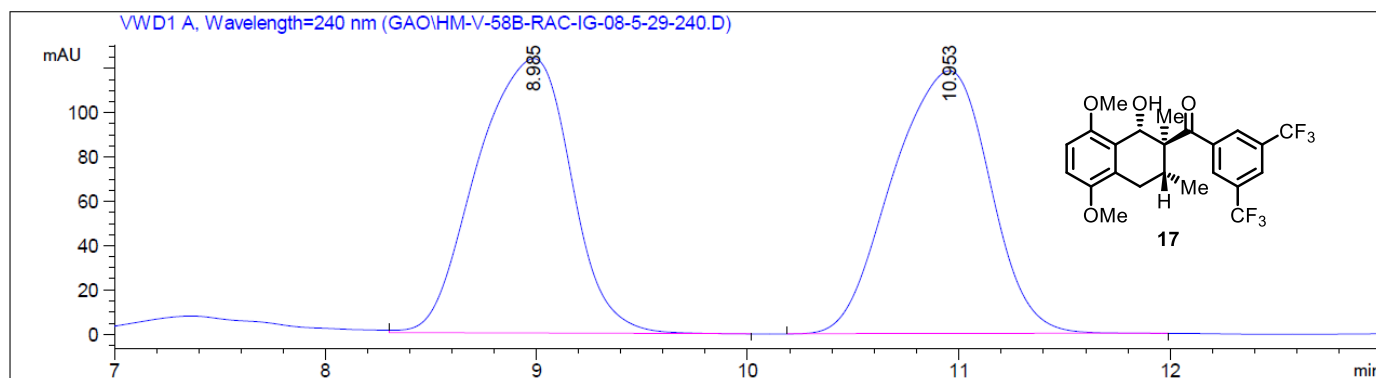

| Peak # | RetTime [min] | Type | Width [min] | Area mAU *s | Height [mAU] | Area %  |
|--------|---------------|------|-------------|-------------|--------------|---------|
| 1      | 8.985         | VB   | 0.5154      | 3850.94165  | 123.94193    | 50.2663 |
| 2      | 10.953        | BB   | 0.5303      | 3810.13647  | 118.68534    | 49.7337 |

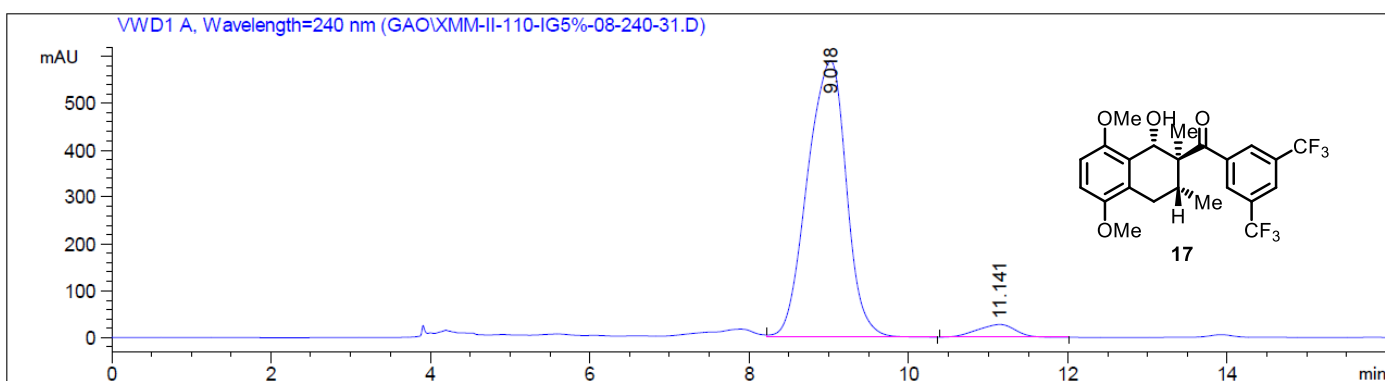

| Peak # | RetTime [min] | Type | Width [min] | Area mAU *s | Height [mAU] | Area %  |
|--------|---------------|------|-------------|-------------|--------------|---------|
| 1      | 9.018         | VB   | 0.5491      | 2.00868e4   | 590.39948    | 95.5540 |
| 2      | 11.141        | BB   | 0.4889      | 934.61066   | 27.55549     | 4.4460  |

Enantiomeric excess: 91%, determined by HPLC (Daicel Chiralpak IG, hexane/isopropanol = 95/5, flow rate 0.8 mL/min, T = 25 °C, 230 nm):  $t_R$  = 9.018 min (major),  $t_R$  = 11.141 min (minor).

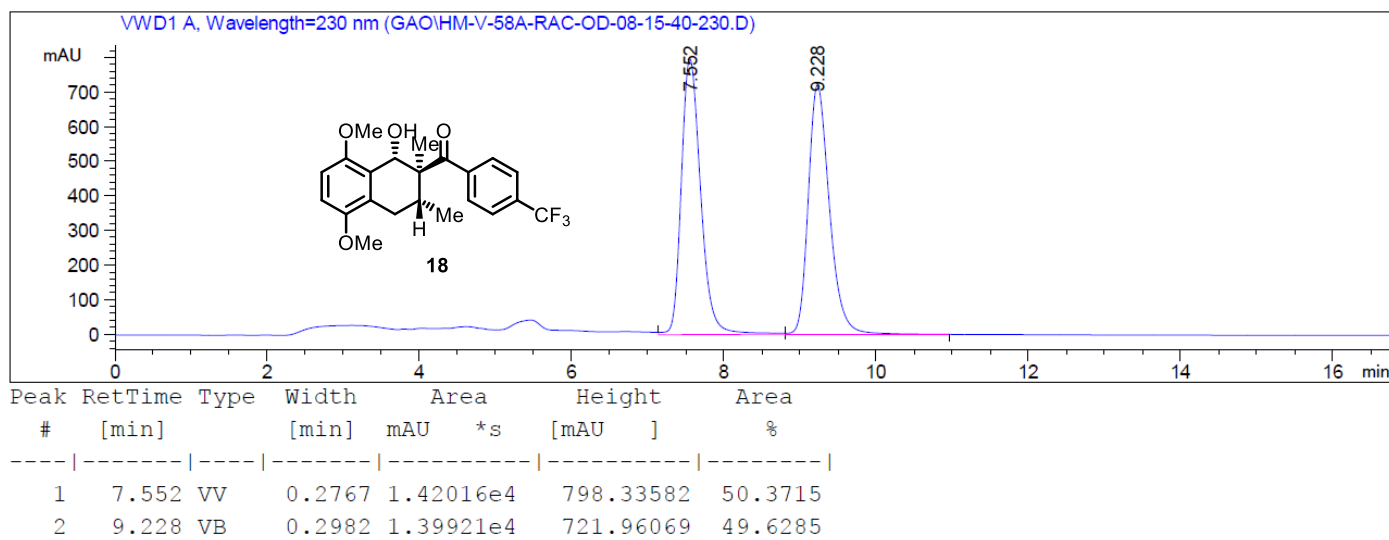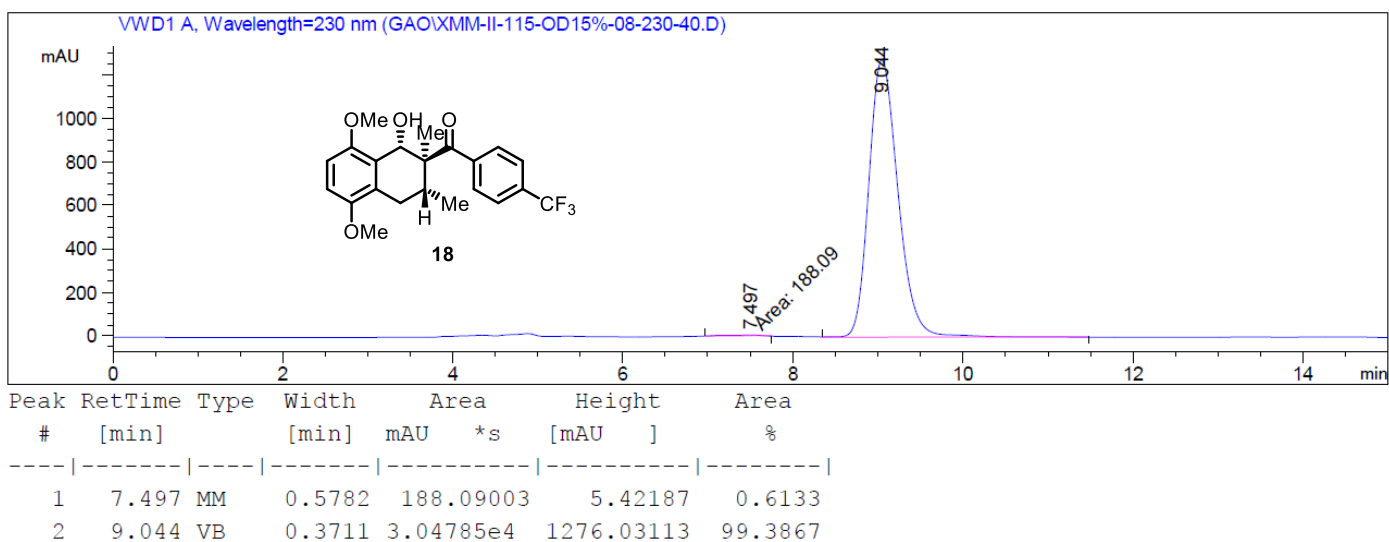

Enantiomeric excess: 99%, determined by HPLC (Daicel Chiralpak OD-H, hexane/isopropanol = 85/15, flow rate 0.8 mL/min, T = 25 °C, 230 nm):  $t_R$  = 7.497 min (minor),  $t_R$  = 9.044 min (major).

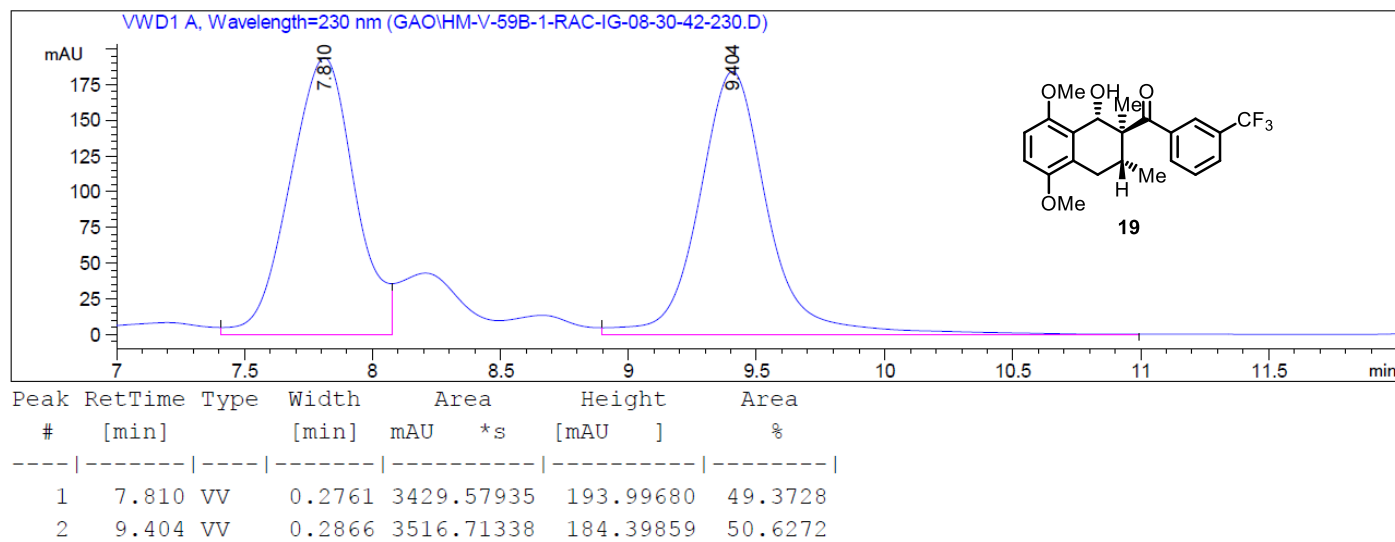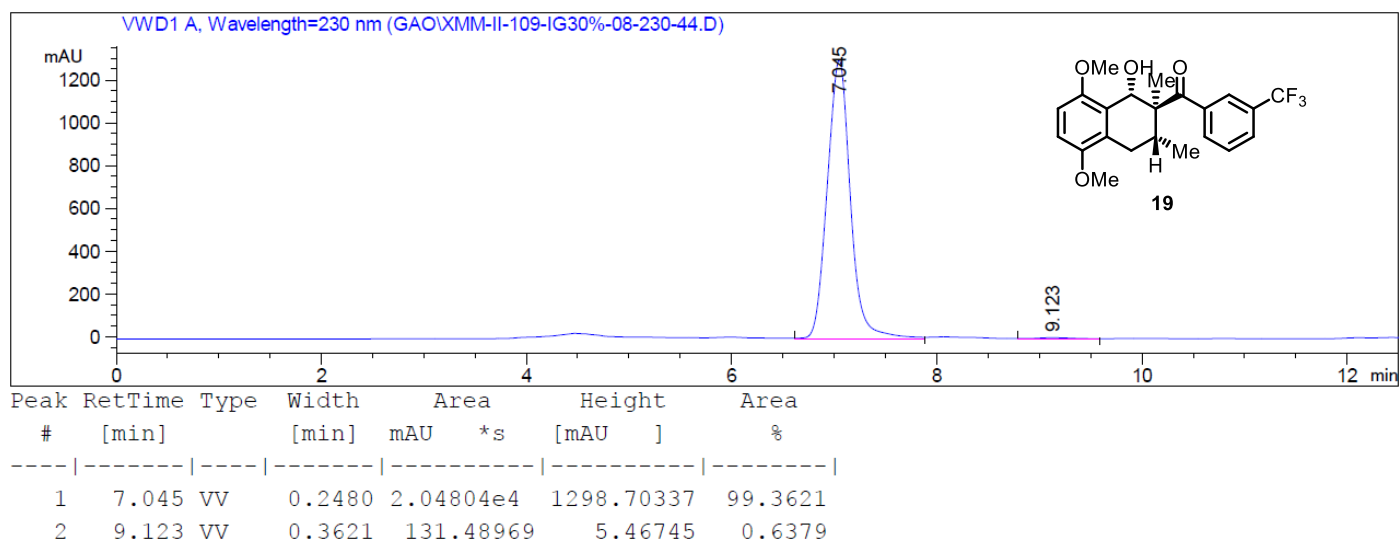

Enantiomeric excess: 99%, determined by HPLC (Daicel Chiralpak IG, hexane/isopropanol = 70/30, flow rate 0.8 mL/min, T = 25 °C, 230 nm):  $t_R$  = 7.045 min (major),  $t_R$  = 9.123 min (minor).

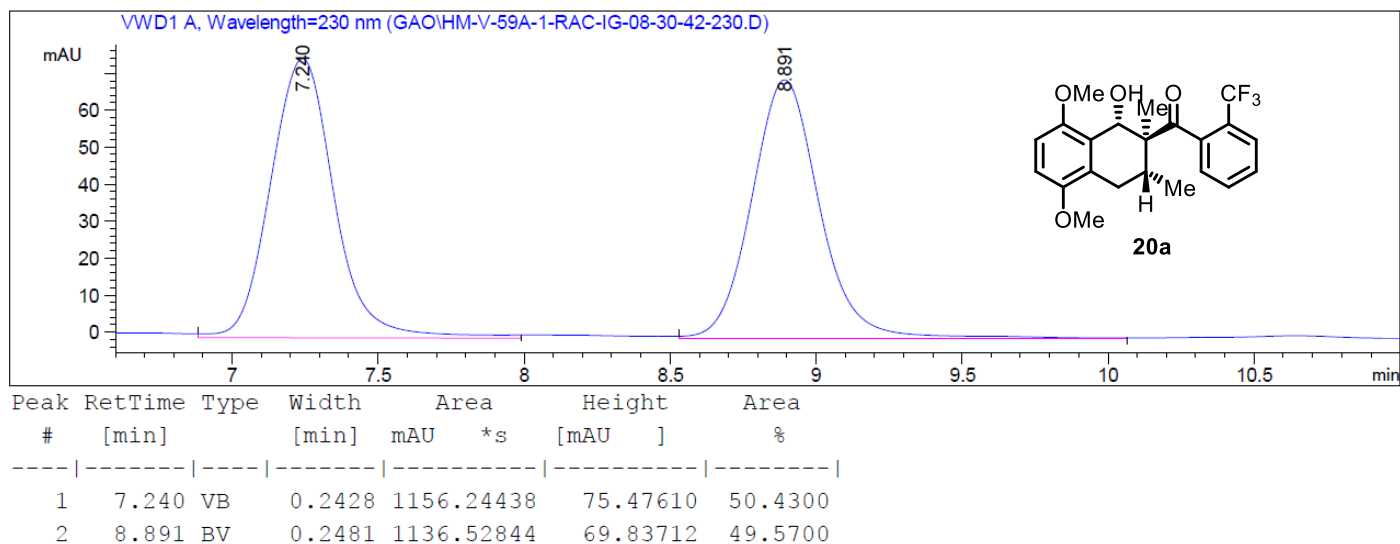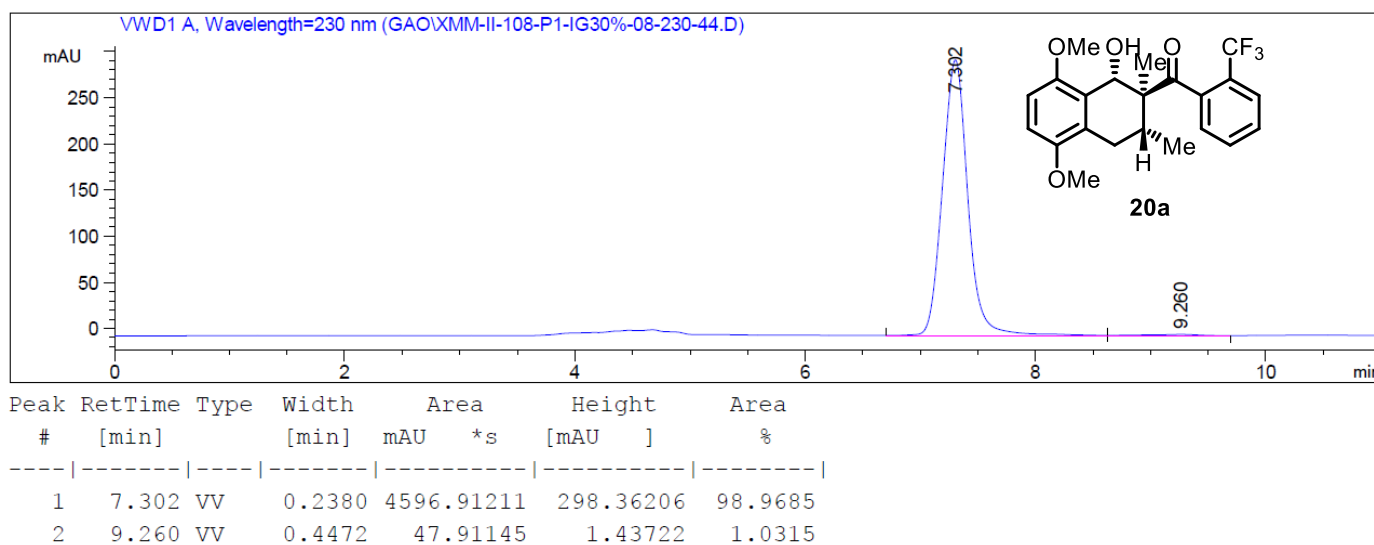

Enantiomeric excess: 98%, determined by HPLC (Daicel Chiralpak IG, hexane/isopropanol = 70/30, flow rate 0.8 mL/min, T = 25 °C, 230 nm):  $t_R$  = 7.302 min (major),  $t_R$  = 9.260 min (minor).



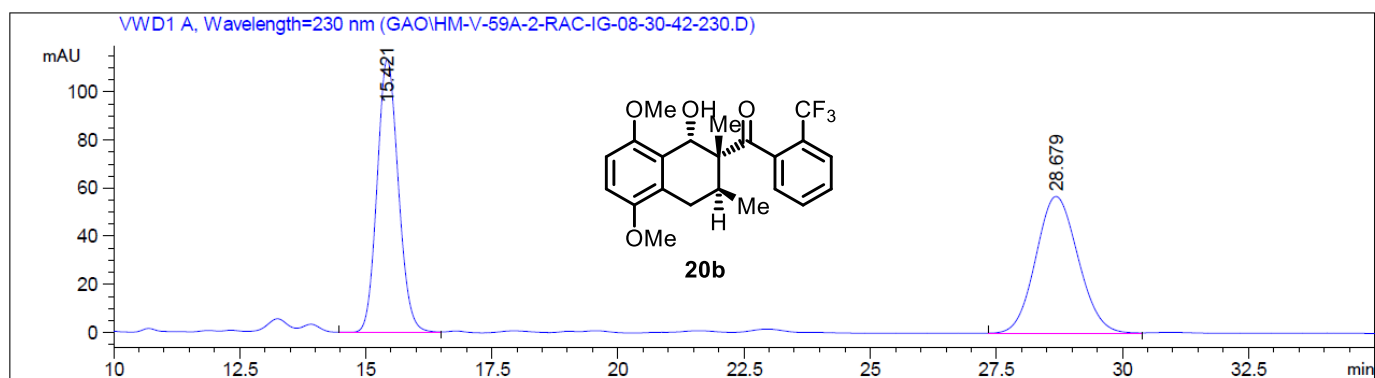

| Peak # | RetTime [min] | Type | Width [min] | Area mAU   | Area *s | Height [mAU] | Area %  |
|--------|---------------|------|-------------|------------|---------|--------------|---------|
| 1      | 15.421        | VV   | 0.4557      | 3364.09351 |         | 113.73121    | 50.3260 |
| 2      | 28.679        | BV   | 0.9085      | 3320.50854 |         | 56.85246     | 49.6740 |

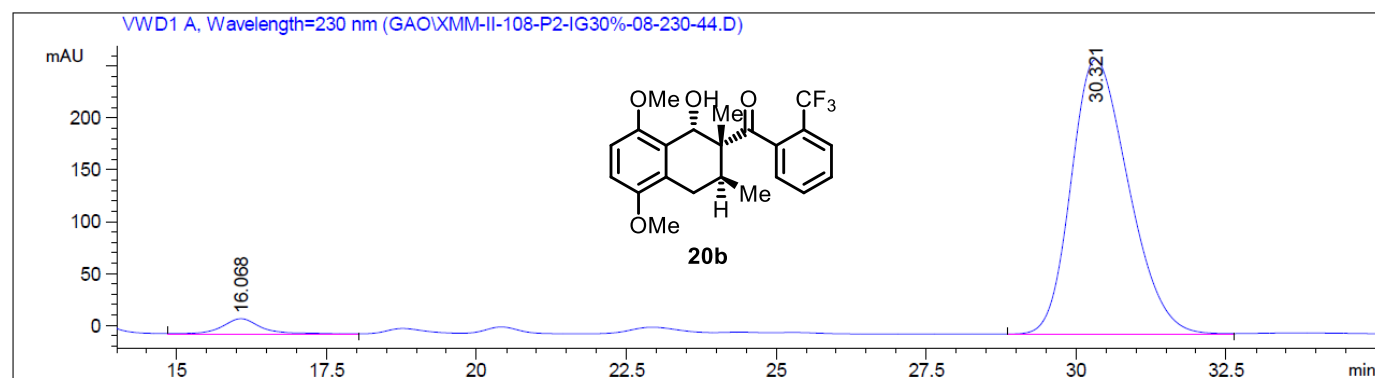

| Peak # | RetTime [min] | Type | Width [min] | Area mAU  | Area *s | Height [mAU] | Area %  |
|--------|---------------|------|-------------|-----------|---------|--------------|---------|
| 1      | 16.068        | VV   | 0.6835      | 699.70795 |         | 14.85572     | 3.8303  |
| 2      | 30.321        | BV   | 1.0309      | 1.75678e4 |         | 264.57599    | 96.1697 |

Enantiomeric excess: 92%, determined by HPLC (Daicel Chiralpak IG, hexane/isopropanol = 70/30, flow rate 0.8 mL/min, T = 25 °C, 230 nm):  $t_R$  = 16.068 min (minor),  $t_R$  = 30.321 min (major).

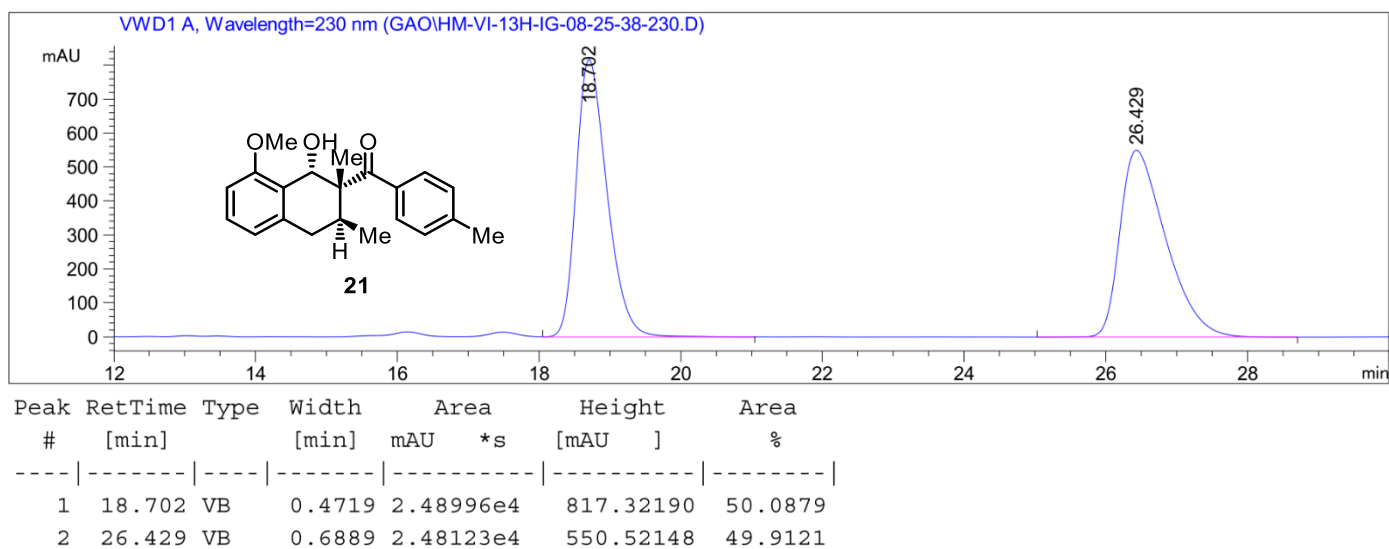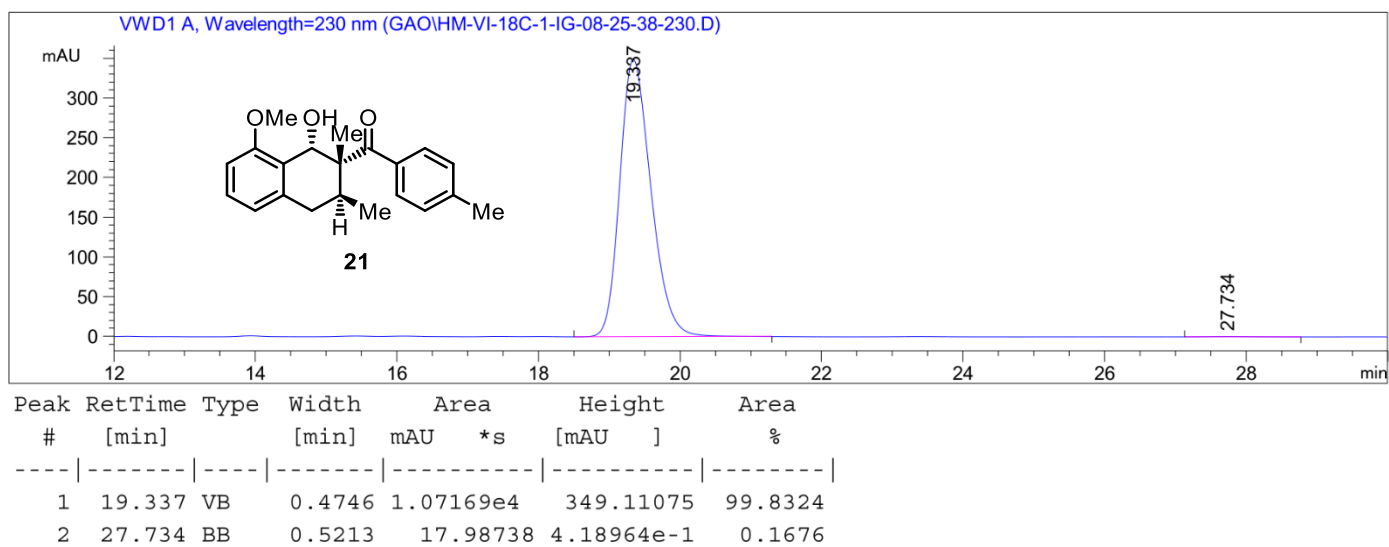

Enantiomeric excess: 99.7%, determined by HPLC (Daicel Chiralpak IG, hexane/isopropanol = 75/ 25, flow rate 0.8 mL/min, T = 25 °C, 230 nm):  $t_R$  = 19.337min (major),  $t_R$  = 27.734 min (minor).

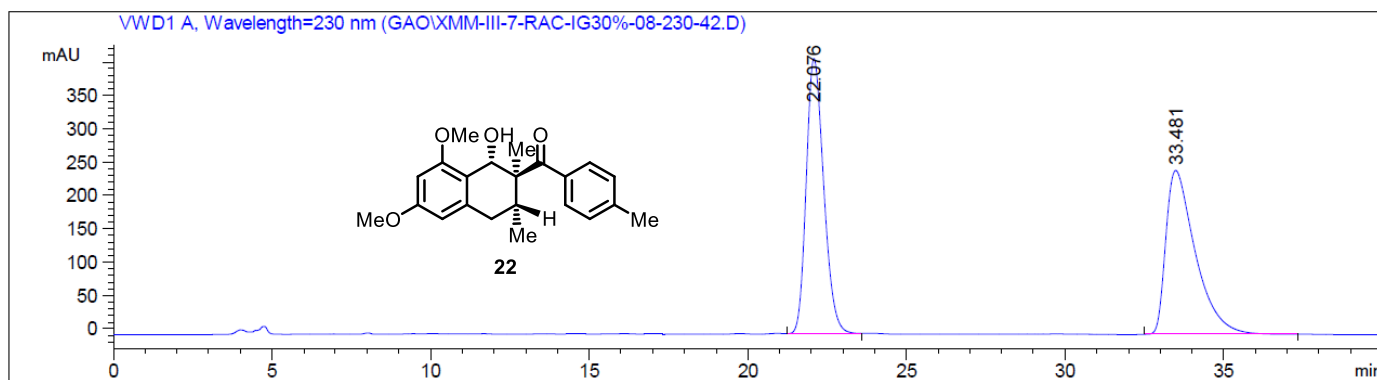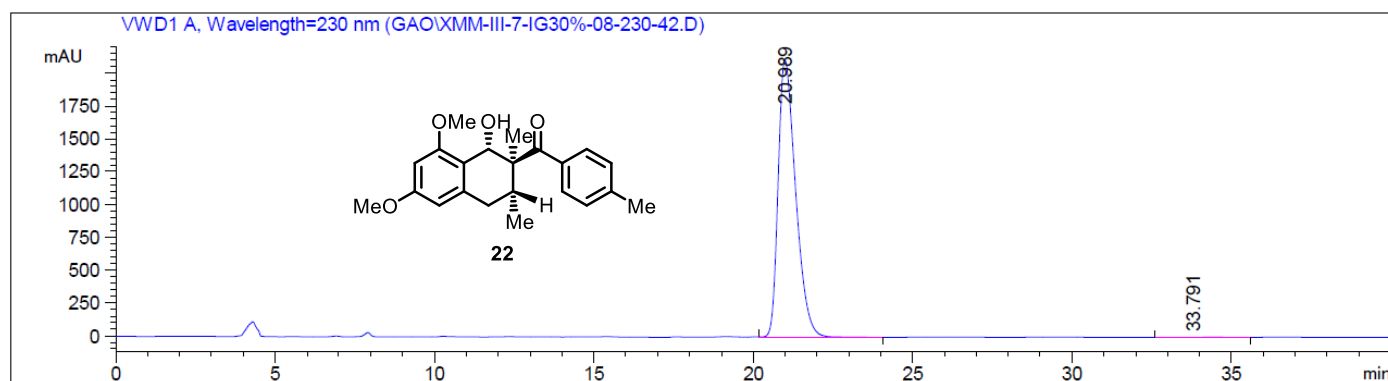

| Peak # | RetTime [min] | Type | Width [min] | Area mAU  | *s | Height [mAU] | Area %  |
|--------|---------------|------|-------------|-----------|----|--------------|---------|
| 1      | 20.989        | VB   | 0.5846      | 8.04561e4 |    | 2110.25391   | 99.9483 |
| 2      | 33.791        | BB   | 0.8272      | 41.60938  |    | 5.99532e-1   | 0.0517  |

Enantiomeric excess: 99.9%, determined by HPLC (Daicel Chiralpak IG, hexane/isopropanol = 70/30, flow rate 0.8 mL/min, T = 25 °C, 230 nm):  $t_R$  = 20.989 min (major),  $t_R$  = 33.791 min (minor).

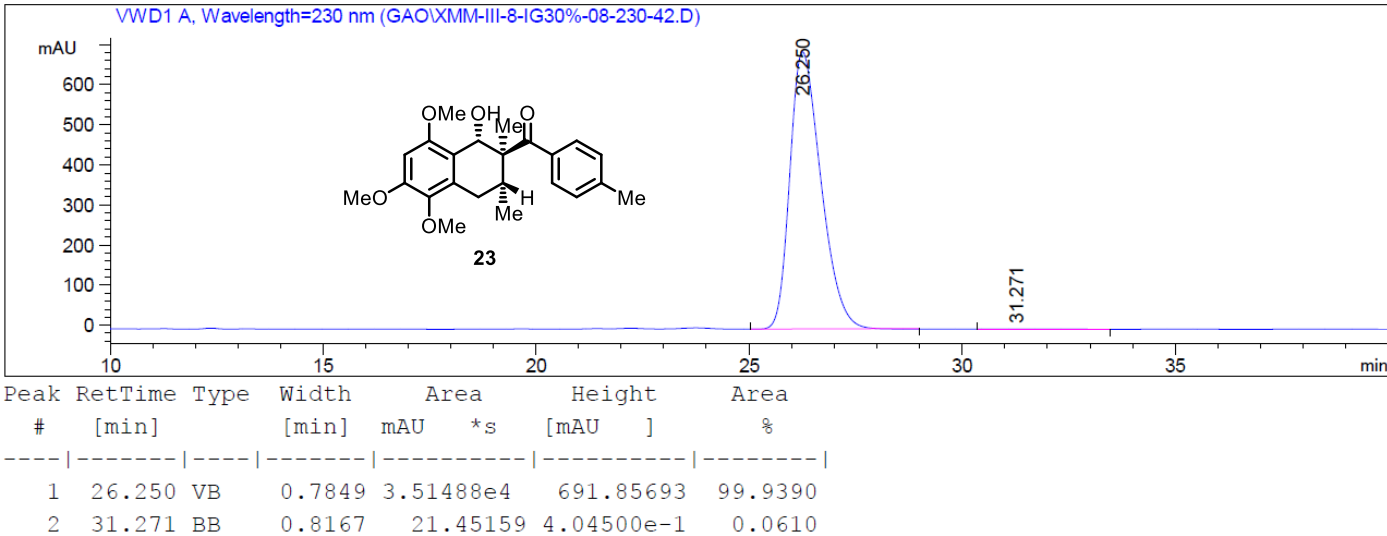

S60

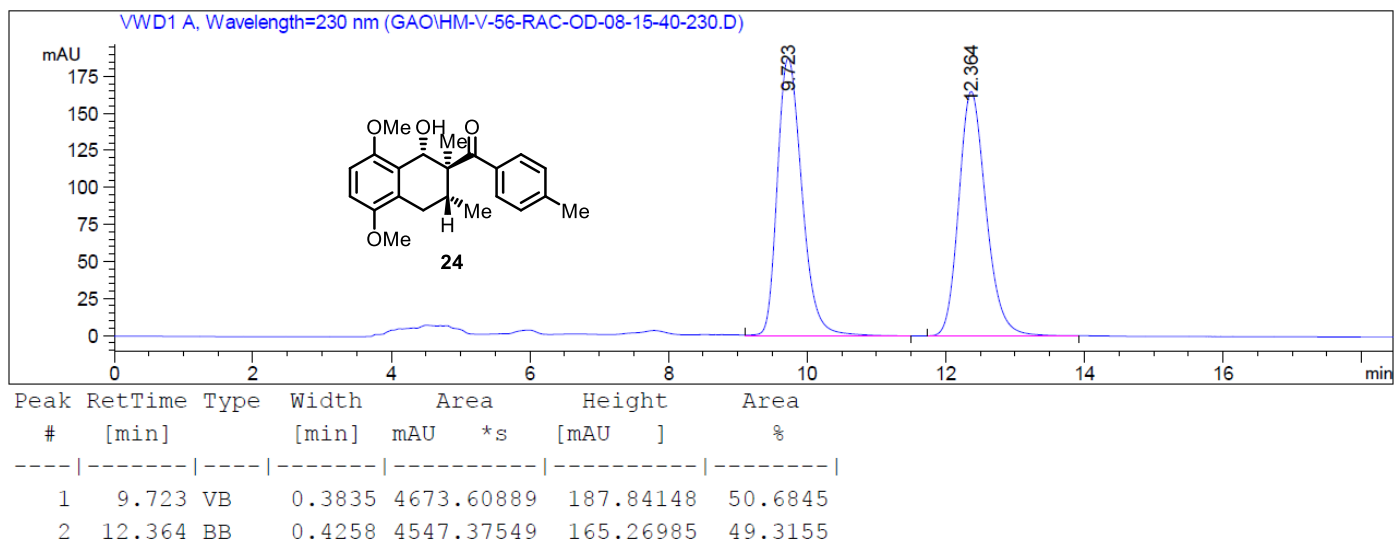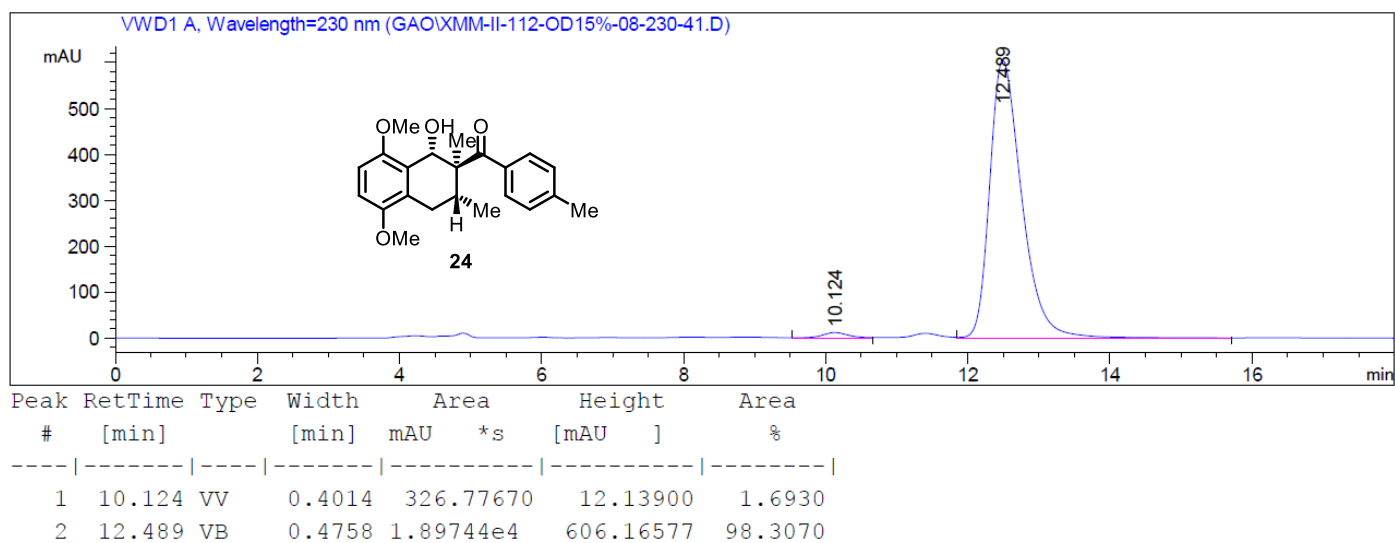

Enantiomeric excess: 97%, determined by HPLC (Daicel Chiralpak OD-H, hexane/isopropanol = 85/15, flow rate 0.8 mL/min, T = 25 °C, 230 nm):  $t_R$  = 10.124 min (minor),  $t_R$  = 12.489 min (major).
